# Supplementary material
Source: publisher site journal article supplement (https://www.spandidos-publications.com/7683/downloadSupplementary)
Supplement: Supplementary file 1 [file downloadSupplementary]

## Sheet: Sheet 1
Table SIII. Correlation for the differential metabolites.
Metabolite name	6-Keto-decanoylcarnitine	Trimethadione	Salsolinol-1-carboxylic acid	Histidylproline	Norethindrone	Gibberellin A12 aldehyde	6-isopentenyladenine-9-β-D-glucopyranoside	Prostaglandin E2	Yucalexin B5	5,6-Dihydroxyprostaglandin F1a	α-Carboxy-δ-nonalactone	11-Dehydro-thromboxane B2	6,10a-Dihydroxy-4-(hydroxymethyl)-4,7,11b-trimethyl-1,2,3,4a,5,6,6a,7,11,11a-decahydronaphtho[2,1-][1]benzouran-9-one	5-(4-carboxy-3-methylbutyl)-5,6,8a-trimethyl-3-oxo-4a,6,7,8-tetrahydro-4H-naphthalene-1-carboxylic acid	Glutarylcarnitine	6-Butyltetrahydro-2H-pyran-2-one	PC(16:0/18:2)	(E)-2-(hydroxymethyl)-3-(3-oxo-5-propan-2-yl-4,5,6,7-tetrahydro-1H-2-benzofuran-4-yl)prop-2-enoic acid	5-Hydroxyflavone	Tricaproin	(S)-(4-Hydroxy-phenyl)-(S)-piperidin-2-yl-acetic acid methyl ester; hydrochloride	ethyl 2-(2-methylpropanoylamino)benzoate	Benzyladenine	Adipoylglycine	Fenoxycarb	7-[(2R,3S,4S)-4,6-dihydroxy-2-[(E,3S)-3-hydroxyoct-1-enyl]oxan-3-yl]heptanoic acid	(Z)-7-[(1R,2R,3R,5S)-2-(1,2-Dihydroxy-3-oxooctyl)-3,5-dihydroxycyclopentyl]hept-5-enoic acid	7-hydroxy-3-phenyl-8-(piperidylmethyl)chromen-4-one	15-Deacetylneosolaniol	2-Methyl-4-oxopentanedioic acid	Nona-3,5-dienoylcarnitine	Menthol-glucoronide	Cafestol	Befunolol	3-Methylazelaic acid	13,14-Dihydro PGF2a	Nivalenol	Aleuretic Acid	(E)-5-(1,2,4a,5-Tetramethyl-7-oxo-3,4,8,8a-tetrahydro-2H-naphthalen-1-yl)-3-methylpent-2-enoic acid	3-O-β-D-Galactopyranosyl-L-arabinose	Menisperine	Dobesilic acid	N-Acetylaspartic acid	Sinomenine	2'-O-Methylinosine	1,2,3,4-Tetrahydroisoquinoline-1-carboxylic acid	Nornicotine	Butyl 4-aminobenzoate	3-Methylpimelic acid
6-Keto-decanoylcarnitine	1	0.629289074264073	0.623343761182836	0.615509618697047	0.698895655513699	0.693707668298258	0.595855398165579	0.7565094400969	0.698306792245105	0.682120638624998	0.572325349773764	0.714192523593713	0.664587606573251	0.714199398686623	0.721511745537322	0.574240791663091	-0.548219402124941	0.701286330488966	0.684079718858148	0.690217193643694	0.694024618953726	0.71703631902767	0.611677936346849	0.492342633350217	0.649604077103563	0.696726796143401	0.703838392132041	0.675715190250658	0.490509139077023	0.571078101954811	0.700755860369138	0.54326565103318	0.692041579042896	0.584275340732309	0.605035465315339	0.574544945282957	0.538421984853717	0.664822457359371	0.746811600146966	0.649396850656541	0.672540924816158	0.639534941733174	0.608715147092802	0.557520915495535	0.677093538028475	0.700434174831835	0.687425973098831	0.617401929676283	0.548705353683075
Trimethadione	0.629289074264073	1	0.899692284703284	0.796461218060468	0.810946294896181	0.805986114069887	0.628521552286887	0.822750114311395	0.85210726625397	0.827596138846312	0.759930970864859	0.833876505139561	0.864560197779714	0.809018451522245	0.7823464004936	0.744715037601372	-0.586965155666139	0.756047155593607	0.696694986896816	0.662160017904605	0.826157775238801	0.626895451320586	0.936621726677506	0.810672108673667	0.91376934638301	0.766270185276641	0.722390294894825	0.833937433693009	0.63762651146769	0.644694181232572	0.733958906451182	0.790776347306257	0.684451489864784	0.682661526235595	0.849356631088182	0.612269576034473	0.619194449415296	0.783130054988119	0.71882862327791	0.658081737673056	0.665936667090795	0.578815545356016	0.478783864559784	0.80063894453044	0.685531464493028	0.773472062773225	0.792209148968533	0.764306419607458	0.671057387279389
Salsolinol-1-carboxylic acid	0.623343761182836	0.899692284703284	1	0.863344402428112	0.80768070640553	0.804559931501112	0.696622638233157	0.776447472428507	0.83423544678153	0.811748001478375	0.726041069067558	0.8536242633475	0.793153804125847	0.7404298832002	0.773682009521718	0.705002633422412	-0.577054642343698	0.816370757952509	0.755600563876076	0.703514575338893	0.856330403420396	0.631515156188467	0.852108219397904	0.766423984284581	0.865623220990672	0.78156496814181	0.769267003783209	0.844055975933613	0.705053818720461	0.682887880432306	0.7677617590963	0.774843059940634	0.762803343601042	0.772975543444275	0.758060383742976	0.655140079332404	0.646546850912287	0.731931067814209	0.672342103789917	0.689863213319953	0.717217637354516	0.658868035172494	0.560441766052871	0.786997538931504	0.733278353631437	0.788384630730908	0.785467193082836	0.731047208520944	0.705671853826478
Histidylproline	0.615509618697047	0.796461218060468	0.863344402428112	1	0.80593656501886	0.802277061688552	0.729366953348388	0.748236016469778	0.830568543906664	0.808639936233051	0.755759450813716	0.792809664509929	0.798290636813696	0.764310900566676	0.802670604991334	0.724390431664371	-0.485539787510455	0.816365377130999	0.768953495106693	0.66555311788578	0.81681542504439	0.631641838182665	0.757954920916217	0.811349767694214	0.81002492767125	0.775084266108366	0.756258909119758	0.750307900763977	0.746930899344865	0.660033834242917	0.769095339511347	0.627404945256056	0.720342991313375	0.764577478087893	0.714130907538964	0.656824842435288	0.618589354240442	0.784770166663806	0.734909747356313	0.697024457463337	0.736323454721338	0.63566105077748	0.521794785788064	0.807753737818227	0.707105341143664	0.755355201489034	0.745889403702943	0.751343344546475	0.6507532207282
Norethindrone	0.698895655513699	0.810946294896181	0.80768070640553	0.80593656501886	1	0.997963875415505	0.743426330750225	0.944983135767749	0.984277975168138	0.992466897036174	0.87399303157707	0.954303093461391	0.880325668854527	0.903526433573053	0.957171260762911	0.870301787602111	-0.561518956200764	0.932782272921508	0.921295574536509	0.675785684029498	0.932347594435053	0.740112212661524	0.784809822633905	0.684670372544984	0.875176934478092	0.97289298913015	0.908358418333272	0.873339633986247	0.770700645394745	0.719277540542316	0.95586191351054	0.669060232218323	0.861511238011111	0.885567716071553	0.879417575601425	0.688731681918786	0.483599133884202	0.901469946141627	0.890014686195828	0.856250261969024	0.905814555161992	0.772548492624485	0.544638017892213	0.824209726888144	0.912735824562583	0.894773199647182	0.853312131745521	0.837314471604182	0.748562040870136
Gibberellin A12 aldehyde	0.693707668298258	0.805986114069887	0.804559931501112	0.802277061688552	0.997963875415505	1	0.730914742076925	0.941173810453998	0.982156482607382	0.992254040173817	0.873626217969937	0.949797944998993	0.872165252322128	0.89939256796017	0.952892913408893	0.870302132257685	-0.557613025138952	0.932573728350713	0.917581310280686	0.669309292806466	0.928640921092399	0.746518363082402	0.775840910266171	0.682667888896023	0.865522895496873	0.973936769131809	0.896386448009685	0.870662703217376	0.770933982790362	0.714443854380824	0.953867135847608	0.668532073683606	0.848800311380671	0.882705526913162	0.87618090707739	0.692557120596022	0.481883015953923	0.898232410764149	0.888885849544749	0.86347655496547	0.905225430279262	0.764491278330152	0.527634739545583	0.815787131952215	0.910832412926995	0.885793167580154	0.842159075896948	0.834712277519129	0.746336267038317
6-isopentenyladenine-9-β-D-glucopyranoside	0.595855398165579	0.628521552286887	0.696622638233157	0.729366953348388	0.743426330750225	0.730914742076925	1	0.684786908726658	0.724056772128175	0.72218777243734	0.747565704210299	0.760375911945116	0.69493951070929	0.644688390398627	0.764209899545718	0.7077169359265	-0.591428378967995	0.739372842111697	0.753408287448489	0.635260225795726	0.730502324536104	0.508891824818912	0.571515724285549	0.633459115464383	0.657868942735885	0.75690135872688	0.813344410979718	0.721893764161477	0.841899199090548	0.682315191895392	0.794610040898379	0.521718643538056	0.795074121958732	0.812889763624395	0.623388057485306	0.638701795524688	0.537380428805706	0.671581703400724	0.698876188226577	0.680267181912984	0.767294696693002	0.781691088204421	0.764098981972251	0.669445087234749	0.768088196849732	0.684366491212655	0.740496439444007	0.56391633316058	0.765670416037062
Prostaglandin E2	0.7565094400969	0.822750114311395	0.776447472428507	0.748236016469778	0.944983135767749	0.941173810453998	0.684786908726658	1	0.934446405945953	0.950122708453627	0.858562149595523	0.909858154999158	0.904045376731485	0.924025423673963	0.915912105016811	0.853939272319691	-0.568682349897936	0.870193635463514	0.851198567573126	0.667316445876755	0.876033044149106	0.689111433717951	0.813439903202302	0.692920772776409	0.87309309207449	0.920879844830652	0.861844762817186	0.859124159760606	0.683665135620893	0.621669914385505	0.896348947832453	0.654627787872398	0.808880051939679	0.783242848192601	0.888092628557258	0.659960227903445	0.473430020120709	0.892906994829062	0.889761100829663	0.804346957460912	0.835607124423352	0.674767146627629	0.489465726947604	0.78013095307802	0.850079163812496	0.87577032363518	0.881209652854558	0.821514266978308	0.722378221905767
Yucalexin B5	0.698306792245105	0.85210726625397	0.83423544678153	0.830568543906664	0.984277975168138	0.982156482607382	0.724056772128175	0.934446405945953	1	0.988768591437213	0.860404807259017	0.955943634940019	0.916281881873077	0.922725987908189	0.964053253721473	0.853669299848174	-0.556274424244811	0.93538904921621	0.907438454034947	0.692877456199371	0.949432856709948	0.742461956019503	0.828069297368393	0.732094641594862	0.917834698691612	0.964336868841234	0.899183751496228	0.882660550449319	0.764773640842404	0.722945684879371	0.945749989688352	0.690828054852604	0.845236098544638	0.874873522040524	0.87718057251093	0.676309907133183	0.498926102519529	0.930945852207289	0.901161322894359	0.833548357493724	0.898871963126487	0.744877264886484	0.519880628094916	0.858768040901074	0.887037982957692	0.900831518054522	0.871273075637585	0.839914467906885	0.725682368173989
5,6-Dihydroxyprostaglandin F1a	0.682120638624998	0.827596138846312	0.811748001478375	0.808639936233051	0.992466897036174	0.992254040173817	0.72218777243734	0.950122708453627	0.988768591437213	1	0.884355432673947	0.95467258551125	0.907324630513304	0.916890233888301	0.957626722758708	0.879581230693252	-0.554988364016587	0.927531878528214	0.897803282585758	0.666334354265638	0.934328169926033	0.737117459547722	0.804470330932634	0.716206914843296	0.8963895624788	0.976319287089826	0.89418397258882	0.880953224232523	0.777281676497907	0.679553897104345	0.947542099218469	0.665806854157766	0.838281650542138	0.858967448210229	0.895656052893849	0.667820902343953	0.495626108448001	0.920747411465108	0.898543161832627	0.840298634252627	0.895488397569498	0.738924446977182	0.501384525541793	0.832060828346016	0.900274193577939	0.892538738316728	0.858372646894474	0.834561022714417	0.741823151276712
α-Carboxy-δ-nonalactone	0.572325349773764	0.759930970864859	0.726041069067558	0.755759450813716	0.87399303157707	0.873626217969937	0.747565704210299	0.858562149595523	0.860404807259017	0.884355432673947	1	0.809394430750606	0.880089125499769	0.801681904111465	0.85382450780768	0.988534039907129	-0.61456846765628	0.793382764928458	0.732338650138896	0.59142359183768	0.766555258455652	0.532493507960832	0.763391688160991	0.794520985474948	0.804015605616047	0.857517409034234	0.777986914519603	0.761285640933673	0.880932774449724	0.633947023627187	0.833677270040216	0.594920106300373	0.708729584831905	0.764369330187295	0.897461100558814	0.630122316084398	0.496010594326037	0.852562257854249	0.776652280301943	0.732201137606813	0.727030592157466	0.589181008974927	0.494023098903355	0.832417270399827	0.769379288741228	0.721596983673693	0.764548917028527	0.758120929743599	0.805213273122162
11-Dehydro-thromboxane B2	0.714192523593713	0.833876505139561	0.8536242633475	0.792809664509929	0.954303093461391	0.949797944998993	0.760375911945116	0.909858154999158	0.955943634940019	0.95467258551125	0.809394430750606	1	0.865081377212733	0.862149545084373	0.918116448525952	0.797870664765897	-0.549994076588879	0.92761068606887	0.8773193590512	0.734681094597966	0.966773054577339	0.733975196421859	0.810948563004919	0.650984722538037	0.903772685092625	0.968804422748496	0.93612847122582	0.936109747343021	0.772061622389468	0.70422956031735	0.950035006545143	0.734589496774931	0.905325725159282	0.888914074523567	0.845329065902914	0.667518522512689	0.555608500934341	0.885774090853316	0.876273467523079	0.820457786283171	0.907547180450514	0.819616895529727	0.609794536542702	0.800260593265074	0.932855152531374	0.899080699539395	0.897556676299133	0.778965754478057	0.803709355707329
6,10a-Dihydroxy-4-(hydroxymethyl)-4,7,11b-trimethyl-1,2,3,4a,5,6,6a,7,11,11a-decahydronaphtho[2,1-][1]benzouran-9-one	0.664587606573251	0.864560197779714	0.793153804125847	0.798290636813696	0.880325668854527	0.872165252322128	0.69493951070929	0.904045376731485	0.916281881873077	0.907324630513304	0.880089125499769	0.865081377212733	1	0.913123149448336	0.907941128636198	0.86812117232948	-0.574474199118895	0.811808231385682	0.775975528859038	0.67545450047429	0.848983593366323	0.596047304933502	0.895340384596887	0.807501751851871	0.936818528211894	0.86915674213852	0.8317456075241	0.813952889323001	0.740247695175287	0.622773268296957	0.834385448853281	0.599916753407601	0.756439083397574	0.726130405916508	0.894645167044705	0.586820202827873	0.496687389234086	0.91754694891784	0.844642394473459	0.68191719998257	0.740746759524181	0.623356539192939	0.490749721178453	0.880372065978025	0.743455084233539	0.847778430778285	0.847587982689799	0.791808794977749	0.695145995761434
5-(4-carboxy-3-methylbutyl)-5,6,8a-trimethyl-3-oxo-4a,6,7,8-tetrahydro-4H-naphthalene-1-carboxylic acid	0.714199398686623	0.809018451522245	0.7404298832002	0.764310900566676	0.903526433573053	0.89939256796017	0.644688390398627	0.924025423673963	0.922725987908189	0.916890233888301	0.801681904111465	0.862149545084373	0.913123149448336	1	0.927065462618893	0.801077565698875	-0.577752043034325	0.863611104179266	0.857019561254599	0.678426188610681	0.837857205788773	0.717523659892696	0.806821572861622	0.740659109563246	0.85188653329936	0.866972997225946	0.80875179898158	0.760761589931078	0.621147809426549	0.667851786883708	0.827361608177991	0.635259120796177	0.753067054039226	0.735936477658999	0.821913326396417	0.666885513694087	0.445813313973599	0.900054669306631	0.87938816488515	0.766250513408218	0.778365661385339	0.661251161439582	0.440474587603779	0.794865043619751	0.762937541086307	0.87953375972355	0.785162185827428	0.817686783173253	0.623966986673278
Glutarylcarnitine	0.721511745537322	0.7823464004936	0.773682009521718	0.802670604991334	0.957171260762911	0.952892913408893	0.764209899545718	0.915912105016811	0.964053253721473	0.957626722758708	0.85382450780768	0.918116448525952	0.907941128636198	0.927065462618893	1	0.845907000945172	-0.546699422528995	0.923843245246181	0.922752343081831	0.722255457270114	0.891419560869385	0.695706372857943	0.796376640531591	0.702103804036911	0.878893864690374	0.941659163131887	0.92050680136735	0.826581267089755	0.745009942742705	0.747316684214623	0.941963948503043	0.613383974722056	0.873589038649503	0.857053014692846	0.859869689095078	0.694160153486726	0.393583829084171	0.927970695026788	0.91244696207776	0.846769116096951	0.879976898076058	0.794726908189868	0.585787861372124	0.871671184952735	0.884988746255791	0.912750336306778	0.827597594124277	0.849715647134635	0.743513668828942
6-Butyltetrahydro-2H-pyran-2-one	0.574240791663091	0.744715037601372	0.705002633422412	0.724390431664371	0.870301787602111	0.870302132257685	0.7077169359265	0.853939272319691	0.853669299848174	0.879581230693252	0.988534039907129	0.797870664765897	0.86812117232948	0.801077565698875	0.845907000945172	1	-0.610634533993665	0.789930099112883	0.729839598681541	0.597610207252154	0.752478164512915	0.537186526289934	0.757356167930522	0.760372533831979	0.790514438711312	0.845355154867292	0.761600801719754	0.744911141242167	0.84742267109075	0.632746077854324	0.819491004450988	0.600597593590341	0.692128620928358	0.74916135888437	0.896108071822545	0.650891736304943	0.460063028404541	0.85787442734703	0.766462710519211	0.729256032792476	0.720729952191042	0.577837766855008	0.467779922874976	0.818326758983451	0.754114415953125	0.715528798527002	0.747640809155721	0.76842898820908	0.786676064128855
PC(16:0/18:2)	-0.548219402124941	-0.586965155666139	-0.577054642343698	-0.485539787510455	-0.561518956200764	-0.557613025138952	-0.591428378967995	-0.568682349897936	-0.556274424244811	-0.554988364016587	-0.61456846765628	-0.549994076588879	-0.574474199118895	-0.577752043034325	-0.546699422528995	-0.610634533993665	1	-0.528409454763758	-0.523692132552387	-0.535638069943775	-0.521183113493134	-0.532220638459871	-0.529637411806193	-0.548419763029423	-0.497944104520718	-0.508214142197475	-0.5076670565809	-0.543487105954929	-0.545857200930171	-0.555955577138706	-0.499380482417145	-0.576497457422136	-0.514467417261598	-0.537350010760435	-0.544128169608746	-0.579880513271845	-0.511341933765513	-0.502144212632031	-0.48555736181963	-0.497575640593794	-0.49711789675172	-0.466305273929134	-0.514703797107399	-0.476539950402002	-0.486942844111639	-0.471397671863571	-0.501799742071406	-0.482729932032707	-0.551443397693545
(E)-2-(hydroxymethyl)-3-(3-oxo-5-propan-2-yl-4,5,6,7-tetrahydro-1H-2-benzofuran-4-yl)prop-2-enoic acid	0.701286330488966	0.756047155593607	0.816370757952509	0.816365377130999	0.932782272921508	0.932573728350713	0.739372842111697	0.870193635463514	0.93538904921621	0.927531878528214	0.793382764928458	0.92761068606887	0.811808231385682	0.863611104179266	0.923843245246181	0.789930099112883	-0.528409454763758	1	0.924340213613151	0.718088641419446	0.902313186597623	0.727574417883549	0.718951048873712	0.691628574707509	0.813689342553144	0.928348738057223	0.888821846014841	0.849907621777801	0.746201514235608	0.761666743336817	0.920340633335287	0.718031964418092	0.855246688540181	0.911448794938704	0.767269723293515	0.730042338007562	0.440819069326173	0.867104013664745	0.846497674864211	0.885494630721683	0.911169857601263	0.802109584789865	0.566786575026131	0.824245252285034	0.899038118439489	0.869865828913908	0.82048605886674	0.78118403753033	0.746550525971216
5-Hydroxyflavone	0.684079718858148	0.696694986896816	0.755600563876076	0.768953495106693	0.921295574536509	0.917581310280686	0.753408287448489	0.851198567573126	0.907438454034947	0.897803282585758	0.732338650138896	0.8773193590512	0.775975528859038	0.857019561254599	0.922752343081831	0.729839598681541	-0.523692132552387	0.924340213613151	1	0.671279533672791	0.853150200902107	0.722579819870335	0.665122422339679	0.596165744514215	0.75437071365063	0.881013377696987	0.885583393485674	0.763663604004847	0.668019039022944	0.784867487171829	0.891749826534331	0.605691006992676	0.866978881500904	0.874220101328223	0.705512016835454	0.734457715604126	0.378501115610835	0.822724493330328	0.821188881743569	0.851260230475742	0.886613276802483	0.839861920180131	0.608272958734258	0.752652485427572	0.863221303406848	0.874617320800353	0.748311600907867	0.776979826286335	0.643719739287006
Tricaproin	0.690217193643694	0.662160017904605	0.703514575338893	0.66555311788578	0.675785684029498	0.669309292806466	0.635260225795726	0.667316445876755	0.692877456199371	0.666334354265638	0.59142359183768	0.734681094597966	0.67545450047429	0.678426188610681	0.722255457270114	0.597610207252154	-0.535638069943775	0.718088641419446	0.671279533672791	1	0.691833222913021	0.566340599587556	0.672591000853379	0.508728581540492	0.677435857428622	0.665820254267873	0.719309702291393	0.667047680239544	0.553652295404936	0.686641496166756	0.685494864447075	0.687222737810401	0.722162980610181	0.680930590620713	0.626577510579037	0.711241838555287	0.39693964817843	0.700741990286747	0.685755391081669	0.655775119719353	0.683202481434	0.693843528435336	0.627110157457799	0.63379802938489	0.679791921273343	0.689832671074052	0.663357928944139	0.693058220782158	0.717086306742104
(S)-(4-Hydroxy-phenyl)-(S)-piperidin-2-yl-acetic acid methyl ester; hydrochloride	0.694024618953726	0.826157775238801	0.856330403420396	0.81681542504439	0.932347594435053	0.928640921092399	0.730502324536104	0.876033044149106	0.949432856709948	0.934328169926033	0.766555258455652	0.966773054577339	0.848983593366323	0.837857205788773	0.891419560869385	0.752478164512915	-0.521183113493134	0.902313186597623	0.853150200902107	0.691833222913021	1	0.735572635492322	0.789910343614508	0.645623459961931	0.907260832152371	0.942148952965501	0.911229547464748	0.918712465047325	0.752213890448662	0.689884907152846	0.941573654975118	0.674246686442237	0.883037636532457	0.86012285619188	0.802506674105364	0.602756943801498	0.589459664896387	0.867614537611455	0.869829537155088	0.757387461461258	0.90545321467761	0.775227079707955	0.57515153218918	0.788602571997816	0.88579004294118	0.869549437705792	0.897615539546217	0.732066764567746	0.704599476929769
ethyl 2-(2-methylpropanoylamino)benzoate	0.71703631902767	0.626895451320586	0.631515156188467	0.631641838182665	0.740112212661524	0.746518363082402	0.508891824818912	0.689111433717951	0.742461956019503	0.737117459547722	0.532493507960832	0.733975196421859	0.596047304933502	0.717523659892696	0.695706372857943	0.537186526289934	-0.532220638459871	0.727574417883549	0.722579819870335	0.566340599587556	0.735572635492322	1	0.562552420385194	0.509257254791668	0.618888126038461	0.707477528528754	0.620192341045208	0.64677237394689	0.503075465439195	0.544271629116026	0.670643797581457	0.621036243838029	0.603680755397785	0.684269545786458	0.5773929057136	0.589775991258241	0.658296369201431	0.64869039277844	0.660607881323156	0.705389934925885	0.739969003620313	0.610516459020007	0.414693714206102	0.542079268895227	0.680629825575944	0.674192494586491	0.607879952706301	0.61509148679592	0.517963237684998
Benzyladenine	0.611677936346849	0.936621726677506	0.852108219397904	0.757954920916217	0.784809822633905	0.775840910266171	0.571515724285549	0.813439903202302	0.828069297368393	0.804470330932634	0.763391688160991	0.810948563004919	0.895340384596887	0.806821572861622	0.796376640531591	0.757356167930522	-0.529637411806193	0.718951048873712	0.665122422339679	0.672591000853379	0.789910343614508	0.562552420385194	1	0.76886403130461	0.947906266905266	0.743764969478663	0.737382020041137	0.818255612212818	0.602687811735472	0.628818284562958	0.716440467321801	0.72786488436867	0.688877074276482	0.646720959467918	0.884165288890081	0.55312518598167	0.51128729605928	0.811538441239943	0.71719575836079	0.633534765119666	0.616486091558788	0.573274269344485	0.466245109079065	0.859524807371867	0.654777295564933	0.802170019724333	0.802218167717765	0.797852834014457	0.694839681526078
Adipoylglycine	0.492342633350217	0.810672108673667	0.766423984284581	0.811349767694214	0.684670372544984	0.682667888896023	0.633459115464383	0.692920772776409	0.732094641594862	0.716206914843296	0.794520985474948	0.650984722538037	0.807501751851871	0.740659109563246	0.702103804036911	0.760372533831979	-0.548419763029423	0.691628574707509	0.596165744514215	0.508728581540492	0.645623459961931	0.509257254791668	0.76886403130461	1	0.75925682095497	0.648450987148702	0.562098234881138	0.630204851609516	0.73674529689734	0.499647515386121	0.601238519460731	0.601106713847561	0.496293779246898	0.617758210948166	0.706737225535688	0.544012609242297	0.610099099989733	0.704008477273248	0.610222913968915	0.575466065325199	0.532110891413779	0.401831681249031	0.335593099170444	0.813299347005577	0.520649066351064	0.614030007676929	0.649402171797951	0.615748750410377	0.59305528024025
Fenoxycarb	0.649604077103563	0.91376934638301	0.865623220990672	0.81002492767125	0.875176934478092	0.865522895496873	0.657868942735885	0.87309309207449	0.917834698691612	0.8963895624788	0.804015605616047	0.903772685092625	0.936818528211894	0.85188653329936	0.878893864690374	0.790514438711312	-0.497944104520718	0.813689342553144	0.75437071365063	0.677435857428622	0.907260832152371	0.618888126038461	0.947906266905266	0.75925682095497	1	0.863657754454025	0.852978845186834	0.892422376469211	0.700958300768877	0.627796246109664	0.852472569983152	0.667500865523055	0.798082808578194	0.741647695633988	0.887304958627422	0.528432440293677	0.533518828997651	0.878998139580728	0.838964388606256	0.686362047106306	0.760395081539241	0.66063798496252	0.513174770339864	0.889846055273952	0.776194368654876	0.874546320498832	0.886116341380842	0.780460578220853	0.699062613816571
7-[(2R,3S,4S)-4,6-dihydroxy-2-[(E,3S)-3-hydroxyoct-1-enyl]oxan-3-yl]heptanoic acid	0.696726796143401	0.766270185276641	0.78156496814181	0.775084266108366	0.97289298913015	0.973936769131809	0.75690135872688	0.920879844830652	0.964336868841234	0.976319287089826	0.857517409034234	0.968804422748496	0.86915674213852	0.866972997225946	0.941659163131887	0.845355154867292	-0.508214142197475	0.928348738057223	0.881013377696987	0.665820254267873	0.942148952965501	0.707477528528754	0.743764969478663	0.648450987148702	0.863657754454025	1	0.91905675978235	0.896003355754533	0.80963396562973	0.66107251534367	0.973909405131504	0.627544103355912	0.871541521107701	0.881497801927287	0.856697289589331	0.646403991702436	0.493386445249007	0.902669859540757	0.901842325641225	0.83286021268509	0.915908235566651	0.778519843189906	0.548823442940018	0.792397956287928	0.938492456955743	0.882090165737675	0.87013975077089	0.774976271606935	0.782971874499561
(Z)-7-[(1R,2R,3R,5S)-2-(1,2-Dihydroxy-3-oxooctyl)-3,5-dihydroxycyclopentyl]hept-5-enoic acid	0.703838392132041	0.722390294894825	0.769267003783209	0.756258909119758	0.908358418333272	0.896386448009685	0.813344410979718	0.861844762817186	0.899183751496228	0.89418397258882	0.777986914519603	0.93612847122582	0.8317456075241	0.80875179898158	0.92050680136735	0.761600801719754	-0.5076670565809	0.888821846014841	0.885583393485674	0.719309702291393	0.911229547464748	0.620192341045208	0.737382020041137	0.562098234881138	0.852978845186834	0.91905675978235	1	0.865502866872092	0.753572553591663	0.727075375932602	0.957569456751019	0.565512109768862	0.976101489703947	0.858410473594468	0.774067994161316	0.60402341169365	0.402153553018653	0.841871788478345	0.861401079663932	0.771662974413851	0.885488961032456	0.8911996012468	0.761284458086146	0.80580078208826	0.921570687414239	0.875864031521456	0.851154764388055	0.743375450619682	0.754210571121266
7-hydroxy-3-phenyl-8-(piperidylmethyl)chromen-4-one	0.675715190250658	0.833937433693009	0.844055975933613	0.750307900763977	0.873339633986247	0.870662703217376	0.721893764161477	0.859124159760606	0.882660550449319	0.880953224232523	0.761285640933673	0.936109747343021	0.813952889323001	0.760761589931078	0.826581267089755	0.744911141242167	-0.543487105954929	0.849907621777801	0.763663604004847	0.667047680239544	0.918712465047325	0.64677237394689	0.818255612212818	0.630204851609516	0.892422376469211	0.896003355754533	0.865502866872092	1	0.739559621932991	0.609705324699912	0.889107688182893	0.726713359530715	0.837384205804501	0.81332274888485	0.820871305215947	0.60398874543666	0.556643495792361	0.82290543987042	0.830179649322104	0.743689036053773	0.854808100337883	0.73592399040305	0.561387024482047	0.763172954854506	0.857257687732194	0.828606605856933	0.912225031668841	0.699969232609431	0.788645272934629
15-Deacetylneosolaniol	0.490509139077023	0.63762651146769	0.705053818720461	0.746930899344865	0.770700645394745	0.770933982790362	0.841899199090548	0.683665135620893	0.764773640842404	0.777281676497907	0.880932774449724	0.772061622389468	0.740247695175287	0.621147809426549	0.745009942742705	0.84742267109075	-0.545857200930171	0.746201514235608	0.668019039022944	0.553652295404936	0.752213890448662	0.503075465439195	0.602687811735472	0.73674529689734	0.700958300768877	0.80963396562973	0.753572553591663	0.739559621932991	1	0.578679022065341	0.806128538883357	0.515806255854554	0.706888841232967	0.801372161034445	0.697739548190304	0.53760823291898	0.608983849582122	0.713435043656216	0.674662749843405	0.652365979874166	0.731918020673214	0.645096191305209	0.598365764318033	0.742153924438759	0.76551193170361	0.617644537453179	0.717355846327568	0.558972760092896	0.791705435779408
2-Methyl-4-oxopentanedioic acid	0.571078101954811	0.644694181232572	0.682887880432306	0.660033834242917	0.719277540542316	0.714443854380824	0.682315191895392	0.621669914385505	0.722945684879371	0.679553897104345	0.633947023627187	0.70422956031735	0.622773268296957	0.667851786883708	0.747316684214623	0.632746077854324	-0.555955577138706	0.761666743336817	0.784867487171829	0.686641496166756	0.689884907152846	0.544271629116026	0.628818284562958	0.499647515386121	0.627796246109664	0.66107251534367	0.727075375932602	0.609705324699912	0.578679022065341	1	0.710099410505329	0.663555994509857	0.721655175722271	0.775124055940073	0.606857356120446	0.715981121515294	0.310013970598545	0.672275508006935	0.608228250296868	0.700309731482055	0.691177939520355	0.776666688688957	0.677051399507307	0.695785571149752	0.669667417098157	0.691883841060721	0.601840520332823	0.692045737170459	0.647900924706976
Nona-3,5-dienoylcarnitine	0.700755860369138	0.733958906451182	0.7677617590963	0.769095339511347	0.95586191351054	0.953867135847608	0.794610040898379	0.896348947832453	0.945749989688352	0.947542099218469	0.833677270040216	0.950035006545143	0.834385448853281	0.827361608177991	0.941963948503043	0.819491004450988	-0.499380482417145	0.920340633335287	0.891749826534331	0.685494864447075	0.941573654975118	0.670643797581457	0.716440467321801	0.601238519460731	0.852472569983152	0.973909405131504	0.957569456751019	0.889107688182893	0.806128538883357	0.710099410505329	1	0.580573876237338	0.92384332722613	0.899478358021551	0.81733295877047	0.632274918789941	0.438300442106912	0.880978091483267	0.907682199365701	0.818184324569663	0.938793119043678	0.825606654952864	0.646758249854513	0.800369148940924	0.945888165845612	0.874973511775768	0.874637309242736	0.758757045052518	0.771015360041005
Menthol-glucoronide	0.54326565103318	0.790776347306257	0.774843059940634	0.627404945256056	0.669060232218323	0.668532073683606	0.521718643538056	0.654627787872398	0.690828054852604	0.665806854157766	0.594920106300373	0.734589496774931	0.599916753407601	0.635259120796177	0.613383974722056	0.600597593590341	-0.576497457422136	0.718031964418092	0.605691006992676	0.687222737810401	0.674246686442237	0.621036243838029	0.72786488436867	0.601106713847561	0.667500865523055	0.627544103355912	0.565512109768862	0.726713359530715	0.515806255854554	0.663555994509857	0.580573876237338	1	0.553541829407803	0.691949701047383	0.659445735665433	0.73294799216844	0.526903673771196	0.633952727063803	0.523087209290042	0.73354112149105	0.627063856824021	0.539889941224208	0.393017717966382	0.606512035519246	0.647261384060284	0.586515531575035	0.65393084439917	0.675213036745035	0.729134700778241
Cafestol	0.692041579042896	0.684451489864784	0.762803343601042	0.720342991313375	0.861511238011111	0.848800311380671	0.795074121958732	0.808880051939679	0.845236098544638	0.838281650542138	0.708729584831905	0.905325725159282	0.756439083397574	0.753067054039226	0.873589038649503	0.692128620928358	-0.514467417261598	0.855246688540181	0.866978881500904	0.722162980610181	0.883037636532457	0.603680755397785	0.688877074276482	0.496293779246898	0.798082808578194	0.871541521107701	0.976101489703947	0.837384205804501	0.706888841232967	0.721655175722271	0.92384332722613	0.553541829407803	1	0.830660144650769	0.712268711770323	0.599079967004919	0.411355858083947	0.767292837539928	0.815123037838018	0.734511608025183	0.849779892530402	0.903616157637213	0.809714004669485	0.743388749023306	0.907752138647147	0.841202242423631	0.801846978972551	0.691382468556241	0.733741317831422
Befunolol	0.584275340732309	0.682661526235595	0.772975543444275	0.764577478087893	0.885567716071553	0.882705526913162	0.812889763624395	0.783242848192601	0.874873522040524	0.858967448210229	0.764369330187295	0.888914074523567	0.726130405916508	0.735936477658999	0.857053014692846	0.74916135888437	-0.537350010760435	0.911448794938704	0.874220101328223	0.680930590620713	0.86012285619188	0.684269545786458	0.646720959467918	0.617758210948166	0.741647695633988	0.881497801927287	0.858410473594468	0.81332274888485	0.801372161034445	0.775124055940073	0.899478358021551	0.691949701047383	0.830660144650769	1	0.714850835489645	0.736500394230855	0.448524227655728	0.79013905807381	0.753505186552376	0.85665433535401	0.915611447220096	0.801923357621467	0.614377224932089	0.780322690984641	0.891656453005147	0.78916422109431	0.813771737034648	0.725504329212297	0.818156637332249
3-Methylazelaic acid	0.605035465315339	0.849356631088182	0.758060383742976	0.714130907538964	0.879417575601425	0.87618090707739	0.623388057485306	0.888092628557258	0.87718057251093	0.895656052893849	0.897461100558814	0.845329065902914	0.894645167044705	0.821913326396417	0.859869689095078	0.896108071822545	-0.544128169608746	0.767269723293515	0.705512016835454	0.626577510579037	0.802506674105364	0.5773929057136	0.884165288890081	0.706737225535688	0.887304958627422	0.856697289589331	0.774067994161316	0.820871305215947	0.697739548190304	0.606857356120446	0.81733295877047	0.659445735665433	0.712268711770323	0.714850835489645	1	0.627427474611141	0.443879191924349	0.874346759256226	0.79314877136697	0.736185075325988	0.715810585264872	0.572261680283608	0.419504948433095	0.834945370463929	0.776750475284124	0.796904897980094	0.81168261999642	0.858102835915626	0.797286852804575
13,14-Dihydro PGF2a	0.574544945282957	0.612269576034473	0.655140079332404	0.656824842435288	0.688731681918786	0.692557120596022	0.638701795524688	0.659960227903445	0.676309907133183	0.667820902343953	0.630122316084398	0.667518522512689	0.586820202827873	0.666885513694087	0.694160153486726	0.650891736304943	-0.579880513271845	0.730042338007562	0.734457715604126	0.711241838555287	0.602756943801498	0.589775991258241	0.55312518598167	0.544012609242297	0.528432440293677	0.646403991702436	0.60402341169365	0.60398874543666	0.53760823291898	0.715981121515294	0.632274918789941	0.73294799216844	0.599079967004919	0.736500394230855	0.627427474611141	1	0.373269000945991	0.709208895888027	0.590324691130681	0.748809442023604	0.696903536846619	0.628513342467003	0.458509453156018	0.576409742835861	0.646505019714296	0.612223270409315	0.570765112074891	0.741672096500903	0.738767390302976
Nivalenol	0.538421984853717	0.619194449415296	0.646546850912287	0.618589354240442	0.483599133884202	0.481883015953923	0.537380428805706	0.473430020120709	0.498926102519529	0.495626108448001	0.496010594326037	0.555608500934341	0.496687389234086	0.445813313973599	0.393583829084171	0.460063028404541	-0.511341933765513	0.440819069326173	0.378501115610835	0.39693964817843	0.589459664896387	0.658296369201431	0.51128729605928	0.610099099989733	0.533518828997651	0.493386445249007	0.402153553018653	0.556643495792361	0.608983849582122	0.310013970598545	0.438300442106912	0.526903673771196	0.411355858083947	0.448524227655728	0.443879191924349	0.373269000945991	1	0.41004837865376	0.401672749584819	0.354703747275189	0.437944011910846	0.358567992736049	0.393122119570976	0.384049738685869	0.429464982091437	0.40767543177911	0.528196211103446	0.329739413373456	0.477173495142426
Aleuretic Acid	0.664822457359371	0.783130054988119	0.731931067814209	0.784770166663806	0.901469946141627	0.898232410764149	0.671581703400724	0.892906994829062	0.930945852207289	0.920747411465108	0.852562257854249	0.885774090853316	0.91754694891784	0.900054669306631	0.927970695026788	0.85787442734703	-0.502144212632031	0.867104013664745	0.822724493330328	0.700741990286747	0.867614537611455	0.64869039277844	0.811538441239943	0.704008477273248	0.878998139580728	0.902669859540757	0.841871788478345	0.82290543987042	0.713435043656216	0.672275508006935	0.880978091483267	0.633952727063803	0.767292837539928	0.79013905807381	0.874346759256226	0.709208895888027	0.41004837865376	1	0.908903020573604	0.753364905200418	0.852715534388149	0.673168623948255	0.43395577112462	0.832624881358392	0.795366826380789	0.858934253185845	0.857430366593754	0.805976381754886	0.74631161938698
(E)-5-(1,2,4a,5-Tetramethyl-7-oxo-3,4,8,8a-tetrahydro-2H-naphthalen-1-yl)-3-methylpent-2-enoic acid	0.746811600146966	0.71882862327791	0.672342103789917	0.734909747356313	0.890014686195828	0.888885849544749	0.698876188226577	0.889761100829663	0.901161322894359	0.898543161832627	0.776652280301943	0.876273467523079	0.844642394473459	0.87938816488515	0.91244696207776	0.766462710519211	-0.48555736181963	0.846497674864211	0.821188881743569	0.685755391081669	0.869829537155088	0.660607881323156	0.71719575836079	0.610222913968915	0.838964388606256	0.901842325641225	0.861401079663932	0.830179649322104	0.674662749843405	0.608228250296868	0.907682199365701	0.523087209290042	0.815123037838018	0.753505186552376	0.79314877136697	0.590324691130681	0.401672749584819	0.908903020573604	1	0.753396437788221	0.86967511182892	0.726928494939497	0.497009863551165	0.743893951397576	0.833117632275286	0.866905538205239	0.833053949869537	0.720516452556911	0.656486877050234
3-O-β-D-Galactopyranosyl-L-arabinose	0.649396850656541	0.658081737673056	0.689863213319953	0.697024457463337	0.856250261969024	0.86347655496547	0.680267181912984	0.804346957460912	0.833548357493724	0.840298634252627	0.732201137606813	0.820457786283171	0.68191719998257	0.766250513408218	0.846769116096951	0.729256032792476	-0.497575640593794	0.885494630721683	0.851260230475742	0.655775119719353	0.757387461461258	0.705389934925885	0.633534765119666	0.575466065325199	0.686362047106306	0.83286021268509	0.771662974413851	0.743689036053773	0.652365979874166	0.700309731482055	0.818184324569663	0.73354112149105	0.734511608025183	0.85665433535401	0.736185075325988	0.748809442023604	0.354703747275189	0.753364905200418	0.753396437788221	1	0.844184829318338	0.741835532788863	0.492161467212154	0.727038396074945	0.893880612021888	0.749730771234988	0.706644091766271	0.803731296341773	0.750289475649188
Menisperine	0.672540924816158	0.665936667090795	0.717217637354516	0.736323454721338	0.905814555161992	0.905225430279262	0.767294696693002	0.835607124423352	0.898871963126487	0.895488397569498	0.727030592157466	0.907547180450514	0.740746759524181	0.778365661385339	0.879976898076058	0.720729952191042	-0.49711789675172	0.911169857601263	0.886613276802483	0.683202481434	0.90545321467761	0.739969003620313	0.616486091558788	0.532110891413779	0.760395081539241	0.915908235566651	0.885488961032456	0.854808100337883	0.731918020673214	0.691177939520355	0.938793119043678	0.627063856824021	0.849779892530402	0.915611447220096	0.715810585264872	0.696903536846619	0.437944011910846	0.852715534388149	0.86967511182892	0.844184829318338	1	0.807740066534127	0.571457338069317	0.704362696033279	0.913838793303135	0.827390458366385	0.859410096653171	0.698744810867738	0.727671127551089
Dobesilic acid	0.639534941733174	0.578815545356016	0.658868035172494	0.63566105077748	0.772548492624485	0.764491278330152	0.781691088204421	0.674767146627629	0.744877264886484	0.738924446977182	0.589181008974927	0.819616895529727	0.623356539192939	0.661251161439582	0.794726908189868	0.577837766855008	-0.466305273929134	0.802109584789865	0.839861920180131	0.693843528435336	0.775227079707955	0.610516459020007	0.573274269344485	0.401831681249031	0.66063798496252	0.778519843189906	0.8911996012468	0.73592399040305	0.645096191305209	0.776666688688957	0.825606654952864	0.539889941224208	0.903616157637213	0.801923357621467	0.572261680283608	0.628513342467003	0.358567992736049	0.673168623948255	0.726928494939497	0.741835532788863	0.807740066534127	1	0.821881932856831	0.648113833454886	0.843380450653336	0.777299397452419	0.655141806181474	0.614975673919176	0.695611712152107
N-Acetylaspartic acid	0.608715147092802	0.478783864559784	0.560441766052871	0.521794785788064	0.544638017892213	0.527634739545583	0.764098981972251	0.489465726947604	0.519880628094916	0.501384525541793	0.494023098903355	0.609794536542702	0.490749721178453	0.440474587603779	0.585787861372124	0.467779922874976	-0.514703797107399	0.566786575026131	0.608272958734258	0.627110157457799	0.57515153218918	0.414693714206102	0.466245109079065	0.335593099170444	0.513174770339864	0.548823442940018	0.761284458086146	0.561387024482047	0.598365764318033	0.677051399507307	0.646758249854513	0.393017717966382	0.809714004669485	0.614377224932089	0.419504948433095	0.458509453156018	0.393122119570976	0.43395577112462	0.497009863551165	0.492161467212154	0.571457338069317	0.821881932856831	1	0.507494449549925	0.657378941143516	0.533999148862901	0.509750701275756	0.434196866815215	0.60791122107626
Sinomenine	0.557520915495535	0.80063894453044	0.786997538931504	0.807753737818227	0.824209726888144	0.815787131952215	0.669445087234749	0.78013095307802	0.858768040901074	0.832060828346016	0.832417270399827	0.800260593265074	0.880372065978025	0.794865043619751	0.871671184952735	0.818326758983451	-0.476539950402002	0.824245252285034	0.752652485427572	0.63379802938489	0.788602571997816	0.542079268895227	0.859524807371867	0.813299347005577	0.889846055273952	0.792397956287928	0.80580078208826	0.763172954854506	0.742153924438759	0.695785571149752	0.800369148940924	0.606512035519246	0.743388749023306	0.780322690984641	0.834945370463929	0.576409742835861	0.384049738685869	0.832624881358392	0.743893951397576	0.727038396074945	0.704362696033279	0.648113833454886	0.507494449549925	1	0.728765356583918	0.801384149077684	0.773054272815809	0.79084449381172	0.706714006686973
2'-O-Methylinosine	0.677093538028475	0.685531464493028	0.733278353631437	0.707105341143664	0.912735824562583	0.910832412926995	0.768088196849732	0.850079163812496	0.887037982957692	0.900274193577939	0.769379288741228	0.932855152531374	0.743455084233539	0.762937541086307	0.884988746255791	0.754114415953125	-0.486942844111639	0.899038118439489	0.863221303406848	0.679791921273343	0.88579004294118	0.680629825575944	0.654777295564933	0.520649066351064	0.776194368654876	0.938492456955743	0.921570687414239	0.857257687732194	0.76551193170361	0.669667417098157	0.945888165845612	0.647261384060284	0.907752138647147	0.891656453005147	0.776750475284124	0.646505019714296	0.429464982091437	0.795366826380789	0.833117632275286	0.893880612021888	0.913838793303135	0.843380450653336	0.657378941143516	0.728765356583918	1	0.814082630522395	0.814885027874334	0.743948763310606	0.80172619665323
1,2,3,4-Tetrahydroisoquinoline-1-carboxylic acid	0.700434174831835	0.773472062773225	0.788384630730908	0.755355201489034	0.894773199647182	0.885793167580154	0.684366491212655	0.87577032363518	0.900831518054522	0.892538738316728	0.721596983673693	0.899080699539395	0.847778430778285	0.87953375972355	0.912750336306778	0.715528798527002	-0.471397671863571	0.869865828913908	0.874617320800353	0.689832671074052	0.869549437705792	0.674192494586491	0.802170019724333	0.614030007676929	0.874546320498832	0.882090165737675	0.875864031521456	0.828606605856933	0.617644537453179	0.691883841060721	0.874973511775768	0.586515531575035	0.841202242423631	0.78916422109431	0.796904897980094	0.612223270409315	0.40767543177911	0.858934253185845	0.866905538205239	0.749730771234988	0.827390458366385	0.777299397452419	0.533999148862901	0.801384149077684	0.814082630522395	1	0.835187075994752	0.791546100163963	0.667550457034113
Nornicotine	0.687425973098831	0.792209148968533	0.785467193082836	0.745889403702943	0.853312131745521	0.842159075896948	0.740496439444007	0.881209652854558	0.871273075637585	0.858372646894474	0.764548917028527	0.897556676299133	0.847587982689799	0.785162185827428	0.827597594124277	0.747640809155721	-0.501799742071406	0.82048605886674	0.748311600907867	0.663357928944139	0.897615539546217	0.607879952706301	0.802218167717765	0.649402171797951	0.886116341380842	0.87013975077089	0.851154764388055	0.912225031668841	0.717355846327568	0.601840520332823	0.874637309242736	0.65393084439917	0.801846978972551	0.813771737034648	0.81168261999642	0.570765112074891	0.528196211103446	0.857430366593754	0.833053949869537	0.706644091766271	0.859410096653171	0.655141806181474	0.509750701275756	0.773054272815809	0.814885027874334	0.835187075994752	1	0.675736289097694	0.751669717032183
Butyl 4-aminobenzoate	0.617401929676283	0.764306419607458	0.731047208520944	0.751343344546475	0.837314471604182	0.834712277519129	0.56391633316058	0.821514266978308	0.839914467906885	0.834561022714417	0.758120929743599	0.778965754478057	0.791808794977749	0.817686783173253	0.849715647134635	0.76842898820908	-0.482729932032707	0.78118403753033	0.776979826286335	0.693058220782158	0.732066764567746	0.61509148679592	0.797852834014457	0.615748750410377	0.780460578220853	0.774976271606935	0.743375450619682	0.699969232609431	0.558972760092896	0.692045737170459	0.758757045052518	0.675213036745035	0.691382468556241	0.725504329212297	0.858102835915626	0.741672096500903	0.329739413373456	0.805976381754886	0.720516452556911	0.803731296341773	0.698744810867738	0.614975673919176	0.434196866815215	0.79084449381172	0.743948763310606	0.791546100163963	0.675736289097694	1	0.691878511392306
3-Methylpimelic acid	0.548705353683075	0.671057387279389	0.705671853826478	0.6507532207282	0.748562040870136	0.746336267038317	0.765670416037062	0.722378221905767	0.725682368173989	0.741823151276712	0.805213273122162	0.803709355707329	0.695145995761434	0.623966986673278	0.743513668828942	0.786676064128855	-0.551443397693545	0.746550525971216	0.643719739287006	0.717086306742104	0.704599476929769	0.517963237684998	0.694839681526078	0.59305528024025	0.699062613816571	0.782971874499561	0.754210571121266	0.788645272934629	0.791705435779408	0.647900924706976	0.771015360041005	0.729134700778241	0.733741317831422	0.818156637332249	0.797286852804575	0.738767390302976	0.477173495142426	0.74631161938698	0.656486877050234	0.750289475649188	0.727671127551089	0.695611712152107	0.60791122107626	0.706714006686973	0.80172619665323	0.667550457034113	0.751669717032183	0.691878511392306	1
1,2,3-Heptadecanetricarboxylic acid	0.666519282608864	0.754426613311151	0.771537309321444	0.771242916354155	0.970303082446121	0.968568968436945	0.734976150962702	0.916979279587749	0.96711229506995	0.975338652480381	0.838467568383896	0.962178420451427	0.85923188699436	0.866558240456712	0.940940824142662	0.824814900596505	-0.478592313139794	0.924583713861397	0.888491940676075	0.629608715408559	0.944887703561798	0.708333214677461	0.733263530233472	0.646653402290722	0.86843086895996	0.9885508021492	0.92401527740477	0.881268828530763	0.790685325414816	0.637548396666374	0.973775273208561	0.594830526523536	0.877643719426661	0.874102881324394	0.835655331104461	0.605332802388133	0.472445348236735	0.895828848563119	0.900587731985543	0.818880038579324	0.915389499989299	0.766794044542417	0.53158959319573	0.797790161923348	0.934339165037824	0.88436038795519	0.867475454831591	0.763840407335701	0.736653725177147
3-Hydroxybenzoate	0.486708119887063	0.741410851069971	0.652474219234897	0.694436932494867	0.655746341651608	0.653914231619046	0.602786329410262	0.683142027132026	0.688571308064169	0.687817550809825	0.779851476811388	0.621605909495859	0.767429937425869	0.669828365036432	0.667541594001923	0.764403490191847	-0.513389577811616	0.615544796317339	0.527600159347506	0.522132281774785	0.595897482570021	0.49979797993563	0.73092732227826	0.815181860074749	0.708515500571916	0.635775869579695	0.565375727327722	0.627639670098562	0.722720417621831	0.429081167917833	0.613766797329132	0.54683083949305	0.501049438777792	0.584466064296911	0.713692436624362	0.53411821781853	0.541981604113862	0.68263985133725	0.593919561316647	0.548819355835314	0.526115225248268	0.404391122533584	0.397958324053519	0.709236987372262	0.554739034817399	0.566859939203681	0.641709777896161	0.647553332734545	0.645483897721586
2,3-Dihydro-5-methyl-1H-pyrrolizine-7-carboxaldehyde	0.590050835207646	0.64095290260763	0.587426456601018	0.635573049384797	0.644774035792076	0.641121343567466	0.501239459991874	0.669267652181636	0.656465498876195	0.636165509062431	0.541769718297682	0.568924234029675	0.643191543456903	0.737430016393292	0.656048437888562	0.554411103050209	-0.487959751547151	0.635456543287252	0.668032058087273	0.543893934246575	0.532903767039727	0.673787457783138	0.613150530155515	0.608012438590223	0.582727567027695	0.556617118168601	0.493971886398921	0.498217937043926	0.366597015705581	0.585377424496775	0.50412914998937	0.590007672311727	0.442609708507434	0.567644073276495	0.594252419036348	0.70493901319345	0.399739217752845	0.641791595763923	0.571967829497953	0.611125831970771	0.543712477412893	0.45232504054179	0.278774780948575	0.585964250650115	0.466729551472146	0.68249832041972	0.552672038044662	0.681894620072402	0.474259062669964
2-Hydroxypyridine 1-oxide	0.605549733641539	0.867850045533372	0.783318967259999	0.767549818441152	0.842589894373923	0.830797976526721	0.624616165653149	0.846709054314588	0.891750648122725	0.861356333392752	0.792116729185716	0.829277696861606	0.931731311537785	0.834591953755084	0.857722618906034	0.77988320463022	-0.484759914307457	0.753980675273869	0.734419273782527	0.58572733027532	0.857753950499296	0.546408931106226	0.902710450337075	0.733471488139171	0.951736630040796	0.81470691992453	0.803910470222947	0.830116353799667	0.656722497111035	0.629699176101685	0.814040105377791	0.564369651952057	0.73910381460104	0.69202693788117	0.862142806543601	0.495485560919343	0.450655093659933	0.885136148747403	0.829284356082125	0.616325618910039	0.72690917686738	0.600297648491325	0.445195253704301	0.872799861550055	0.69924416093336	0.825969720660144	0.858341884259394	0.738295539449888	0.608313981540969
Thromboxane A2	0.667735017828056	0.779224380267385	0.821820062880853	0.749055069629587	0.9151682457617	0.910942426088037	0.724750321455913	0.874777472136074	0.912091546233114	0.914930762596078	0.756940193585289	0.958924588628482	0.80123454554423	0.790250667262709	0.872978571098879	0.739937742784453	-0.461413138820327	0.871908505069818	0.826407917630347	0.646044986520953	0.947598207678453	0.678046394197744	0.752260076320487	0.579543675071605	0.874029642229471	0.944931697850374	0.919284761065252	0.909960627682879	0.739206361923076	0.59366809174655	0.946489575268346	0.62052610570027	0.907408806129906	0.838761105588945	0.799485825576307	0.573736649843582	0.519053644689759	0.826986678162508	0.860306789386174	0.744936504694788	0.874024721319404	0.772703363976312	0.598804812657289	0.741049964216902	0.912994435794854	0.863990459035722	0.865803978053693	0.713990635891817	0.747024502517585
2-Oxopopulifolic Acid	0.671754302859919	0.723335513500456	0.717994886342298	0.721202547701118	0.866677043952118	0.869652076952014	0.704834806810592	0.849131796142693	0.864645959000068	0.87419337442268	0.75810607202843	0.875517380910989	0.79898185293496	0.777461163641159	0.855863257708831	0.742616292335544	-0.464771291011326	0.803202411922335	0.774786491980437	0.653171023568443	0.870962387722204	0.62898902454602	0.714232080377991	0.587854515199869	0.836184660569428	0.885179845748476	0.846027141429979	0.856694603606029	0.691729060840885	0.542020627726394	0.892275900286616	0.535947221398724	0.800854942529398	0.764305450261691	0.786625981557947	0.556740169311452	0.452258270781689	0.84440149846399	0.919264782693458	0.739621553688466	0.869307362299099	0.701771240984214	0.484857668482357	0.721482801940906	0.823999875082977	0.816565441086512	0.839874959259122	0.678612106911983	0.684961690250024
Lagochilin	0.704581796403059	0.731587878090189	0.738714447012304	0.741595166929183	0.943071456443092	0.942764602022349	0.720312515065682	0.919965658557803	0.945434436690604	0.954683951590143	0.814262800722856	0.947006366782991	0.851975073161794	0.877828880603761	0.9340532606914	0.80113278356222	-0.480892724128797	0.912367847860191	0.865940110442922	0.65217770448089	0.92262093526114	0.700271584171635	0.707023607880913	0.623588023072151	0.846555016797286	0.975973589322918	0.911739044779002	0.862774142169075	0.757925153733129	0.602048664906279	0.959750845267016	0.583287008128975	0.866822911811193	0.839791184763379	0.816604636245762	0.613712428259757	0.447112373276719	0.890653304000945	0.918467805338867	0.809992838049816	0.903727680726629	0.744528080688022	0.521108960865914	0.766019398448458	0.926522352168287	0.871464406811671	0.853652562772189	0.759813346206732	0.724816706079023
poricoic acid B	0.560319832368135	0.484462253109251	0.471720239612121	0.564779170300027	0.5792350181502	0.587143768589373	0.499923308069522	0.542003460667526	0.57715223286093	0.559932363417056	0.467372797070372	0.514697712028294	0.484219992216334	0.626906073500199	0.623277956864817	0.487654924762638	-0.483774776917847	0.641194381397558	0.677143960894582	0.618071172359249	0.463730359550014	0.640465061978771	0.417683973398872	0.476012977400215	0.399555804497637	0.510076423816868	0.469349349943676	0.407152716873983	0.37417577519632	0.618282566336327	0.498299506337572	0.582134711002779	0.457041816588503	0.604384782317088	0.432363784421629	0.784045005560844	0.292026874939262	0.557390550425049	0.516239806870603	0.684065820133149	0.562813100431293	0.565687530866223	0.394105838520566	0.483327703980385	0.509493171984807	0.534108722877142	0.366246136602617	0.656093639638974	0.481962955713432
Ferulic acid	0.700942930037008	0.68038491177029	0.730744470009052	0.732857471338581	0.910644690808169	0.90673382130902	0.780584864698203	0.84925173264748	0.905882745783531	0.905404762189188	0.751616073320132	0.940545361659015	0.783163331833794	0.78762396639567	0.904524584688161	0.736408710928629	-0.421609286027059	0.906052692479957	0.873664415929286	0.684840041430389	0.927074740695237	0.675107155029276	0.663560515599227	0.533429018116898	0.818845683355361	0.952442803781377	0.940978186687035	0.878976500728515	0.763144746272757	0.678033991579534	0.974193041342364	0.55766586096887	0.911247508403983	0.881528957305857	0.753780143397656	0.596661020323991	0.433392159145612	0.857727707970396	0.897747204450061	0.789693630652798	0.947801725289207	0.832028765332614	0.62857293001708	0.740892906547971	0.936069900976046	0.874707072296518	0.874186763887761	0.694162150667692	0.744708075452377
12,13-DiHODE	0.675138769093999	0.678960224148224	0.725839875334441	0.685805276437403	0.779913145513518	0.774658530034769	0.675562462666948	0.717177819265232	0.781402767177999	0.763312186003775	0.63360186342183	0.808868651864663	0.637418968565404	0.695035233400199	0.794700807966585	0.631822051113235	-0.43096356909897	0.843794759729316	0.775234196288314	0.764659285909989	0.758883295658145	0.667693245026678	0.641158559494063	0.55179379370479	0.702917818656289	0.768245286896504	0.767594950435807	0.748861562426182	0.598833924423259	0.707725548010347	0.789376191459634	0.699123702655695	0.764006381010221	0.816895017326938	0.693299003168736	0.751993327761637	0.371419447673797	0.737070768834927	0.745845524604582	0.790527035884387	0.793185175279438	0.754454831860946	0.559948633141044	0.721387059728255	0.793785959576978	0.772069212711615	0.709272126515173	0.724951543773705	0.756533488131249
Asebotoxin	0.622663512245771	0.618550485253605	0.6615278544277	0.629970881347846	0.767675848413746	0.763846885594052	0.678135836983997	0.708087814910923	0.763260459054885	0.746945933464598	0.630844006109688	0.799268158292855	0.644845644114313	0.715800498287482	0.769906492149031	0.637213149065359	-0.524259719451959	0.799057009473178	0.796556298111524	0.687786506884073	0.735839361868204	0.659990751538354	0.585875471130563	0.478196285013448	0.657606510511114	0.748847747370411	0.79499290195014	0.693858021728878	0.585156149938695	0.728706486616201	0.76197095555483	0.699653276464136	0.773691543697773	0.794621225025064	0.641207168564465	0.759654731989873	0.345844012624462	0.707432630611312	0.670360583676907	0.816337593890297	0.775392719049957	0.760982507018834	0.606828808143449	0.679676236598469	0.801557390153195	0.700889748539273	0.655038698726653	0.725817555488247	0.702877510302082
(2R,4aR,7S,8S,8aR)-8-[(Z)-5-hydroxy-3-methylpent-3-enyl]-4,4,7,8a-tetramethyl-2,3,4a,5,6,8-hexahydro-1H-naphthalene-2,7-diol	0.715015730739646	0.70609625829896	0.689587846891683	0.69560949232012	0.898311388868496	0.894899805576981	0.734132956423135	0.891535909557977	0.895433234885802	0.907106001625262	0.786379045210279	0.914539981170704	0.82518042556862	0.821744100524333	0.899265780636936	0.774174655123629	-0.47417831312434	0.851751160347901	0.803860784821553	0.6394795604958	0.902488325593535	0.618394256282455	0.699300288887115	0.573309363774965	0.835044288371565	0.939342820055023	0.905158869423774	0.877722560756859	0.737057815075959	0.563552757955384	0.946607974817565	0.521087108206261	0.872219253481553	0.787029420251039	0.802320224130701	0.561010519773803	0.441210787188074	0.872807821904653	0.929455221037588	0.74247285710906	0.886483409530501	0.748911336408168	0.559717923766416	0.73435134738798	0.893890487122564	0.857809043673873	0.87648818187873	0.702759534917516	0.719878618226764
3-(1H-Imidazol-4-ylmethyl)-6-(1H-indol-3-ylmethyl)-2,5-piperazinedione	0.665850848215022	0.582554852707879	0.650859456292662	0.647766322074239	0.797403180635677	0.79461865734256	0.716116216981727	0.748641005732991	0.761963951125363	0.767497243680577	0.599882711539479	0.776687174886707	0.641993248811892	0.700323244467905	0.780336967534563	0.597578712218373	-0.475336140963399	0.745619198344798	0.810515170112527	0.541280871656148	0.750711375995651	0.635697634935328	0.567915906301021	0.432444655295097	0.642011543448968	0.777400181635228	0.7977891362309	0.717371251460752	0.578364012774017	0.580180536369714	0.783681958966946	0.487535760977416	0.765003904379623	0.75048234103112	0.615942516884057	0.583910523895541	0.38146537695974	0.661032986594016	0.720522217899516	0.736944431881758	0.767495426271242	0.762794960938453	0.566229065487084	0.603633209454845	0.771950935636112	0.763784251151063	0.675258122441828	0.701905036646071	0.584583182991098
Metomidate	0.625234879843625	0.827581303080638	0.838902478934371	0.712941255431015	0.812905712034058	0.806967442602543	0.651537371366724	0.806894617008695	0.832185889623101	0.823503808236169	0.66258306704038	0.904078549165983	0.761309961741981	0.695340776501575	0.742050886865767	0.644231700293552	-0.464393366102918	0.753344897547868	0.687804643069184	0.640491446623382	0.919992501119302	0.625814416940539	0.790128505607127	0.557615269453194	0.88156349588414	0.839838134207228	0.807559324997754	0.923357094335742	0.662743421319312	0.523733638447294	0.833739027149527	0.696370917472168	0.789098524917448	0.741289438506052	0.7647064358005	0.506667829475451	0.6296110367674	0.758599099748206	0.76850225968665	0.644400359119268	0.808212119668236	0.649481138838416	0.506742718246139	0.663769914125658	0.804928099255392	0.796840618099847	0.89600189211627	0.642182556351266	0.699368304179476
Pipecolic acid	0.602800620744408	0.743997333271925	0.743372242873742	0.774935422147557	0.938151871143762	0.935377140956052	0.748327404950827	0.883098307892953	0.941927636778968	0.946061986471688	0.885174302793862	0.920422787965374	0.86603054949825	0.833319263442357	0.924711133295722	0.87139925313844	-0.473821086859457	0.887417023357485	0.825586134105828	0.610366586431467	0.901201553013794	0.626480554882001	0.75227886310857	0.688478942745411	0.872925244890562	0.955629248582739	0.892252617076333	0.864920096508613	0.838107173543253	0.626151612657194	0.951482306299771	0.580518318876632	0.831692644026711	0.877641469339528	0.861045845174377	0.59538630085095	0.440342026195598	0.897122825380423	0.876999809596413	0.808384012685882	0.883215723603364	0.702253384849914	0.50382835813562	0.852381467343508	0.900885778663932	0.840966662561297	0.873610332165232	0.775569871809783	0.77604097181832
(S)-10,16-Dihydroxyhexadecanoic acid	0.704996139239614	0.645661815115559	0.598842890106483	0.69132838713219	0.814938161257437	0.806643284674935	0.695248677805805	0.823766105692328	0.834149445403675	0.819459764846515	0.734167144667283	0.807087061916531	0.812955552888097	0.82960295052394	0.872262651589028	0.725635152355977	-0.449340580854766	0.801752016078481	0.773750705250261	0.683012777259759	0.792038817037975	0.587252370091698	0.691244402171472	0.582364111668181	0.78005021770496	0.828699649927691	0.819299440823614	0.783344431048768	0.632141372495606	0.618307485700509	0.840306499681969	0.525218632700511	0.763540435519124	0.733525639391312	0.738047760321934	0.620312476496741	0.325281380453984	0.917564403757644	0.923904723057723	0.706372288118967	0.840036164049929	0.693210934076182	0.482975557218835	0.743726821207477	0.757227611350942	0.815444516144469	0.836472297659604	0.668728826694672	0.677994789261058
Nonactinic Acid	0.650691992706641	0.679799290093966	0.734510884499114	0.726214213215109	0.912181232242122	0.905727362299995	0.792813806721858	0.836173648512811	0.899985685829917	0.898964594027622	0.776044464621294	0.934147100676668	0.783712188885381	0.750920740880829	0.900639743970201	0.758053810547365	-0.445504703170186	0.884455387585645	0.855372149619424	0.669721984990777	0.924206335991996	0.624136197668483	0.675929050030039	0.527258244660886	0.826592236541466	0.942853383442478	0.964689494477753	0.876754438251074	0.797033111548589	0.689539155665617	0.981706735741982	0.539485971793937	0.940623779541698	0.896810292514906	0.769053764123945	0.574647211174361	0.412815457480838	0.828410046614274	0.86166365340121	0.779071491746599	0.924888341767878	0.851449291837978	0.689100213201513	0.777186035384541	0.945443029780462	0.849102696983869	0.862403386301977	0.703740622093969	0.771350622801003
(E)-1-[2-(Hydroxymethyl)pyrrolidin-1-yl]-2-methyldec-8-ene-1,3-dione	0.617787865111084	0.713457904194243	0.749593077547792	0.764752432279049	0.944118228913368	0.939018618451523	0.773109959077065	0.858610047336741	0.937142978894078	0.936875606125407	0.814538427007054	0.94091132954391	0.81547991144691	0.791930220401914	0.917719112289358	0.798644433371873	-0.449620601616672	0.900040329440788	0.874360606919283	0.616743270528681	0.93900303617852	0.656272415664368	0.697872446626423	0.587968699544343	0.849527101970459	0.961672800081088	0.942420437572541	0.871250352425362	0.808332595648637	0.683210079535539	0.980328627899172	0.554671534329053	0.904006239661054	0.903002043010402	0.806689963224122	0.587801177880561	0.434464386450039	0.865601925345862	0.873780470361958	0.793530501979978	0.931190241557613	0.801414416240123	0.601483935726115	0.804622415164332	0.936050697563378	0.860914931788037	0.865121184695548	0.731453540005955	0.747259805283181
Colforsin	0.572897592552441	0.613984922732719	0.613612274629032	0.624701372419634	0.701091964500332	0.70318303002543	0.665773892921897	0.667033193557683	0.715598776997764	0.694935422254089	0.668678280701841	0.741815312095299	0.636118528831239	0.632035128625786	0.715324298030338	0.657066793925668	-0.513717141048254	0.761048372473393	0.693653184270613	0.599792326829773	0.719338292555325	0.547682617123659	0.577706131683152	0.540732467144257	0.628379052730342	0.715901447180701	0.712907488858442	0.691416064559306	0.681996115243699	0.706145633502638	0.740026389474593	0.676599726642259	0.679747085677336	0.781836590558833	0.620517035094369	0.657976105253889	0.393222524033251	0.700178439044127	0.659187165172593	0.778310724976234	0.749551146459907	0.676877110817415	0.561077197029098	0.683652757228949	0.766119430600395	0.578731263105554	0.667440342667688	0.626890388645988	0.716526943129166
Prostaglandin A1	0.710317716244848	0.695266782110934	0.698808678267296	0.65683174303634	0.78050535948104	0.772993294737259	0.661618197031909	0.770827102712728	0.776590863236622	0.771840196976456	0.630560129912609	0.849699324434643	0.686242268114892	0.664936317745724	0.731551483292079	0.612924725048685	-0.443041963146387	0.738856267491332	0.693009502760566	0.600399259075339	0.843410523840729	0.613209195049273	0.65437980923125	0.475794555160592	0.761654530328993	0.819108761184639	0.82734184868179	0.828007774091085	0.633869589548311	0.471883341509395	0.834633119863968	0.527238229892403	0.848291141737241	0.70722949487273	0.675241401183898	0.466867413849638	0.541514398417892	0.712288240565244	0.798097470672052	0.621161620819987	0.785696816293192	0.711378895086952	0.622531754466858	0.600861494116528	0.824175840106362	0.751081456029562	0.814689865613873	0.561131146508497	0.645747774165784
Pinthunamide	0.723249317528978	0.63872318568618	0.647134492609911	0.657632334395788	0.729609943124473	0.723826231110971	0.624455325535897	0.704046450656713	0.744729529092812	0.73314707896555	0.575626997650889	0.784810477469594	0.68619215642128	0.665521110577748	0.742743445721719	0.556264848561255	-0.376502615011669	0.721371386071437	0.681876180512015	0.523771969438925	0.795327890019365	0.75443570612501	0.656444757536335	0.519135020067232	0.762768328123659	0.766100852183947	0.785988057277102	0.752557600748558	0.608094850706319	0.485146984667191	0.77031218382662	0.473204772709332	0.761147647397764	0.6861958383306	0.636506715528273	0.414808055379595	0.599536912201955	0.670540173852171	0.717280120908463	0.695802242799434	0.74456243802724	0.710831120873279	0.598648475405052	0.693378155478748	0.78494953039177	0.737654025431296	0.73176839562636	0.613847100532343	0.586851825129759
Methyltestosterone	0.629049050033786	0.678468874145368	0.70954631169419	0.733560648159386	0.871352129547988	0.876153447072347	0.699144103888047	0.812070906353041	0.869601894186175	0.874240661432641	0.740522414907224	0.89131863165138	0.765853829728126	0.763819265240872	0.833353899162111	0.720734461448716	-0.448341182727902	0.819229625854469	0.77419107765921	0.58230909443398	0.904018829851275	0.685621858835754	0.656596286404102	0.543283579671441	0.80612783728922	0.91105936479367	0.856826830188539	0.851942835767594	0.743801777949925	0.581378206515226	0.91886476221462	0.513181508990645	0.831462130584066	0.806655118439462	0.740922376032504	0.511087856504784	0.514195619388535	0.811532479486647	0.87578316291057	0.697815998966029	0.87315035976092	0.708557024846326	0.537243722247132	0.706031659922225	0.853190036781681	0.814811620396197	0.820064210878852	0.644975343042618	0.680108528364052
Enrofloxacin	0.692656452623965	0.66121008259668	0.628148619369767	0.663486449682983	0.817502016785747	0.809746690782029	0.724924496316342	0.844801443331619	0.832175151000018	0.828584438454358	0.764903525087874	0.820410506557772	0.839133109363156	0.799751221944881	0.87071114811046	0.748593866315572	-0.460746918704703	0.784449532435969	0.769574893912596	0.639881423233485	0.815991373912527	0.529065873861946	0.687041434047949	0.563621726477455	0.807049022012467	0.852396014233103	0.868021987503949	0.784883921429522	0.684596668289472	0.620705478336742	0.871808043882744	0.426231092149728	0.814883017718238	0.714537423972076	0.757107263562755	0.521541653976584	0.339922278898778	0.859530764224785	0.901937864255211	0.663070202949294	0.799413570185769	0.713029863607886	0.576720689681238	0.738240987812483	0.781668752174138	0.801043878458393	0.802901025271517	0.657497846006348	0.658778333750159
Sulfooxyjasmonate	0.405653196089048	0.503893183891662	0.534067700813073	0.548485683935377	0.563713069095084	0.578294655203694	0.445721674110543	0.497073270647936	0.554385959281364	0.542001000424775	0.493256033206756	0.462410789594635	0.410577278923297	0.555183041055575	0.508918764030948	0.497355033159478	-0.508803251482781	0.614682965193292	0.607699797108335	0.470675940283947	0.442836646321236	0.598458171090442	0.374241011632149	0.555634326883814	0.339286134508382	0.47462964281544	0.338736092319827	0.362356366124942	0.440752696189402	0.58670541662865	0.426179986327545	0.654613715272892	0.315150462606244	0.594305102085216	0.407109266478076	0.679339900864689	0.359764864512157	0.442202080419842	0.392200800995526	0.68003368182491	0.51027622223836	0.385308263493773	0.219182498195083	0.452319914978644	0.459643278663823	0.40517517566954	0.345342221899666	0.542353741851587	0.405987801999532
N-(6-Methoxyquinolin-8-Yl)Alanine	0.526019461121878	0.717332011808221	0.726869657113455	0.718603115669023	0.718197433403406	0.717054371799959	0.609761718119538	0.695602394559719	0.752105933516871	0.726645529290426	0.75535004990625	0.72023362421692	0.751304621926195	0.69808118932988	0.762564874064883	0.75420339724229	-0.503120306897505	0.777744516266528	0.659253893312206	0.64365903954191	0.675043493795199	0.507778934431608	0.787702155509517	0.750197857512329	0.778222899482852	0.696114622121038	0.676853742136324	0.747319073321533	0.681893679563471	0.639738838772626	0.692616722329235	0.688383070248915	0.631175465326205	0.748772233532899	0.741608043460125	0.622929689286349	0.360836761670485	0.737206121428547	0.662633779559659	0.739740183929795	0.646006262029187	0.567532321150079	0.419799840168098	0.893255088791257	0.658338730226433	0.707004458084229	0.72076638832745	0.737626656551234	0.738088443368672
1,2-Dihydronaphthalene	0.690144350297661	0.703268647426936	0.724628845377447	0.688185996697973	0.826999519228784	0.816280842432609	0.69711038222316	0.796733383865808	0.838082961137365	0.822459973396285	0.685847943782727	0.865507116262054	0.766271167655771	0.72994845016889	0.827872236132073	0.662272014816337	-0.423283947005099	0.780213181813194	0.772327528808659	0.683126621510931	0.881294648753394	0.576246270991422	0.692726752844022	0.52758053977933	0.820822549276431	0.8538842664719	0.896868171082706	0.832810351968437	0.692017920800078	0.591932378187402	0.891194788840842	0.481536012890942	0.890659293369837	0.740315737253577	0.710325484963924	0.501439433334562	0.458326789059807	0.790291642772931	0.847264155521446	0.635009634431976	0.832506589352485	0.769787530643886	0.657071250408108	0.704976173185133	0.839648999517409	0.807767689912169	0.818227076428366	0.626880348136822	0.645161242276125
Threonic acid	0.662167513411979	0.591147864609659	0.676683794900598	0.605175574928261	0.729597555448301	0.715360921305089	0.687844627254855	0.655068838624206	0.7132300419725	0.705430554784725	0.547085206955013	0.801042388807573	0.60881651951813	0.574065325046322	0.729424969601922	0.532223615021926	-0.456379835432661	0.713101412949904	0.751506705429384	0.632462599060847	0.785630684647884	0.600626088101755	0.592105486629884	0.351349926396715	0.706069486383284	0.742308914087782	0.870913939678664	0.773941098219059	0.606922812098357	0.624059265859295	0.811301893973813	0.456439563762665	0.909280365477225	0.709226236100777	0.583696742537694	0.462064028923188	0.436069304937121	0.610207310009193	0.689311894482969	0.609915132546648	0.763507550256835	0.854228720717121	0.818891976503292	0.607396213788622	0.82030808917919	0.744994430997368	0.688092457444048	0.544824242843787	0.615152564226387
10,11-dihydro-20-dihydroxy-LTB4	0.639843348052967	0.720945054534068	0.747433331987195	0.741731757305434	0.937730812283277	0.936070756039563	0.730890303853302	0.881391562804448	0.936122350119867	0.945689878012011	0.801830699163594	0.954011450968344	0.828190281387198	0.811814678433409	0.910239885104782	0.78523128120836	-0.442538810694021	0.902560434283863	0.854982353742531	0.604183281142021	0.943064730848974	0.674159667754461	0.702975918010286	0.594112141244879	0.853874684076597	0.977579887816208	0.927131691364382	0.890728475998569	0.793244540335159	0.601198215691378	0.971077768959431	0.55834822596858	0.887305974296506	0.860360952935425	0.803899242931852	0.556078535875002	0.467509552010296	0.86822100852956	0.881982549570509	0.786737092048082	0.914248837648819	0.776095306597786	0.55423182871085	0.768323091762977	0.939702615316577	0.862075841495497	0.868507889470843	0.713374584502029	0.73509725379903
Neotrehalose	0.730007500767448	0.478300031505599	0.47630544489109	0.490092036507531	0.567739130708608	0.574908184180534	0.431415411763029	0.565107713509986	0.544103356929214	0.549592068993336	0.399748253271879	0.583262849191623	0.454841192135416	0.540536492508996	0.556110219892694	0.393757023046342	-0.431788885833568	0.553180050544193	0.584034651695374	0.468253615192379	0.518893738720283	0.735787856716429	0.478849504691498	0.303693325566641	0.474557425959575	0.560054212431358	0.545627563897188	0.535289306569447	0.335839657310809	0.446759364296674	0.530720044038328	0.512388522497495	0.523499924857223	0.504094831447955	0.473027050571146	0.485202864976222	0.433150777935152	0.481739578545988	0.534125971481339	0.682617209640899	0.551137720029299	0.565195856249802	0.471037246710923	0.424883908350299	0.621702342500935	0.551040145523657	0.450992896692863	0.564378214421117	0.463361546767842
(3E,5Z)-1,3,5-Heptatriene	0.642650511032657	0.641767197646527	0.546410706001592	0.630385495309938	0.781852552013873	0.778840251363194	0.590391298272162	0.789559188766871	0.785317484405154	0.790359035767644	0.746032754191956	0.750154694712317	0.784321422105532	0.749630945601795	0.80023507919867	0.754475737460833	-0.468637043385563	0.705290413261618	0.674105839977743	0.570025265727313	0.732630733169691	0.538630091394373	0.675797334686008	0.535919608392385	0.752025408003788	0.781467680465272	0.741196447776236	0.731108921903743	0.61199214341107	0.531401527586166	0.779169558372662	0.465679920624031	0.684421705886681	0.647300974416628	0.751987954498226	0.511031811225728	0.330508040651112	0.832924503957662	0.854007423575832	0.617597251672127	0.717635107453057	0.593769750379199	0.424744573004551	0.690136287314424	0.69463329977886	0.734732242213092	0.72832059129751	0.659982320758915	0.619140260150181
7-Hydroxy-4-[(3Z)-5-hydroxy-3-methyl-3-penten-1-yl]-4a,8,8-trimethyl-3-methylenedecahydro-2-naphthalenyl β-D-mannopyranoside	0.631813727010792	0.516135049118136	0.583231383181127	0.544209976594046	0.634384049172528	0.626727740002363	0.589960300258695	0.579006011163169	0.631214427011533	0.609229249706637	0.478369942912738	0.686926990327302	0.540515200291455	0.558635331921397	0.671594335103783	0.475449748247126	-0.459016486415189	0.69481354202697	0.684463362414978	0.817987680433427	0.642971400441758	0.552451909282303	0.500661711893526	0.332137309709576	0.553593167375467	0.634282296810947	0.749756176441869	0.603692410012605	0.507417671634367	0.646427565225553	0.673303005352719	0.577794030524678	0.756285773690268	0.67670420700669	0.502059079140195	0.635773004691121	0.280187129102845	0.566671014578994	0.560366456027914	0.688058413699849	0.679916665713844	0.75787098911021	0.731496552907322	0.562157558163857	0.743196949067902	0.583408133155105	0.532740162651757	0.635635664743448	0.629937307765817
Convolidine	0.641606336468723	0.664745080382333	0.708767383324582	0.723554482007891	0.90748191754714	0.902351916371587	0.797725236846413	0.846991714522304	0.900584058240509	0.902004780859665	0.764122193859588	0.91878832043991	0.795107404774641	0.776729807025777	0.898646200906521	0.74267303536128	-0.432610190492075	0.873620538837497	0.854923650061943	0.625951201801573	0.912185821290302	0.63535441907366	0.654218632988546	0.554979555211662	0.821444720715265	0.943339611538254	0.936324991229703	0.866798700288309	0.782008525615712	0.617987323511682	0.967983633348053	0.5002294317165	0.89178361106551	0.879334017366833	0.749195271228506	0.566381626186281	0.419512579071233	0.848872064467549	0.89564225277282	0.781605631710666	0.942118979177539	0.820578425577293	0.60415434097767	0.758639739683244	0.920475015547793	0.86512465291121	0.877366886744673	0.672792890235897	0.728478963244359
N6-Isopentenyladenosine	0.545723755191712	0.511320962860985	0.573386404758087	0.62781845533778	0.701171283303715	0.711053117206629	0.50573426474093	0.641770180656957	0.688320521267403	0.679010820634579	0.593257872975726	0.639107769412418	0.547195948968528	0.685327535827026	0.701889074795471	0.605731476245614	-0.472397495811567	0.789162778177492	0.759478229558086	0.603210878732535	0.585198618702942	0.636816140299808	0.508948473355231	0.520620123514455	0.506494949254138	0.645620623480571	0.575918906336024	0.594883055067242	0.479715852920369	0.706025474950105	0.624806516291648	0.677970512141856	0.540445074725922	0.727803866660744	0.545802287620975	0.765746382163471	0.233241131570141	0.684700673705597	0.612403726659955	0.796763021340806	0.712817940530779	0.592705475695746	0.328463111377258	0.597885693545238	0.617000633166287	0.620878209019216	0.555774770643245	0.645102135546307	0.598512556434595
N-((octahydro-1H-quinolizin-1-yl)methyl)-2,4,5,6-tetrahydrocyclopenta[c]pyrazole-3-carboxamide	0.594552685746995	0.734994529813077	0.639550288270139	0.607298163451977	0.639992107906299	0.629829721476102	0.432545526252507	0.709061206964256	0.685554420659019	0.662218495311107	0.626265104872051	0.652717462334135	0.760246728003436	0.744151612354474	0.698585580136382	0.655878179032173	-0.50346235014355	0.619108616407649	0.563338533169585	0.741055516566753	0.612663319851327	0.529714541716296	0.793194650590235	0.604391749690722	0.730581238862805	0.598919700655801	0.571086624182895	0.597186612969026	0.402559256410981	0.541352941628256	0.569876921558209	0.677402991603439	0.538178295937433	0.537782813239157	0.752940742602153	0.694881320770142	0.347028232064385	0.791203419640866	0.657484652544203	0.537376886453611	0.545308513474836	0.433413306623512	0.317602361794166	0.674883331833077	0.514175659259258	0.672799699030254	0.651297220085485	0.751225543793354	0.638495655495381
Diosgenin	0.648584459116183	0.646534366129818	0.640892531445347	0.69652122437622	0.885672389241477	0.884451369802127	0.727792394595668	0.873526239201094	0.872470316022966	0.888505228579157	0.748832104724642	0.870796760484618	0.778310705690918	0.789798729494805	0.860099450110206	0.738372205780598	-0.436649396239191	0.850671148147765	0.828533788317299	0.590165395681408	0.859387365582699	0.630868527629557	0.613222354330403	0.544469785093439	0.758752516196341	0.907591155183413	0.855134667138461	0.830978873642296	0.701948330484143	0.532899736129866	0.908594540415147	0.49348968487387	0.809523726371601	0.814137309241659	0.740529930172355	0.579384878119313	0.394388543636721	0.848462543515312	0.902373613698786	0.786527154819853	0.925084557896832	0.73465294624178	0.481279690837823	0.671768640540757	0.87706415406462	0.819578962468525	0.864072812614433	0.660457087727471	0.669730572383112
PC(O-18:1/18:0)	-0.48765112919858	-0.446399258189389	-0.369251725162055	-0.303439495566607	-0.408335492571676	-0.408365230206553	-0.410974402285133	-0.441947665591856	-0.404682198059463	-0.399569840738174	-0.385867572229005	-0.336823297127936	-0.415150362757019	-0.469758531156098	-0.373979905199763	-0.375237885910382	0.675606707053166	-0.311727183109148	-0.400031697312967	-0.369602004955384	-0.370440147437362	-0.389281973737225	-0.320578217951501	-0.357626395041122	-0.306152236409829	-0.338395514530051	-0.295414437539008	-0.296104505474871	-0.317872729602042	-0.420842989722375	-0.340420819584737	-0.304124355659305	-0.292990464778829	-0.30044925786608	-0.338430847823203	-0.351370425106995	-0.392719708911296	-0.316924560975102	-0.405192303839467	-0.283271956249671	-0.353114228653936	-0.271850436963694	-0.339350332022633	-0.208997428536593	-0.283440413259653	-0.308288626726923	-0.312818712046355	-0.310326920564741	-0.176855669885837
Threonylphenylalanine	0.472795984538616	0.790008238001477	0.657651261882117	0.609615551240074	0.555790897885255	0.552960460399238	0.322862732385422	0.606126723217273	0.605478858529481	0.574539402594857	0.500082279148997	0.518163081347832	0.651399286445498	0.657394534238191	0.53367290075214	0.516103460207933	-0.447957124283285	0.495665998496761	0.486071232125785	0.473084065929859	0.523762253466741	0.550086564488686	0.77168203760429	0.667324512382105	0.677329685646519	0.451942219967229	0.373662410349096	0.5414005752387	0.282278294042978	0.438938262060515	0.383450698120367	0.659176698924135	0.315757920633313	0.372385523155751	0.613323866429814	0.489606725211649	0.478216281570241	0.572065337962661	0.481003785507015	0.442621151997383	0.369332955068826	0.27907627469266	0.114948934389295	0.590322292676277	0.309634400381086	0.574093146395079	0.514411375393146	0.6300231926358	0.351377273943327
4-Quinolinecarboxylic acid, 3-hydroxy-2-methyl-	0.574948398358873	0.588335143831016	0.617518208811261	0.618252167213151	0.788946083321348	0.791851336132375	0.601201416637399	0.71214887759003	0.777324297305488	0.759746076718215	0.626309526821811	0.740239153805226	0.617353235654867	0.701127397441279	0.729585704209636	0.632602534191627	-0.434149962842709	0.773139352398194	0.770294695300295	0.545432764821584	0.747281613654939	0.697698669918796	0.527368508533447	0.488802916542439	0.605066341240036	0.760269603771063	0.635155105858623	0.671709061417103	0.580114077407452	0.708860607631744	0.73192735702234	0.628032825532584	0.581580377413723	0.806445734156233	0.609177324974529	0.674264219244916	0.43532872594618	0.728203940590065	0.689845972996549	0.721494614388604	0.793754016437822	0.603765240020761	0.327014523459251	0.588482511128076	0.674679729115913	0.715328368976133	0.6838191520871	0.614911629725729	0.599189006123336
4,5-Dicaffeoylquinic acid	0.616079546414859	0.673920307651203	0.721204059212212	0.714278558693683	0.881788653409469	0.880280763641133	0.728294122763475	0.807945278522615	0.880513170403019	0.879638976448041	0.737963758894839	0.914986088701363	0.779103970119926	0.781607833884787	0.881497145883166	0.718053306894194	-0.400570181084268	0.873631996745516	0.838027779647918	0.637980474018242	0.883246572467641	0.705325924855314	0.700949546002963	0.561162787926429	0.801259378262538	0.917107381626924	0.888529952666432	0.834299829696088	0.735511719966805	0.670795050404412	0.903310289030016	0.600532036626935	0.840773404212511	0.866383764181943	0.750914714588334	0.592158902940743	0.425206589126971	0.855228233058446	0.820383424879086	0.792369212039879	0.877663114413701	0.814116560639454	0.544131433005297	0.766828296951687	0.885904298664773	0.835393292016242	0.838673247454584	0.668913372398414	0.767615621198476
4-[3-methyl-5-(5,6,7-trihydroxy-1,2,4a,5-tetramethyl-3,4,6,7,8,8a-hexahydro-2H-naphthalen-1-yl)pentoxy]-4-oxobutanoic acid	0.650850155658714	0.601458615643785	0.658271562682304	0.685366557572858	0.805451738758092	0.797457206484099	0.741260229959304	0.758217740957554	0.798288391381248	0.782022599465161	0.725952301457142	0.814482922329416	0.709956703450611	0.719305624083217	0.801631885115991	0.708918388149233	-0.475463460925903	0.793712625726784	0.781848283055352	0.589912641116104	0.800456531618642	0.577751474100029	0.565226040087035	0.550274241455562	0.685975272544664	0.825967422449272	0.833422136370193	0.710503170145117	0.749894347543815	0.688745088560462	0.850645277230321	0.514328496261696	0.806800437677752	0.835276209085706	0.669798852377489	0.673657306828755	0.429351872846107	0.747163020684303	0.732217547631571	0.695127144162808	0.791563331387607	0.733621548569938	0.630567157721689	0.716436627058343	0.821571320824659	0.730178898582331	0.743536301394715	0.657094714563584	0.709305048431543
3-Methoxysalicyl alcohol	0.554200745766446	0.62982897777307	0.555523652120599	0.64524788584662	0.687315881778363	0.68371124173686	0.551359283110158	0.710887590800344	0.717866494966916	0.693693063958835	0.66411128507798	0.607973711456176	0.753984153901075	0.767177359951789	0.747638145477552	0.661888442850524	-0.470909303952628	0.659315555474149	0.69501626798887	0.542089092025531	0.61486533605966	0.523035160865871	0.651765125732256	0.609997265190886	0.683589725051743	0.635952168086554	0.623980002495386	0.547562626947075	0.495667488041972	0.629939948025856	0.632186049834577	0.424476227433966	0.543995567418295	0.582410792708102	0.64598549139551	0.549601593579143	0.260463252888071	0.76131211886411	0.750461004822407	0.599296983832976	0.607626463236188	0.544133748728567	0.348454745514911	0.687765397856354	0.528606074242122	0.68519707161684	0.579176727509472	0.657467197375856	0.464954458556272
2-Ethylsuberic acid	0.571288889982739	0.578788776407068	0.53302250905684	0.567013412253465	0.618511669265387	0.605567743452112	0.599788161543972	0.652059960264096	0.625766525220768	0.612318066908384	0.589743689515489	0.584969474884788	0.701107562306889	0.707119632885561	0.742295982061119	0.571489786218765	-0.431944355254374	0.606694518079369	0.657869329087373	0.660534168139741	0.544148870386703	0.430266044726939	0.647171084494582	0.567140709293968	0.640840244194576	0.578592666104805	0.668825907783324	0.526435960860269	0.452787173167149	0.605964132719482	0.616992386011646	0.379126132874564	0.643285570213152	0.554871987419732	0.597708688343991	0.545317315249524	0.184012366063387	0.676806677863121	0.690791085099898	0.563626768298003	0.548851089370499	0.653840242450638	0.568705420074587	0.686645187449956	0.551255457054447	0.695392228717541	0.540271544376577	0.60853586538581	0.545728942077857
2-[5-[2-[2-[5-(2-Hydroxypropyl)oxolan-2-yl]propanoyloxy]propyl]oxolan-2-yl]propanoic acid	0.681857937126561	0.56529681407361	0.622832553371161	0.604678147276828	0.709374995483588	0.694031055184341	0.746800214062666	0.694464798364962	0.701514729209262	0.689536036913184	0.597748334127599	0.78453711922986	0.677936460049757	0.639347138958531	0.772252157821606	0.579248296008949	-0.424114115592448	0.729669435056715	0.724143029566016	0.719397232550554	0.756547827434501	0.43576790018218	0.606278839754218	0.374473733987823	0.700665922947639	0.744923017674642	0.921663545045649	0.744106816083052	0.612052000755275	0.659744130500272	0.819826032397344	0.42730990139044	0.932554333859951	0.690662422882373	0.601898264572567	0.490327628924719	0.27564762231146	0.681285418695694	0.744586544939851	0.602233351973128	0.737744181917147	0.866432284051773	0.84841125069755	0.656959259216985	0.795596399130238	0.733193312277392	0.721071429773224	0.590820127502921	0.666813608455747
Tetrahydropyridine	0.563686765812366	0.740125419773129	0.723211765428885	0.748293693961147	0.907619684678541	0.904845873702533	0.717671507234488	0.862871935760858	0.916740710752902	0.91792881205688	0.885938008369623	0.887874499618798	0.85695027726872	0.815351501142916	0.898397097467501	0.875130560693321	-0.475734273043618	0.857180156812602	0.780988833860031	0.599760889116651	0.85731154721054	0.586546407077651	0.758822782327328	0.694596310328693	0.858670145630737	0.922146851474732	0.849043547700145	0.839096813799643	0.820819000909106	0.604458327119348	0.911152571750524	0.602981839853956	0.781225398666405	0.861202945138575	0.867615944307311	0.598837486909948	0.407923413014893	0.878288284160019	0.835877974677856	0.808847669304358	0.838728175050227	0.642150296860272	0.455140093971588	0.855367438653322	0.872207746701017	0.803200538941495	0.855176814593327	0.791531613819419	0.785333924542751
2-Butene-1,4-diol, 2-[2-[(1S,8aR)-1,4,4a,5,6,7,8,8a-octahydro-2-(hydroxymethyl)-5,5,8a-trimethyl-1-naphthalenyl]ethyl]-, (2Z)-	0.69039908872105	0.687253317485786	0.711765477022507	0.686929460220981	0.874488091548191	0.874693818741411	0.706093591029178	0.862872833542703	0.872707676553491	0.887733005780814	0.715748634035199	0.919509773772584	0.77909477038391	0.787441336993707	0.850945172445423	0.697459139818719	-0.426712485156733	0.838297508908592	0.788287148928965	0.61195771579542	0.90875677027623	0.660399588455378	0.655993617253788	0.536374330172406	0.814929535947304	0.933639535461837	0.883768939683175	0.881705116767333	0.713816544178385	0.47510303951158	0.927172909755215	0.518690095169969	0.858285765648083	0.774810660774315	0.739593098257011	0.526817511713827	0.493552587836864	0.82064879062526	0.903232075571348	0.725867124495136	0.884620004857426	0.73914492844195	0.529540058540599	0.66160705497646	0.893380098573352	0.836437379812469	0.850920183458201	0.640313589005684	0.689104626723903
Tramadol N-Oxide	0.608551660200815	0.709578356964418	0.770977816061562	0.718185679419091	0.887716974331722	0.882641164071928	0.750627918561105	0.814618141110126	0.884171157646311	0.884407953851336	0.729241975670518	0.938838896027346	0.76405716373097	0.716677374003444	0.846252567545722	0.708365903215754	-0.424168129824086	0.843384989289352	0.807269433649554	0.631678138954743	0.942260206415679	0.629035154388997	0.684848560624347	0.517871294834057	0.843835479896629	0.927559341073372	0.932947264704116	0.903571054668655	0.774327064824863	0.600051079097404	0.954592712957715	0.556191844078676	0.914759800184495	0.854119552190021	0.748592138652513	0.522290836408652	0.487566318795048	0.794088935018389	0.830408527055616	0.721569481310656	0.905758207557379	0.80189982266427	0.636742096566575	0.726297138683926	0.921196629564668	0.826812052056981	0.869617195208813	0.652184879176653	0.733551832317139
Isonerylgeraniol-18-oic acid	0.65997606212145	0.665796392944373	0.656806994605586	0.69089315935584	0.884068761913356	0.886407724254066	0.705936759926934	0.856440249821735	0.886087737700585	0.893343778382383	0.764653275318321	0.886053116563078	0.790655273834389	0.787030139206851	0.865185252506596	0.749921484944265	-0.454985327767627	0.841818608593243	0.792045040550152	0.599582159735791	0.895148107017239	0.633915401587362	0.638003631256659	0.552707149647411	0.796621577080222	0.925639487184447	0.849923635865615	0.854449670505535	0.729033612274379	0.559118835008438	0.926867246779921	0.511020625311341	0.800573405815393	0.803258862255559	0.757628377022715	0.550621378527003	0.431128640891861	0.871958094467531	0.937687572964473	0.746456932118546	0.913076769694778	0.702983434449887	0.452709023310104	0.698497256130146	0.862846330159044	0.820165335983499	0.861334322461071	0.650752176817027	0.675732158693585
2-Phenylpyridine	0.542189688601316	0.708897775696571	0.716929153957225	0.697797446596663	0.704814843476005	0.702589521085942	0.597308094302106	0.69407855198366	0.737463863620413	0.714907303164406	0.739004825161721	0.708396919166918	0.746472452189542	0.686790161420963	0.748018432191884	0.734903123355578	-0.515097573216196	0.750545090232852	0.633517378971212	0.606859428204539	0.668388254194392	0.468193118078084	0.774102862767519	0.727569799083243	0.767559080101179	0.683753158901955	0.676585066016471	0.742158908199613	0.659857420118332	0.605079226167583	0.682867007906731	0.657497602854733	0.622643297775771	0.724581079644597	0.729936588214702	0.583169074043222	0.326359505138722	0.717206892842117	0.647307377805298	0.716633250765393	0.627942808000301	0.558029042961726	0.428437321106685	0.86707246306212	0.654722627578301	0.687065430845095	0.713100312308446	0.712136522365644	0.704463224421378
11-Dehydro-2,3-dinor-txb2	0.579189831108648	0.683400260834481	0.678117492521045	0.587067120902531	0.72383940311533	0.723649245913227	0.578612017742556	0.676992628364809	0.73275988834179	0.713130569085548	0.584704218039855	0.792484380298428	0.614891021694741	0.661321604006798	0.702653690838205	0.599060032657762	-0.507061800986437	0.788743731025256	0.709390532050678	0.657778483200518	0.719625577642293	0.616682262830117	0.65031611987699	0.456586762966124	0.658567146530311	0.726707037817682	0.700884341793928	0.721437700399425	0.51846161660822	0.695991538287131	0.692594238986095	0.838011661529948	0.687706834115287	0.758642719589537	0.660785708392141	0.714980435085162	0.349066642059838	0.689831461644044	0.632427988789582	0.810454799344236	0.718427222685214	0.675447373230465	0.474254318066547	0.625425660969827	0.777010517706849	0.66868126208731	0.655635226546718	0.702486719340858	0.722967068988405
Colnelenic acid	0.450046363100689	0.442828783577616	0.479514007742806	0.492548974679291	0.371213428818491	0.368154046381849	0.498369977033384	0.347338404760764	0.373954964841881	0.350886400921547	0.380785330662043	0.374231074987585	0.360483743422562	0.362598522982938	0.405939936707951	0.380687681938556	-0.470797437752867	0.429672850735349	0.402966220433963	0.657833457734606	0.33784852075701	0.371228301949534	0.390737033139628	0.467857803108478	0.351589056933397	0.323072983300658	0.343383546233878	0.284467808136388	0.401994588377915	0.479796905645862	0.338238359144277	0.50698446093319	0.351769966312469	0.440076267473734	0.344824695226068	0.534222889369344	0.354101744248025	0.351224997740416	0.362970401005119	0.446099212490975	0.350248135384202	0.400209711176595	0.444809751753154	0.426180461792025	0.349731813839335	0.359079825814505	0.314743171857599	0.413559239825682	0.455868057597465
Brassinolide	0.557869408057884	0.473631436109434	0.492615487480609	0.55719721983774	0.664072444552796	0.676313447973125	0.502420869616213	0.611655565653667	0.655369077213003	0.642354548189405	0.542656678798354	0.597644504337366	0.494805050005403	0.659585202143922	0.666343478264926	0.56931045022448	-0.498626607602901	0.744910770867141	0.736719542686919	0.629297494634923	0.538270312542571	0.64814881508394	0.396783306847426	0.463824908217948	0.420339175249697	0.61209606134787	0.517602818193917	0.490321186009256	0.44362237712994	0.674203833479061	0.584921613063214	0.67882738659659	0.491316961941583	0.708210803233307	0.496069984273725	0.846019253481108	0.234441429378554	0.646249279329898	0.597868009959395	0.815752561426562	0.699124908714639	0.561583898165459	0.30233208135996	0.518070599931233	0.628636382795571	0.558292236065223	0.472752718412368	0.659207137595381	0.563366972919283
2,3-Dinor-TXB2	0.59066910172349	0.625871470285911	0.658146698357996	0.636434646784065	0.751899207834781	0.745100490242336	0.641904403798699	0.682137486114017	0.746644146309254	0.738825277456724	0.642345203572886	0.806867685231399	0.633564447826385	0.662676780164343	0.732125168831674	0.654273192783504	-0.469601620779568	0.780180097931593	0.699241055441478	0.687560349694428	0.764122931412645	0.593835286905107	0.608400452801285	0.443200122832973	0.677012432629999	0.765174737637296	0.774980041611401	0.733721321474412	0.621324619649933	0.715614397206993	0.770484742822694	0.689213475756801	0.763552484212581	0.762750336537121	0.685932554562058	0.692110633107852	0.37413328784886	0.74692697791496	0.719439263505205	0.726183164789308	0.768341906742388	0.742631598512304	0.554704141822014	0.655424972626111	0.811518553268489	0.705694337944779	0.696872084764473	0.671033590492465	0.754318573979765
N-Benzylpiperazine	0.580174058131485	0.734545349088244	0.722826258233458	0.666873041985712	0.733085329114575	0.725404739229891	0.634966398473232	0.723055846596456	0.76521348144335	0.750589869923618	0.617271411541551	0.79303676696029	0.735058849318692	0.652170932920663	0.702140686815282	0.605991008903204	-0.444096867358329	0.687828273903089	0.626956203217196	0.591993862990185	0.824792564668574	0.532787806674146	0.704578839516623	0.544643677358482	0.796695881802555	0.757159991906919	0.715818966480624	0.83989532286649	0.631780229824458	0.473422070314553	0.74497184381072	0.596346590783509	0.668161600644135	0.682463560307474	0.691878685871408	0.490269450700765	0.53655358858231	0.740560576866509	0.749500479568711	0.596455748677901	0.776939448178288	0.598975107603798	0.42301336049356	0.629192739189138	0.70267473380131	0.731511459179278	0.827447166716119	0.599305909138286	0.607572355466265
20-Hydroxy-PGF2a	0.537188287479572	0.620351455604825	0.631970396868574	0.571096946281744	0.743515661891473	0.745704075356437	0.647594613399036	0.674696019121009	0.735065246192923	0.729376230600659	0.681659574802588	0.774839043688468	0.630843342385357	0.652128942502837	0.739227802458951	0.704293537988226	-0.548971611585031	0.763088865708175	0.73374737508504	0.653239965254362	0.704419394801727	0.570918625974847	0.602716746919775	0.492148426167183	0.623687231466296	0.750023544368988	0.711044511257013	0.678283634442739	0.641870818045958	0.669581527993741	0.736206410127676	0.706323985884476	0.693684422478703	0.810970644157823	0.692361556030109	0.772950761738434	0.340002575431556	0.729138749281433	0.624406212116033	0.761470740871686	0.739434656466158	0.655554030565383	0.501259252513088	0.640485492132932	0.767735102385389	0.630216791516746	0.653159855228619	0.684559816613905	0.800028634265419
1-Methyl-4-isobutylbenzene	0.68493779259579	0.688144498275763	0.673380906632076	0.676987733397727	0.841633846263271	0.839637360801606	0.650856758332519	0.827116010742159	0.849362191815319	0.848415793960398	0.712793585900125	0.870696674300806	0.763642170647461	0.761934538391344	0.818512913994441	0.695938291672315	-0.412568784077578	0.803158569979316	0.736218061816542	0.605821928528391	0.882014325974944	0.625515832463296	0.661473434634771	0.554648418723159	0.797295082264641	0.883148903523783	0.806700603806245	0.840972821625755	0.672690736660165	0.526787932056053	0.877487819967868	0.541568966609952	0.775825533169136	0.760665952074155	0.744291835020713	0.533918523580779	0.487870008872706	0.835199172594371	0.903136404889722	0.687705525168168	0.853130616747817	0.659919641051711	0.436345990317316	0.679140834652042	0.817154253141828	0.81455958291283	0.847061226063909	0.637637641893788	0.657922791170504
(5Z,8R,9S,11R,13E,15S,19R)-9,11,15,19-Tetrahydroxy-5,13-prostadienoic acid	0.630700296605879	0.66193834651615	0.703829071618084	0.688799616337208	0.880737792974701	0.876885500264285	0.706501976131571	0.812639704000042	0.866475518006657	0.87833829013108	0.742361112509251	0.906804380416336	0.753119649067513	0.758038847002519	0.869549830905974	0.725488266002297	-0.425281266939906	0.850360720714038	0.823596317411592	0.601286139539472	0.880939570831867	0.6206277330837	0.643494735948432	0.52588259989571	0.782300186208845	0.917601410957666	0.919402251499938	0.809497191805366	0.74066816504257	0.559174731327847	0.924416834203451	0.501478112526923	0.914395408262932	0.796650761793543	0.738126539806823	0.522291129418941	0.42380263136099	0.776454862505428	0.819639771603169	0.748740666319673	0.833849506888945	0.801868772821733	0.625440925580136	0.715138345762516	0.923071736960898	0.799178117180451	0.759080908829621	0.684442502090462	0.69501701792522
Hexadecanedioic acid mono-L-carnitine ester	0.527572510854431	0.533138072268305	0.584808079487979	0.447731554762587	0.329007993989553	0.323823939786134	0.303195097931666	0.335900775063859	0.355055460539112	0.302223083368102	0.14889801587906	0.411833889701057	0.306013057411347	0.380417563251881	0.322293776329336	0.170254130203771	-0.489950476341673	0.407539281173593	0.438308595742075	0.622786754678079	0.412001359689758	0.458022608705179	0.475773222342351	0.275078875399149	0.380304835594884	0.254314684964345	0.358201458205565	0.406646481936954	0.11626507413087	0.542700332110474	0.266945604077172	0.64920843354066	0.423991701894423	0.334306183620751	0.236678164534801	0.554395165985263	0.413723898788176	0.309739449128125	0.272782646310496	0.346209171992636	0.334903413017865	0.467167448707454	0.475489125026489	0.265128186785637	0.28769793829925	0.395163911912882	0.33039286924372	0.389125684293403	0.305383345297446
1,2,3,4,Tetrahydro-1,5,7-trimethylnapthalene	0.696947168322988	0.654215039532798	0.650394841687846	0.638440670934615	0.830072741034574	0.826465569451162	0.665390596406841	0.820810819309628	0.834620095230345	0.835152451959503	0.659751379317981	0.873937119372769	0.743334158455314	0.760163073814781	0.81029573732303	0.64597026982804	-0.442714152755569	0.785333292097431	0.754785652088951	0.617192118123832	0.881174895119304	0.651512232553164	0.617290690455852	0.478522392736226	0.770899609905164	0.876398240412668	0.822672932244221	0.828854487939105	0.642272287464201	0.519094384350334	0.872928364302721	0.50587230217104	0.798541373024884	0.748098094253232	0.690913169185306	0.514978780608564	0.481737753725569	0.807139711461803	0.905518502224092	0.675097336364141	0.858848640016337	0.704516029857862	0.475732182490831	0.616086663105229	0.824945259202481	0.821193650384359	0.826976270798348	0.600264737832448	0.6204659344949
Xanthosine	-0.537253942968906	-0.466784794487587	-0.482869293821379	-0.468446214853729	-0.480568074612264	-0.477629215563266	-0.476549049692966	-0.450468940940204	-0.47302890478869	-0.465623958708696	-0.350682529101458	-0.491683559953095	-0.442269515322737	-0.481042850709611	-0.469049577840407	-0.368442493464756	0.51218018276067	-0.502229087117557	-0.497769324975148	-0.433987678757999	-0.509996484546897	-0.51971059295248	-0.395636644272495	-0.382596945204307	-0.42074002456264	-0.453324145389044	-0.478564298415353	-0.4872897360867	-0.404018154801459	-0.397174784766396	-0.454070707561166	-0.426654715368842	-0.480876051127509	-0.465572740656137	-0.323080591953721	-0.389014383169921	-0.370234988077655	-0.372471141615501	-0.408138208910482	-0.468881883671853	-0.455902889475257	-0.484139520616087	-0.425077183320842	-0.450983677582806	-0.471298785310655	-0.416651990001928	-0.431552219747326	-0.345013240639845	-0.293717419693239
Testosterone	0.652347139441843	0.691722202303141	0.725682090745097	0.7066786823183	0.868678595561959	0.868413644994368	0.694144893526004	0.820745981205234	0.877809090843462	0.876646436870022	0.711412745120998	0.907549956514606	0.767501230419114	0.74189117008135	0.83147828501975	0.692874685547832	-0.427452471373326	0.822812468124188	0.771069820264419	0.587113414193101	0.941391548604758	0.677500751207364	0.661537930572562	0.53248050470369	0.831428548147212	0.915900303824502	0.871965444540671	0.884876821903946	0.733599141061959	0.520302305826939	0.928260350701602	0.511950298945604	0.841022621921274	0.796458133100663	0.738771028734227	0.492193715039731	0.537357309569817	0.819528950381539	0.875703611635353	0.699128062221553	0.897576915381414	0.706058723998412	0.503001275515165	0.69793304317202	0.868703898975763	0.814771251734441	0.870078197777321	0.630021463189272	0.659520269902895
Phyllalbine	0.623382633281446	0.638386624448957	0.689220058771122	0.70333957120661	0.897133404189856	0.892477860930643	0.780599268335378	0.831806544991278	0.88747245721305	0.893390504064151	0.748599470004599	0.912796850365736	0.765794525333385	0.745513977357527	0.875200199296038	0.72859946101302	-0.413725950706936	0.861098745489331	0.839214957214941	0.603739115453871	0.913319163760691	0.627321521987259	0.619403828198723	0.513989307901245	0.79938570711587	0.940656021723376	0.92344459323337	0.867412793544015	0.77837380047148	0.59495281673612	0.964913450209066	0.486179634857845	0.881308601565363	0.867482532869162	0.732441827373562	0.543646462893705	0.422074565360138	0.83468090949295	0.882222616931968	0.759839851698099	0.945995398352899	0.796140718266554	0.581054692483863	0.715643851245971	0.919810168766166	0.837100816588297	0.872252485270217	0.645842158654119	0.715119517619477
7-Oxabicyclo(2.2.1)heptane-2,3-dicarboxylic acid, (1R,2S,3R,4S)-rel-	0.452177006114404	0.499701584249039	0.476461440135014	0.555870952986976	0.585385435286563	0.599973741100416	0.409101639334891	0.545675038850921	0.592388336524245	0.569792873563128	0.536730593455252	0.462172733217082	0.515979614467042	0.652048884311424	0.603567248475292	0.550723876347044	-0.472977255016374	0.622416103157107	0.637475596689632	0.530428689423852	0.42396568650568	0.55487750301204	0.473058055445635	0.568238509182612	0.409749664471973	0.481208086358453	0.394163123534555	0.37141543802108	0.365614374404723	0.644983243738351	0.445843117862286	0.588266961842175	0.350898903845095	0.561760811765545	0.494175074618091	0.695289981577104	0.203203538861596	0.558322081269936	0.470635511175763	0.70137903847025	0.498787157894973	0.383673889407942	0.213803326796188	0.544384603430691	0.434642454550886	0.486040666715922	0.387748139650644	0.649386225116478	0.424095486581584
4-Quinolinecarboxylate	0.416801581531924	0.654937590039068	0.618029365798197	0.649084210681402	0.676726422938407	0.688914517034437	0.461712681163594	0.653235818469632	0.676351073411211	0.67747074297761	0.704176964722841	0.589560162345201	0.600410815187201	0.655347175847411	0.645543696591979	0.706841135588299	-0.446218845571096	0.682882211286444	0.613495063548428	0.53845859586576	0.544759285719377	0.521930738077177	0.607021093615747	0.659662447855452	0.546480677772318	0.613339554328585	0.452554618225203	0.559689613635184	0.538919753602453	0.585815778294434	0.557435850906318	0.734961999576617	0.394325528995034	0.660237999324774	0.703303469345697	0.744354735789946	0.330928005011668	0.663482024978414	0.522847123728452	0.740421440334184	0.573477587007508	0.359653587669754	0.158303219460839	0.640727784342005	0.555993947722344	0.54752029830821	0.517192994992544	0.785547542281508	0.646022188648018
Bishomostearidonic acid	0.653087321251957	0.660063211186503	0.67090338056665	0.699856916084098	0.879070643836832	0.879935809080311	0.715283907304069	0.850933408853073	0.885666066644426	0.889278188928629	0.750249128573809	0.890832197039929	0.793044841177918	0.779265147078245	0.865344710284906	0.732328986713427	-0.421412778561239	0.844750642038937	0.801790966254549	0.587598031768001	0.899703636791402	0.631714115431053	0.641114347908795	0.556160956827167	0.807001990268647	0.927714322324761	0.859647027631729	0.856738822506725	0.737715124552646	0.557881139783221	0.93016582093471	0.492691440228551	0.803041594387083	0.817636043296024	0.743510131131657	0.534040911222806	0.432698124351418	0.870252824763986	0.92487296021534	0.747380081050206	0.918900016886703	0.719533029072564	0.454290692241226	0.708855685040178	0.87014944949922	0.831573835395439	0.880874201697687	0.637137486487659	0.673292501158098
Alloisolithocholic acid	0.519026049593461	0.595969828081456	0.550352921303416	0.553949910698184	0.768510236458626	0.778131933312219	0.589377898664399	0.769823368349883	0.716503860598165	0.766734371726145	0.763608944017172	0.701269883869377	0.661515403381393	0.629688744815921	0.691568004376653	0.772328370135895	-0.498602817517998	0.654024235529015	0.633202102200989	0.478243443619265	0.658417906950767	0.519763511495066	0.561524517036762	0.477291593460766	0.610843734026338	0.762763465379022	0.625379876510769	0.698175157532439	0.63285793827014	0.465111744263749	0.717208564883077	0.491845753675039	0.568407261674422	0.650196499876865	0.770737638758792	0.582121910506132	0.374965885006129	0.700538928423217	0.696864610031157	0.665003886067692	0.695898724752146	0.516058638766496	0.302267099860669	0.550239632117485	0.682914083084352	0.662089782716218	0.679895886980894	0.645635810434213	0.683485789140987
14-(hydroxymethyl)-5,9-dimethyltetracyclo[11.2.1.0??,???.0?,?]hexadecane-5-carbaldehyde	0.617626526267383	0.683269639314876	0.716080021854066	0.717058492902512	0.909707810465944	0.905050818504934	0.742005099054394	0.844568448621206	0.905918599443243	0.910863120597346	0.78221730734546	0.920978163816675	0.802349493839471	0.759621473708535	0.887226130708926	0.76156743219309	-0.412029447410031	0.853506065240735	0.824388225149409	0.589156681748186	0.923802807624612	0.612405363343718	0.673645770362011	0.553363047355277	0.841836198706173	0.949510838821387	0.930979663135192	0.86888008111888	0.788686799001731	0.571665057109728	0.97053436352618	0.47687484467286	0.89692923009578	0.840111061844776	0.779336974316242	0.505470984024732	0.430671533392244	0.837772398160776	0.877147759386782	0.739933272708185	0.90014510115	0.771658374309217	0.583732584218942	0.758704985230516	0.922822038225183	0.837796713742834	0.859105309908317	0.676894021262752	0.708693052946319
Ginsenoside F1	0.504482889945786	0.625895192202834	0.632974373368956	0.581173870399449	0.596609357940561	0.604037182387766	0.571790101192574	0.606281035508618	0.614002162852645	0.593595193541029	0.534234255793333	0.631089052742866	0.534457474525068	0.568030926547031	0.584269329618268	0.522291139103912	-0.470430074015577	0.623528347902554	0.566725044546001	0.611254351564971	0.596932499142213	0.540266039552622	0.571522399592545	0.519822762628954	0.580109224673727	0.595859777613075	0.505038989158706	0.624641660478081	0.510261863385638	0.531790772898231	0.573600220283782	0.711688785087561	0.483788205470301	0.665178265420511	0.579020960112385	0.6553232590302	0.449667978395329	0.571292552566929	0.569622703191453	0.693593321423462	0.618812499110815	0.426181633709472	0.342955909602762	0.519625994621838	0.619267721874897	0.584045678494263	0.620636575001354	0.612396218265522	0.645423047357905
Peracetic acid	0.655398787734726	0.592749591217451	0.631953692391609	0.606008171643287	0.78003004668037	0.767449271359003	0.706487281842239	0.717652315279156	0.769390075026657	0.764612373295546	0.654131831886288	0.838235286397812	0.692824436879668	0.654575176699632	0.818393913707079	0.631016141853276	-0.403036527964171	0.757043201972369	0.757415591630452	0.686402271849396	0.802401318429201	0.53567048904045	0.630078338265842	0.382425831609182	0.747635414862889	0.823382795025425	0.917350159646261	0.785961768804353	0.680134912789789	0.646947451640183	0.871225100247044	0.463084617738347	0.922543045136693	0.737355701553156	0.680713245888002	0.498109995954899	0.347972832880129	0.715932886077374	0.766350737405294	0.679432330494732	0.776584930020873	0.86984406865095	0.778223419576869	0.689354118595335	0.878946049114594	0.76823550597393	0.718409365537547	0.640873953611451	0.726220748225288
5-(aminosulfonyl)-N-((1-ethyl-1-oxido-2-pyrrolidinyl)methyl)-2-methoxy-Benzamide	0.645274045675687	0.622578083342008	0.67242248643892	0.675139860717209	0.833538908253311	0.824389311710893	0.77086525691962	0.79613043310093	0.816928483286667	0.823777413100018	0.678865988684953	0.886270531382734	0.709864889335341	0.691287910653473	0.82533171264883	0.658061968501915	-0.388056580257452	0.812859380950014	0.79513838998965	0.634421136675314	0.873624932005307	0.561160616684128	0.604404774595871	0.444740423433501	0.764334770722468	0.882604724314779	0.937590875137184	0.851270653864674	0.719325103813446	0.590400296080482	0.930772102331432	0.475725169731906	0.925925033264638	0.807608519606634	0.68819808405272	0.561954845813755	0.402055480537371	0.762763799173335	0.822169027664201	0.7031864135903	0.874210474592739	0.839321852330826	0.70705040837522	0.665965170708163	0.909289966120861	0.792973715226308	0.82763727246366	0.640506156069185	0.72586783900018
Triptophenolide	0.629515969777985	0.674678273731158	0.647948359929979	0.580505564506274	0.759232483250295	0.74953427985582	0.662346756481132	0.75020597002718	0.762854812168995	0.766819255678303	0.655647375027869	0.817184194052184	0.703374729648547	0.673123080731726	0.767361942212014	0.649997923644308	-0.375610186888301	0.737521998641492	0.700062572145478	0.648860246506627	0.775107633594062	0.534883382038863	0.692157277787259	0.455557305065639	0.764897900947937	0.792575660372512	0.806093196565407	0.811748205640465	0.625882853569435	0.536847056652633	0.809756837204875	0.561459497393422	0.78547392973113	0.709185988431886	0.721597303359078	0.536865985938208	0.389995287598352	0.7500986695938	0.783466229381642	0.689910238254391	0.776642511487649	0.735203493886859	0.589900258133949	0.626096531847113	0.821807806946076	0.745280549224014	0.762665536616872	0.654800178688575	0.72066529237804
[(2Z)-6-hydroxy-2,6-dimethylocta-2,7-dienyl] 2-(5-ethenyl-5-methyloxolan-2-yl)propanoate	0.652555441866336	0.706647085207266	0.727665051084664	0.695988021632883	0.877720346440173	0.875315993729804	0.699152619631483	0.854372655844036	0.884131731519495	0.891520151918631	0.731805530309224	0.925646851029024	0.794643543771544	0.762526892134383	0.842106223663274	0.710716000485651	-0.413175395717157	0.826641268446782	0.769843661402481	0.586670094722215	0.935357382454059	0.635537100234083	0.680769817452323	0.546476093398266	0.846031038009	0.936163206827848	0.883053877296539	0.901752759157251	0.739813599603101	0.490512709261531	0.93364233562229	0.519240787318812	0.853483644859513	0.786897544912282	0.763166000421	0.487760102068343	0.516436237198367	0.828947660676117	0.885844356394621	0.696725235476426	0.887015235063262	0.705909066401533	0.506353217151435	0.692036763530266	0.885156583839418	0.828158758970449	0.888848869436208	0.627675063691628	0.687407265784253
Jacobine	0.669319211376306	0.624141985814299	0.683421109577777	0.649223754745312	0.849151443155711	0.846038970556289	0.730829153403039	0.821882213539476	0.834212793569636	0.849537851532019	0.703976065819257	0.900315932620992	0.733017320873272	0.725386924854924	0.843826467205574	0.683441205844034	-0.408894782445371	0.836404818193742	0.789292186237454	0.628179562408813	0.873020954639399	0.591625423629749	0.610269504237073	0.480501445348053	0.766701569055501	0.913439031152474	0.922210266289586	0.842795257907617	0.731054251227846	0.533446162765164	0.934894107864115	0.480328690040222	0.915044835709444	0.796162645777194	0.703953632919228	0.516726408716036	0.407492466915108	0.762306492149473	0.8292268063945	0.716057701277105	0.860759286154325	0.789897684756459	0.652039496252257	0.667234787240391	0.916584227054562	0.795151168549624	0.817047680943811	0.62623525508935	0.723952791046026
Oryzalic acid A	0.644105050684773	0.712026571785581	0.708028032027281	0.576587989168565	0.728123254239266	0.72163722609571	0.558677025833557	0.745277615270004	0.736952815057949	0.733927639256768	0.640912902255945	0.830460866943902	0.707919923963334	0.688811443465043	0.703059339418502	0.64358073492488	-0.431420792445463	0.703749120902504	0.620555505911587	0.648152050667855	0.77037693270489	0.607295418847714	0.735036151652456	0.511741541784483	0.761465820280699	0.754797808911828	0.716086865276621	0.786684417402032	0.559653441640522	0.504966664172387	0.710360312523949	0.726786433948888	0.692318871999209	0.679235831034506	0.749632993898082	0.607971788319614	0.508804119770826	0.744860714037932	0.686784700398	0.655020549651987	0.69507287632292	0.579752358088857	0.413533617166835	0.63246171950202	0.724986198983505	0.703589401794994	0.791190615205157	0.61517234455903	0.75623342351321
Orthanilic acid	0.674618377158056	0.585932923442346	0.641860354133814	0.61376462392438	0.796766750384002	0.789490364235032	0.778362146698931	0.75951549988649	0.786648314774415	0.785802946262998	0.669381642214348	0.865663612748359	0.684901294726981	0.656998642851611	0.808608489070745	0.64628448946649	-0.41011722504773	0.796669739667891	0.763080936410683	0.640064462792405	0.854811459853123	0.531700570192517	0.573531592367033	0.417234513095407	0.731058588845211	0.863621327079221	0.925163277120596	0.830692521098383	0.732050814485545	0.626574078964872	0.920489646788932	0.464950623100432	0.923724426641971	0.791549213762051	0.653480380591629	0.518332898949149	0.392043558837299	0.742347430415113	0.822947022822504	0.676627698673126	0.856252643877351	0.853110890885759	0.747434458879255	0.642591237655149	0.890499735120264	0.763466892773846	0.804657964192074	0.577191593919255	0.728685271053388
Ginsenoside Rk2	0.559773913951331	0.598866621501065	0.503389561949528	0.539771957195442	0.610785710653994	0.613329915057096	0.406098165344776	0.620508951406075	0.648615070643024	0.621973619409619	0.584724374044577	0.59086837788688	0.618802687771002	0.702590698985228	0.633825043940593	0.603806391251925	-0.529576985762115	0.632418061891578	0.536469965699711	0.62551272614424	0.539088036754451	0.525218993360888	0.597628752921329	0.596697729537248	0.572397656356009	0.573343500468277	0.473609016039107	0.554828953983814	0.42984134146972	0.477008943565404	0.528957493835814	0.693389601236303	0.448006398503701	0.543915548866095	0.617292783127197	0.64126180352025	0.307973567059785	0.68668235351064	0.64160530972263	0.628086594166584	0.5535076592012	0.370918213625744	0.213195983417599	0.607556519088143	0.510842308263925	0.552823855110409	0.55925293035773	0.648203749495471	0.554663460128708
Arachidonic acid	0.638244329480925	0.65887029500773	0.686550344754427	0.689410479503249	0.868348292561955	0.86934509335521	0.718389271400694	0.823280583411447	0.866009419554762	0.873231337977601	0.711470465419034	0.903166637203115	0.748681044527551	0.744581239722716	0.838194512034999	0.691185552297005	-0.402506742963081	0.821585309522195	0.781973624486697	0.581269641204167	0.909579666839642	0.634011425741569	0.628173680118936	0.510302336796913	0.80110610173554	0.922508884557888	0.878801989253849	0.874396689085156	0.731153382239699	0.498857022472105	0.934292510712202	0.488945571317482	0.851805056084463	0.800163344733741	0.722321645005111	0.509416545136471	0.467409405457658	0.818179614806735	0.907488002681858	0.719631241541321	0.905902463965829	0.74506972335707	0.522372558432935	0.669430605083544	0.887696031434135	0.820138661974473	0.849558739695261	0.614312170386482	0.679798058333552
Dicaffeoyl quinic acid	0.610632055862753	0.615481882097657	0.649318084466178	0.669574103295389	0.825326307850278	0.820665801685815	0.658181371011472	0.751894168634943	0.814319583767159	0.805439806889889	0.671440751167949	0.830126476100994	0.699463141948804	0.75260060050424	0.818350263626004	0.651925778900172	-0.35916215764297	0.790550106284076	0.810393913953861	0.531255486281595	0.797151598900409	0.683654998639022	0.638893582839025	0.539432256838912	0.737397875789654	0.828529715492972	0.808246583182859	0.708518358600617	0.64189610149182	0.621198406088997	0.815402717047581	0.535730905318804	0.757048422043417	0.789382928403369	0.661530824107066	0.536247310453954	0.4081412277036	0.762981314623702	0.773537325296429	0.74560158862824	0.765463715029297	0.771031686639172	0.477848019564988	0.713680687620139	0.792716015642194	0.793753042639639	0.723308931058834	0.628064745646438	0.642917327371434
5-[5-Hydroxy-3-(hydroxymethyl)pentyl]-8a-(hydroxymethyl)-5,6-dimethyl-3,4,4a,6,7,8-hexahydronaphthalene-1-carboxylic acid	0.627095030174993	0.696284569115893	0.726405062686749	0.703156954979089	0.879356839237468	0.877873219503081	0.709805228894562	0.829717881100546	0.886149242386436	0.886216684287945	0.729405891212035	0.917898150359168	0.775803900810174	0.737220558760186	0.837860604363609	0.708685568977629	-0.405868125887509	0.825291899543191	0.775775319104847	0.5813660865059	0.939396069179634	0.630376808396256	0.667922897522579	0.534351264023637	0.838788242145777	0.931655532152198	0.879188356967778	0.898500660379899	0.75488310568743	0.529128333904353	0.94023989413411	0.516331775233835	0.845743666798941	0.814473267273446	0.751937559232703	0.494874291580677	0.50391990716092	0.828371544182613	0.881528795416838	0.702550571488649	0.905402307392138	0.718196882946392	0.507213825084381	0.701281089449117	0.883004981377196	0.825642088758932	0.887062437350884	0.623306343950566	0.686696242679402
11(13)-Dehydroivaxillin	0.650832372321195	0.692149919664842	0.764844686949835	0.685095761475752	0.819707468321492	0.813114885242007	0.68083264673088	0.781240164998334	0.829092737228448	0.823348882565431	0.654797076069434	0.906002936916188	0.743772356566363	0.691077948450372	0.786244056334907	0.63321406564759	-0.42109197538456	0.804846762152194	0.755421457599335	0.593812296378315	0.928401097872819	0.590229674599869	0.67106111090148	0.492277590547928	0.822701349137656	0.875379489865868	0.889996978289984	0.890550077568489	0.699829970029318	0.540734408316803	0.891816925837436	0.528956680629901	0.887701098528631	0.757908477573426	0.698426406405477	0.464115212883219	0.527403126122525	0.753148847770739	0.799512919093737	0.635084731116328	0.827856512100308	0.748130663389571	0.593972095694449	0.686142439383363	0.856485837515659	0.802307086703322	0.842904847923202	0.586471357646546	0.653357343805485
Retinol	0.605981891981901	0.64617824687571	0.650472370120862	0.667165399436994	0.881602080306468	0.880577768655963	0.722036709389598	0.848022367794987	0.871580450681951	0.889385863060747	0.748322131149626	0.883633937208466	0.773723147567034	0.764832151167645	0.858791099638818	0.732691848480476	-0.41317816718332	0.82589324010298	0.807549881296912	0.558321111817385	0.87075352684633	0.616109708095038	0.616545464031915	0.537444371275869	0.781903876315114	0.918487290923472	0.872041330615581	0.836474555872548	0.734127381296284	0.493985353651977	0.92004618779393	0.462866849739647	0.824693048544833	0.804661194516578	0.740652745423921	0.5251689384074	0.404467000449336	0.827412653597162	0.89123580526264	0.756290809871003	0.905153821256466	0.75012586075554	0.488779146669246	0.68471328405114	0.891379234483061	0.813905948563315	0.8400618847365	0.640626813967342	0.668121311447431
CID 20054931	0.641419002092153	0.650506178597198	0.651590876079235	0.667954441969552	0.862620244548835	0.864656693584042	0.690113644446463	0.842092968670271	0.865020748523921	0.877609597815721	0.738756143734895	0.883763012604667	0.776865562177263	0.762850098273295	0.843783982299742	0.720753685071901	-0.4240850675339	0.820622508812083	0.763900845966461	0.584818238775261	0.891751800539697	0.615382282543909	0.624548481255355	0.525668382953172	0.792981803167228	0.919708010403893	0.848851053100299	0.855129438163456	0.719235381141634	0.504950515768929	0.919809426184381	0.481895074492309	0.803255191803354	0.778805782923357	0.741575766721984	0.510374205758829	0.434424368282143	0.848922669285833	0.921303946885745	0.715415690645845	0.899302792812071	0.691704674096237	0.451490893484762	0.671385286790695	0.862857578156466	0.809457983000741	0.857283347980137	0.621485828457832	0.666808658881682
13,14-Dihydro- lipoxin A4	0.505983684517032	0.671695273905915	0.570241913999826	0.51919312360534	0.710944489611113	0.711630677071548	0.463253594620105	0.770126380167384	0.699535918820478	0.722510962799458	0.786925325062151	0.660238017202643	0.710468326792987	0.689052881015971	0.697478168685546	0.789580901397159	-0.482386182221049	0.618677678892507	0.578316102138539	0.492477792399555	0.594272593860858	0.446887510294633	0.709280507668074	0.609860888050585	0.682651871981027	0.67228247582359	0.62574273679802	0.64394493465437	0.55606986140799	0.516795910602061	0.650579208116635	0.576806474282746	0.57228224468228	0.542832857134451	0.781261554610641	0.52603443449868	0.299808152217367	0.721224816511462	0.645530583221567	0.606066435784445	0.542735093204794	0.49367983940132	0.361664255890496	0.683878248075435	0.611105221146536	0.634819997620671	0.600648763964685	0.700454492285134	0.646403723727834
(+)-Cycloolivil	0.632609767125357	0.557955502145642	0.616624431735818	0.586517621638138	0.769456421333004	0.76024225877022	0.747348955606956	0.693595587902605	0.75246012815338	0.751228275487054	0.595683535933978	0.8343588623299	0.642174431937803	0.62153218903605	0.775880154219122	0.576742305862491	-0.381642865414485	0.756749815943469	0.760619779648348	0.618639955078598	0.819882459084218	0.52739519080775	0.539448960346538	0.355942242862678	0.699039544570815	0.822502213791187	0.914474930503899	0.77336081335422	0.679973578505332	0.606214359333458	0.881707390455363	0.403184442635514	0.924787467136021	0.755803442271336	0.592988272946792	0.458605175551526	0.357679177938722	0.673187402720572	0.774574849547556	0.643650523323599	0.824071926136734	0.878323156969624	0.799117967997761	0.607602940241262	0.874627517883336	0.746601541231332	0.719649005105412	0.532656319809667	0.648293776732713
3b,4b,7a,12a-Tetrahydroxy-5b-cholanoic acid	0.617545985260544	0.557937915842381	0.539381038329479	0.577908459924282	0.726994355552906	0.717319101779933	0.691976168358692	0.7257401652752	0.737548117622519	0.726357566469371	0.634376626995572	0.7639944894219	0.692968730833311	0.697813411065838	0.7562117350686	0.648848340958512	-0.476493428677992	0.718339594375827	0.723216519199491	0.639454250113434	0.719502173636343	0.575303590383893	0.566049350538347	0.455095823805877	0.67367491923197	0.749823485488944	0.775360718667137	0.697213195403217	0.588754040702426	0.540986159363996	0.765722382724186	0.509677780866932	0.737450294343947	0.718303500194809	0.631648621091116	0.64766328474441	0.334614165990347	0.798179661766686	0.778404030510396	0.670533703011891	0.790871269728875	0.670587025943499	0.516802866494315	0.640642119678923	0.740076194863882	0.72095404958708	0.751466162012783	0.612621991536309	0.66388248140454
cis-Dihydrocarvone	0.512797892848673	0.603242217558145	0.444589622241617	0.531144211180319	0.54957850839161	0.549736191641411	0.300706515617861	0.579572642074516	0.596326544335078	0.564615434536983	0.590487216861249	0.430058860067704	0.660291424595867	0.706719695647792	0.631761317186855	0.609293214309963	-0.430399362363876	0.531999302058145	0.519304286894458	0.502832234861222	0.405896116338377	0.437856044389995	0.633254454636814	0.622175745876877	0.5503595693502	0.454645318859616	0.377755035526056	0.374539413094863	0.311480201042897	0.561975261048007	0.413056805849381	0.50625836316242	0.312997923539918	0.384888366147105	0.626550301569204	0.546042340839184	0.15566850557608	0.652569106806669	0.557700757923784	0.516039931214034	0.380655728294633	0.278216993123747	0.146172968789955	0.639253868413354	0.333833697599804	0.522137719180387	0.405683935684379	0.691041973757305	0.360511718008043
Ibuprofen	0.626968738971769	0.687322668555748	0.721736354211548	0.690642177532042	0.866425400985435	0.86325660932438	0.706122838614721	0.812384193276284	0.873569069961906	0.871478248613423	0.708118005485653	0.906499386043778	0.759304470191364	0.718416507412284	0.822001237625153	0.688882666825534	-0.392794481258258	0.815823170783763	0.767192440772102	0.585109966140323	0.934827571811171	0.625251555305837	0.65553072924514	0.521647475002051	0.829395828794898	0.917180569695718	0.871086974069703	0.893187075558958	0.745309850708379	0.52191557874667	0.928981450842816	0.508450165132888	0.838095200874595	0.805032920260268	0.732295470090391	0.484820466399342	0.507605825768985	0.811759406423246	0.867751852499264	0.69101679475699	0.899711453379511	0.721515530532952	0.509211680254443	0.693291521423036	0.87301325480725	0.814391366533288	0.876836712889511	0.606309318200473	0.670306124453393
Ophthalmic acid	0.621677095230591	0.581047323297854	0.647973360505235	0.617354464533671	0.790864107545194	0.782920561448472	0.757921954116738	0.730573850266409	0.775265996425109	0.7798776274152	0.649479542653358	0.865253488818072	0.677747946279279	0.644746898819247	0.802163210045098	0.627269180357472	-0.394038070355432	0.781083442037091	0.755250502103862	0.655232900325978	0.844419751406601	0.525704059526816	0.579263301501344	0.391609745243022	0.733141722837762	0.85491509699382	0.934338728596557	0.815803046939087	0.718466693199381	0.590537044007392	0.905340111894348	0.44355984037793	0.947229432383493	0.777013329758863	0.648560131529717	0.480151299045049	0.373043035186782	0.712383319196877	0.792738960585888	0.659711668137092	0.83483442922701	0.859978856105697	0.769274897502192	0.646927864046871	0.896329526262374	0.757646489448068	0.766585965053234	0.572413267018002	0.719472508915787
Isotretinoin	0.621159621936379	0.688699013972597	0.721937090223229	0.697115512347632	0.873774204695619	0.872030209053467	0.711371053926173	0.821577527066496	0.879833935647324	0.880465863482191	0.723250801643712	0.91514407699566	0.769724691711327	0.726874921793485	0.832606046647662	0.701909564477603	-0.400330288395582	0.820391051377461	0.770184956290652	0.580076551444691	0.936453650860638	0.62397952280837	0.66183004066157	0.525092530683016	0.834362927611289	0.927964074485978	0.879990573336638	0.89768778229022	0.754769807739273	0.524399626112518	0.938325822341071	0.510249173701388	0.847315331386391	0.812492188678663	0.746005243640142	0.487322520006636	0.500827690579692	0.821764030174719	0.875872433003668	0.698273373138711	0.904650373615661	0.722742698061066	0.512995198517359	0.69682791186221	0.882787157513756	0.820788881517754	0.884736997122475	0.61575338262192	0.68677976059762
P-Menthane-1,2,8,9-Tetrol	0.49725673730111	0.696729354787595	0.655534316573423	0.660860502165929	0.749887033383828	0.750288468002029	0.596236643287507	0.76022977253563	0.771211303572744	0.774409676161199	0.799695186301857	0.719675300912541	0.819891337107088	0.72831643627612	0.770990906309818	0.78632991678812	-0.463147838738564	0.689762370832131	0.645899279786401	0.591547396277235	0.702158367872066	0.522536770111341	0.737280034594388	0.671271996676435	0.767752929461726	0.755963045969409	0.680027078055734	0.671019362860007	0.673705905952832	0.521360578769914	0.722745433475355	0.452306988155092	0.620565442875147	0.652276375620418	0.835860930709644	0.530715787136447	0.388082464213106	0.793732841644367	0.748306293338366	0.604297777641522	0.619113094081799	0.503067149966881	0.353598714172297	0.761442364826733	0.642444913017216	0.720352064920185	0.686343470151475	0.716232128234405	0.670571435570319
Arabinonic acid	0.669653406241475	0.569788877302563	0.617850190374704	0.609977632659354	0.787565214867652	0.778031402334315	0.719011398300971	0.725614082180641	0.774670161725766	0.776182871025528	0.63287347394438	0.837371884903414	0.680600125867554	0.637538057148444	0.80380640421817	0.612917963460001	-0.36018377101077	0.754475603287596	0.750972820109245	0.608743182416375	0.829440619445997	0.551512102031955	0.574107266515992	0.377211440534204	0.733835149823556	0.842490819903343	0.915818705389688	0.789248769579365	0.688334359504219	0.572737697006758	0.899222191650166	0.378793879867207	0.917099453991981	0.740385720604452	0.644899950591656	0.437859876678708	0.366216616898375	0.712899345173088	0.792665885915073	0.645896818347386	0.816228159247218	0.836199313407817	0.755639266022235	0.6456825294394	0.878676580423011	0.766472666443019	0.745323890901179	0.568064848280728	0.655354552656681
1,2,3,4-Tetrahydroisoquinoline-3-carboxylic acid	0.470485075483348	0.588810095507548	0.617578237242165	0.599648564427143	0.661753429756979	0.664001001796889	0.55061157725954	0.645266590178702	0.642355032467395	0.658537543721795	0.545383380856396	0.668912488764536	0.607031410270167	0.704812375884664	0.68038136370446	0.546988132103457	-0.418521271745726	0.655523598700932	0.706511619833332	0.516298561847175	0.599520631521318	0.500086092479912	0.584407073901238	0.463318793027578	0.573231684952582	0.645742004560656	0.642474089232032	0.556739707940208	0.441105205226158	0.579483134436813	0.619438821940922	0.508108357863557	0.674369604743827	0.577221962522507	0.569522117583121	0.583125622516713	0.316873471586031	0.594863788331463	0.574617047980158	0.599154397682606	0.566406225391337	0.639008207507586	0.496707190482268	0.534950172068434	0.628781034209633	0.715762773414327	0.513550171461607	0.637585120820287	0.528586366699599
m-Ethyl_toluene	0.609073088649491	0.656609700230506	0.698571551971803	0.689453073569716	0.886222602745351	0.884375911996435	0.717012405642076	0.829308823486929	0.877173550673023	0.889205517626043	0.75186579233444	0.911118884826367	0.758957261292061	0.727971896796891	0.840443287441797	0.730412514643602	-0.407973792999673	0.828067108662682	0.787959592592782	0.550259135976506	0.916364257553146	0.622105980176128	0.626190316485817	0.525899044955174	0.803301403421218	0.938846380792702	0.890842391256536	0.86837682574707	0.779419381381014	0.499866538462848	0.948168906788703	0.474671336886796	0.866567792281906	0.822063593974693	0.745590389002552	0.485631251291135	0.483057436844248	0.801984076458316	0.861596031864942	0.715918996018894	0.893575683330187	0.728762296159146	0.537239408078897	0.692752547149257	0.91085109700228	0.806440291922253	0.85075531939146	0.626250556381398	0.693812974979006
5-(4-Acetyloxy-3-hydroxy-2,5,5,8a-tetramethyl-3,4,4a,6,7,8-hexahydronaphthalen-1-yl)-3-methylpentanoic acid	0.443640649401302	0.568471725257107	0.452685626129745	0.553784733042223	0.540850398370977	0.539166849976543	0.351696843396289	0.551508840425632	0.583108427728198	0.547505334424741	0.594816213172071	0.445626620507658	0.622414024548469	0.647846526156428	0.601743254757031	0.609984476087273	-0.492446237933562	0.560260322641265	0.545017207736656	0.451507652585782	0.416293166656637	0.411858030585015	0.572554671079917	0.600701472169825	0.508354685170735	0.454506078982417	0.428160927161877	0.360613010228073	0.37284274837873	0.610710943102299	0.430657289113764	0.516882799421444	0.371957586209579	0.461109328650532	0.566429417656113	0.558171899474874	0.148748566112717	0.622573356913526	0.504066962619917	0.530812604573918	0.39967788668966	0.324793920238911	0.254607815834555	0.631907038951933	0.381824351672938	0.437928246298191	0.369298989902353	0.642176541057759	0.392096626576698
Hetisine	0.598361468922014	0.607526783283538	0.67141615562661	0.64330661347729	0.829815716554342	0.822910060015405	0.759013597110497	0.740170675209763	0.823525425669179	0.820836834856203	0.695800986761842	0.88866207741823	0.716681480890768	0.655504756816791	0.8242081824236	0.673521794585874	-0.393376889967989	0.801044922435526	0.771172631557062	0.632485840926056	0.886731128081343	0.550114900945241	0.613335642080016	0.430422865383973	0.779069850882433	0.891815175837485	0.929107369403048	0.850770604002022	0.772403319706201	0.627591749588722	0.932820572378273	0.468566378722511	0.911327225235006	0.823939701781423	0.693720594177793	0.48322391501373	0.405576057278646	0.768118889573109	0.813387434771765	0.683816685856964	0.876174883041265	0.849716724668003	0.698972266700386	0.694871967710324	0.902703551310659	0.782835293506247	0.81225864666148	0.590892096056256	0.737391348664237
(E)-N-(4-acetamidobutyl)-3-(4-hydroxy-3-methoxyphenyl)prop-2-enamide	-0.450103185861345	-0.513303633674108	-0.494236113378807	-0.398815965886156	-0.446778720059102	-0.446855439970948	-0.431980472161974	-0.463081713459608	-0.44477364189137	-0.438006926541769	-0.381729200368153	-0.433309423085804	-0.417908708058397	-0.472745461873012	-0.449715164464117	-0.379677660123955	0.461928663006202	-0.45573045760466	-0.487928098814835	-0.410987144582127	-0.423386000211285	-0.45706967973838	-0.46166869543815	-0.428690594443092	-0.393359549447345	-0.382537306388488	-0.417098437930008	-0.45030201130861	-0.303265278870404	-0.476046600055117	-0.377949839297028	-0.552509682017633	-0.403403680277141	-0.391758176391991	-0.410571372264079	-0.531997070289516	-0.288531372784551	-0.409435695587979	-0.365753731228026	-0.45477689405601	-0.406796888607818	-0.44985377292781	-0.37969972077609	-0.416712516015674	-0.394474746427594	-0.356643027969923	-0.369808836883715	-0.420901927415664	-0.357244007454872
Gymnemagenin	0.483570329354028	0.397066084855611	0.444115123758736	0.486278199924845	0.58064544451133	0.589486683760924	0.467944660308365	0.548294624817678	0.549797122426828	0.552406683213894	0.508163614881058	0.510227894989475	0.396527742056	0.593535189435497	0.555400778832225	0.531515235287767	-0.507835697028207	0.641730545820267	0.632263255180332	0.56064383068737	0.465924662322685	0.552771450153532	0.321710477525286	0.434539908029716	0.327433581538213	0.516690809028788	0.425535602261626	0.403827528788247	0.415617611150031	0.604301748286673	0.507776430020731	0.598702510787542	0.40769195158585	0.63371124469278	0.424147375161231	0.761665447172841	0.244316493975766	0.559767109175177	0.55064424955406	0.7153766164287	0.628357702475331	0.49113214527768	0.233540166988074	0.423265992239757	0.532633495958604	0.492059731595278	0.418234836545646	0.547835734542716	0.502891795774444
Benzoic acid + 2O, O-Hex	0.470890164021148	0.602848696181727	0.558692798489581	0.517418183110322	0.625990138968499	0.620589225305727	0.616457530223791	0.547454006389094	0.61853067485531	0.619067384346271	0.507423122458355	0.682738195249277	0.530425750344836	0.557306459871592	0.61974804193108	0.497266933837363	-0.440824839974822	0.60951712373778	0.612747364308117	0.578461675196351	0.641172527890377	0.579815852976715	0.550326334490413	0.443420819390299	0.575130080479698	0.62566175551322	0.617133369050964	0.625330085032352	0.547744201620465	0.549271885651645	0.609873590232177	0.590900943989837	0.606703098992397	0.631847586494225	0.575879827579243	0.561645931662627	0.446181206876743	0.564911076583027	0.574835478588422	0.59346971493037	0.610198583871393	0.659858172422396	0.482539145520689	0.517333294285081	0.658021482580792	0.591711673422428	0.538783993603767	0.524347446270768	0.651710284608419
Corosin	0.502657959463124	0.429879250639673	0.443670960383937	0.497617197867378	0.618499013434396	0.627758062956519	0.42586679606927	0.57018925063673	0.60586725884383	0.593579908961014	0.492679314486595	0.519492644879798	0.467022542741349	0.68753176501328	0.627664365221294	0.523438977426786	-0.460264829281154	0.684782882469819	0.710343784288506	0.537220916998593	0.453901007785865	0.636890465824257	0.385771800222101	0.455332347345521	0.362326754680898	0.537374585171503	0.432565307983694	0.37610605496917	0.349254182431336	0.669970598829087	0.487836641798074	0.598290267770288	0.401104085011691	0.623325689247245	0.442811451260377	0.767689965104847	0.197553619029327	0.573209357049283	0.515306434562463	0.721593724653738	0.575193177822858	0.496515846020186	0.22592145053839	0.465798941644781	0.498294448062654	0.559622698632972	0.384737641863074	0.6372411061807	0.44661689302601
16,17-Dihydroxykauran-18-oic acid	0.634009654283254	0.672203090036954	0.713114258152272	0.676847302766196	0.879858808136725	0.877462315732607	0.700167155629984	0.843562958218765	0.875371148340245	0.889417038302994	0.734081487604145	0.920909885365235	0.766686351104689	0.742016060976293	0.841773118889244	0.713308113736573	-0.388854784720022	0.833834913813761	0.781971611139864	0.567451575097827	0.917456403546838	0.621675221946155	0.641601522670797	0.526371454511627	0.817042478966657	0.941207828499727	0.890095707301452	0.877561195950825	0.751315469626361	0.493718943358534	0.939761400726328	0.499518935002071	0.856864919674188	0.800714319531872	0.751311217189547	0.488749899136694	0.474153622799611	0.802920853492737	0.852901495634325	0.708447503833686	0.882143512107355	0.711177621576016	0.521722091313879	0.684961753233158	0.902817476683771	0.813626993787132	0.859095171805923	0.627957974039116	0.694020526449619
Abscisic acid	0.646030004578275	0.682896793445023	0.760113880108806	0.666758554254434	0.802918207834182	0.796125063581944	0.66808527346833	0.771068983825252	0.811411156705314	0.805895142942568	0.643798417925915	0.894372869605418	0.728766786756529	0.671250026412229	0.771012466414882	0.623928844377901	-0.420045119979266	0.794608983268534	0.741329077778943	0.589401655491883	0.913431020365614	0.5753971174422	0.664346397913084	0.481204834031842	0.810586160718872	0.861261496413614	0.873660721280203	0.883574635051364	0.687030675325285	0.524783066113007	0.876697700349898	0.532673196508001	0.880040678308847	0.750748901784203	0.695360853762226	0.46779909975405	0.524783663011844	0.738968093812945	0.785047725043717	0.633635740813119	0.814718204415176	0.735553002061746	0.584899145761627	0.675182845924692	0.852820195327564	0.79048498762493	0.839071955775984	0.576137529317893	0.662086162410065
Fructose lactate	0.357508537157168	0.415533153219885	0.390602722834283	0.423752609879688	0.30525310199319	0.30594257727765	0.581130647732176	0.305821789015362	0.300200992659252	0.293325549484479	0.43822082951223	0.296185574293269	0.351379380531928	0.334661918782985	0.361106553229387	0.401360726662259	-0.486608098606878	0.342398153951983	0.337474880798117	0.455484791944857	0.209032865628764	0.318984163045293	0.363813781187066	0.504021887410077	0.275846178188172	0.275067308194893	0.289910729795366	0.268501358067119	0.458554335651023	0.431191112977649	0.269666523344437	0.487951221954112	0.277792017991191	0.410260537196394	0.36979369700964	0.517158666271399	0.348840650828789	0.262617961667667	0.222815025356619	0.534951271919645	0.280533278553078	0.31347360716674	0.449740225140434	0.409302024906983	0.384388057454483	0.244449575852182	0.282831223540321	0.401341153970956	0.526789828104913
Maltoxazine	0.577807027386095	0.560314458023205	0.571389761767841	0.608758610969376	0.712558291869909	0.712948801703248	0.549453761264397	0.731274261779842	0.705843709846982	0.693482193702028	0.624017327074386	0.647131276593745	0.626749464877756	0.720656670984125	0.734398659478592	0.625618178285797	-0.394791283268415	0.764515839516676	0.731458236205274	0.587476313227498	0.592146641297835	0.59512424801153	0.578409908171062	0.575671737306706	0.589191461404337	0.662150107016954	0.610886600507134	0.574063879299323	0.465845442994841	0.627202907986022	0.651042250875573	0.610776409392758	0.562854463702746	0.747685182006837	0.651411157975612	0.698016232174203	0.248853931384925	0.679701342711338	0.633338643168504	0.822926619004362	0.691358665747917	0.529244646080658	0.350885964826491	0.672712874052367	0.657827720007769	0.708252812996967	0.651152635249344	0.761462739323784	0.629810697987484
Isoprostane F2α-I	0.633378031345034	0.679713938949827	0.706521902173882	0.671039530885194	0.886092443314944	0.883686455725252	0.698079670123411	0.838847068483367	0.885759861756771	0.890182160370102	0.755562318158426	0.915247107193041	0.77830195057214	0.749549788827716	0.855150200364823	0.736382988024313	-0.396202817054868	0.839329108157792	0.793708313132697	0.544359287987313	0.91010061446705	0.603229876740027	0.649534365340181	0.541300528930472	0.809430547791557	0.945276118721918	0.886318173599387	0.849806321493075	0.766685146122942	0.547623907547186	0.938152410332945	0.490076943545835	0.855167232798681	0.816092494231935	0.759626125484214	0.496390232626732	0.456905314747428	0.805870407813431	0.835454968957929	0.711180605652294	0.856886189891421	0.72273253113024	0.533066869778314	0.709456736638726	0.90144415150279	0.813442536584665	0.839830680094812	0.645493696446943	0.692151910814952
Rubinaphthin A	0.490972907963869	0.571532500853334	0.611304615919737	0.628806916482421	0.798194775994054	0.798787087740452	0.727433243108823	0.725428604124246	0.764595802193013	0.774612242791628	0.622424437748456	0.750922989523396	0.624525532635008	0.715369221875025	0.782417257274176	0.601015455414607	-0.447756248035764	0.754915375116284	0.850117861975538	0.480915631635612	0.691359955291081	0.630118348367959	0.51882454651342	0.498846175021484	0.595974200551329	0.778635908260614	0.732135125648784	0.65018321360576	0.587585313992037	0.553180860353957	0.75835879838736	0.517378401975753	0.708667403660217	0.793452787340714	0.614659264265622	0.655414916804853	0.337750660402316	0.648604737151445	0.665429243884002	0.822340103595213	0.759124489530989	0.702344401875303	0.464612970526081	0.581956547977565	0.803295746410841	0.728017287523056	0.625892519425544	0.689783448366694	0.615456941521682
(2β,3β,9ε,17ε,22R)-2,3,14,20,22-Pentahydroxyergost-7-en-6-one	0.40876429756345	0.545223974476783	0.540760911636898	0.584339159124727	0.667952963250616	0.672335988038617	0.639650869763324	0.576627124276637	0.682195719186519	0.680423991176829	0.591861031284424	0.661037805998759	0.624067607293825	0.562786564888531	0.674911147745637	0.604214934477086	-0.460425517072857	0.625477924163211	0.651916176393189	0.570512602277069	0.664615801450955	0.540371009308481	0.540681960925237	0.435553365429146	0.625677781547373	0.66196561833568	0.657030475626836	0.622980099894237	0.590920666081055	0.557719538440334	0.68294617068034	0.459625617568434	0.614285578393856	0.648642672666702	0.58995875944678	0.561634103495377	0.364429023753448	0.685824745762338	0.639182609574082	0.612707182129758	0.718542959025702	0.646891671450041	0.464708415528547	0.580919848756879	0.64113387277527	0.623753746566303	0.598508316756585	0.606208039517614	0.561612847997769
7-Diethylamino-4-methylcoumarin	0.526243238206228	0.572672643321492	0.664669147496326	0.663619531728219	0.792076163509002	0.783655794631855	0.807209841138989	0.700800620946066	0.782093909495076	0.783910047363766	0.737913698046822	0.839460341416747	0.692900804305369	0.601835734209441	0.771329307917548	0.712641983729421	-0.403908086028897	0.75515629755161	0.715395819144562	0.569686378980939	0.843801823620617	0.489931809582591	0.563831473944677	0.488429582715215	0.736629970353174	0.852585120363612	0.879855454376397	0.796457223155104	0.85723756739364	0.566637348679716	0.899434036139661	0.42272639643676	0.861645918728761	0.822172267510388	0.659310590431912	0.465197083629509	0.463823616926453	0.720161801764863	0.750268530237263	0.631352835690391	0.832537496015302	0.755576819534063	0.673156136457394	0.681977411645305	0.857261136881475	0.701609868484657	0.801152323943266	0.528969624254327	0.738369779256308
3,4-Dimethyl-5-pentyl-2-furannonanoic acid	0.631369703324936	0.651173449114838	0.665139039063216	0.666427903311454	0.867869266522162	0.867168505983599	0.702793294955128	0.843498189894499	0.870555721230517	0.882402713708042	0.734044622846181	0.895369574632877	0.787772023525069	0.755527173894708	0.84805027008566	0.713011427855102	-0.399080247192341	0.824328973144766	0.775946543157701	0.563982885599087	0.900534692480409	0.603186592849427	0.627250116979469	0.523838279587965	0.803246465294507	0.931048772944386	0.870878713862585	0.858574712551981	0.733141978347668	0.492424444864365	0.928695739070543	0.45750624334496	0.825585268160017	0.788363633233729	0.738253845502987	0.485422864968996	0.435631804686649	0.835171895026578	0.896815508568791	0.708907914588549	0.895887465614191	0.706593286966504	0.474420671375744	0.680336738894438	0.877251612112792	0.817284784922989	0.86668282432083	0.614891726066916	0.663074945330239
3-Ethylfuran	0.618036904395177	0.408778804783662	0.52199371568889	0.545291897240784	0.486420869404463	0.482342502262773	0.546419703162807	0.464447114049977	0.47519997884332	0.448958923094098	0.349472206616565	0.534331876553698	0.395355580014164	0.488814550681508	0.540360513063723	0.343420694669235	-0.321413048872271	0.608160151215086	0.578521436811269	0.64020138154584	0.479830830749812	0.482662776643339	0.425142281216375	0.374233964812979	0.433114667056427	0.478158417593788	0.545369281632418	0.466980891391938	0.371293939283093	0.588063838803557	0.501262062951249	0.46285138820855	0.57415603978361	0.592750445501111	0.358494366772321	0.574155266349349	0.342294552220935	0.431579348056395	0.509284762055531	0.601642809657136	0.527651737808419	0.64668292545088	0.582495381025024	0.458758477117262	0.527775355521028	0.60015075481601	0.457762232616753	0.525549459510299	0.532486364468242
ethyl 4-((1S,2S,11S,16S,5R,7R,10R,14R,15R)-5,16-dihydroxy-2,15-dimethyltetracy clo[8.7.0.0<2,7>.0<11,15>]heptadec-14-yl)pentanoate	0.463485448910275	0.399396748374096	0.392315610739267	0.467353553008632	0.487115952733755	0.493593607688495	0.417165315675476	0.458667893043732	0.470475095025561	0.466158776108313	0.433523068403264	0.434191796801947	0.365921110253469	0.487166611140405	0.495236458124125	0.464684797975671	-0.47548145626111	0.530833259983438	0.5558980616356	0.599539251536729	0.372520507285131	0.511481756246874	0.315851752913532	0.387599151040177	0.306696433454838	0.405807118306529	0.368192341251884	0.321490803421244	0.330328898959536	0.575036191090126	0.408255969401216	0.5583437107301	0.361610785556073	0.514314840044463	0.395010497165189	0.719149269412177	0.230501884114294	0.476237241342289	0.433820056537027	0.625465048525504	0.50628382741958	0.424606286751649	0.263167316954157	0.406966017775001	0.449613394664744	0.399512363628185	0.348541152201468	0.53445185415728	0.446436185439282
Corymbosin	0.494654351719831	0.694865965680649	0.666095929047468	0.524186802288806	0.631021502836289	0.629986938947835	0.380853746059788	0.609032438235107	0.62217645779254	0.62112515417	0.434282803864772	0.664511489744634	0.551891110096621	0.525356110224925	0.501909613073445	0.438029683549576	-0.410560344618176	0.538812641071533	0.541611138198673	0.421863353455474	0.684709215637483	0.497329237346583	0.598459041605799	0.393491257068336	0.631204506320943	0.603245021689511	0.551903373474808	0.656659155534481	0.380616968149604	0.443504088120328	0.570096985822628	0.533366902807861	0.53268475156735	0.491225916368918	0.558351464944573	0.42703807030789	0.491508768149501	0.508640770466883	0.526820128987183	0.426336840049028	0.54339992675979	0.491507261467737	0.363053019796576	0.428359478917278	0.526467808312894	0.588910102583438	0.567383185324446	0.492646835714559	0.380208708495417
γ-Guanidinobutyric acid	0.430821835400276	0.63802245796065	0.5247017381798	0.491707617463857	0.352480548172211	0.344207442216426	0.17169065872189	0.403820190393741	0.407130847314388	0.369004975494113	0.329810391128379	0.316272085326124	0.505970974477273	0.516031411446319	0.390318897919698	0.336270797670297	-0.48747293323234	0.314250703934242	0.351884279062869	0.416462461233815	0.321118116025378	0.434751079125056	0.63964254712838	0.545873742354712	0.487941995900254	0.234398420064524	0.214799070166379	0.325452127494456	0.104521299785137	0.415487932519117	0.188063154395306	0.518410577488216	0.211930167577063	0.177175442859621	0.467625482133213	0.442434964181604	0.391600894214314	0.407581483232535	0.307575554907429	0.268129999042694	0.173273343137811	0.171251921749222	0.144092065915595	0.439963601440618	0.13429111567296	0.416602310096419	0.2869454968299	0.527428984950711	0.197443693563142
1,1-Dimethyl-4-phenylpiperazinium	0.427415934066982	0.660931806584654	0.694089641143425	0.670178734841897	0.560867110352994	0.556212600809358	0.549069425757296	0.554334259014325	0.597885626113427	0.582347131351372	0.616392423493229	0.596703203652413	0.646240136070519	0.513334406232998	0.53743963112777	0.613181161806072	-0.457205199407141	0.519438906955369	0.435821814390641	0.453200248139124	0.623375561169418	0.343823960919881	0.669159956394718	0.604826592363556	0.676212936250567	0.563860413039536	0.531488991915008	0.659477890588965	0.63639430137412	0.3833592710236	0.542505030056661	0.511012619263724	0.466825407711711	0.524709858161708	0.619563280485285	0.396083396826213	0.518835064978403	0.580050957290697	0.506061069416418	0.421587110817082	0.513749128437948	0.344969090294248	0.306073035492871	0.609477124866188	0.465819215468874	0.548500433894895	0.662321553818375	0.577379162127956	0.522267352454482
Isoindoline	-0.562968935182254	-0.528715001563067	-0.527173749246735	-0.568135810031247	-0.503579618239827	-0.499116250312375	-0.458061346131565	-0.517123384416439	-0.505814737769348	-0.495295910150808	-0.440524340994703	-0.514853294606246	-0.510435446839241	-0.495420247282487	-0.517998493367482	-0.405473977697538	0.267065331574276	-0.528741443376272	-0.51501649716816	-0.488178575941579	-0.500802172331527	-0.443662914652971	-0.501645672864719	-0.46347686234869	-0.510456240035317	-0.496092158897372	-0.519332804978287	-0.481759492886126	-0.397833970550973	-0.427792147805404	-0.486403652965451	-0.403821620894917	-0.510755325140315	-0.39976683589276	-0.452935005947496	-0.350256390147315	-0.430391589451187	-0.458799496894892	-0.505107131448198	-0.495003891487862	-0.437393894093472	-0.502988379049488	-0.429503105654918	-0.519787210768826	-0.484138231842099	-0.59286936257027	-0.442200052756621	-0.516586047226654	-0.386321025882913
(ent-6α,7α,16αH)-6,7,17-Trihydroxy-19-kauranoic acid	0.569702747395847	0.603461377157149	0.625260100761138	0.622423828520269	0.734724361922672	0.739413963938427	0.528792274207248	0.697055561680113	0.737283315859168	0.741867205164215	0.687600071141886	0.785907230285587	0.680053497464094	0.682787780841062	0.725364009389616	0.685931652910364	-0.371557243401847	0.75751797964184	0.629230641767138	0.617708521371716	0.702269460369953	0.570307573190909	0.668517609949251	0.559308364035442	0.710476921833749	0.778769151796093	0.678757079075664	0.753287670575674	0.651080026222116	0.511304953376776	0.717857053762329	0.642637857361717	0.632973856786633	0.744146929090752	0.727449282533209	0.58540464355245	0.389225783039057	0.741456822571521	0.71749181773927	0.745643739760321	0.699660511575651	0.588483871508533	0.357511165893935	0.717956041859712	0.74530833893669	0.698850698455284	0.709164415665793	0.661981979133979	0.77286054323633
20-Hydroxy-5,8,11,14-eicosatetraenoic acid	0.605621644929005	0.645187811784221	0.683456430224728	0.684954694718794	0.883007645881256	0.88108884816402	0.711099610848424	0.822335747280498	0.878472215657314	0.888016397621232	0.741567764675185	0.908746913882364	0.759851463847444	0.735619200212199	0.852307992824522	0.719905829515322	-0.385409947298989	0.833336485435042	0.792836453693436	0.546211778550279	0.915351994347748	0.613337405799151	0.621540012389022	0.517036376663481	0.804721144347515	0.939995503120976	0.896865429025086	0.860982309811167	0.767711210172804	0.512220718444797	0.951281649928614	0.458805465366231	0.870432324346192	0.816186194449912	0.741381904012888	0.47885737875757	0.449876442758347	0.811385528355978	0.871087553242809	0.716410713034981	0.893547433199859	0.737853422163767	0.533190325036974	0.702099820925499	0.912760687578386	0.812723169142288	0.845499037502927	0.625944467360627	0.682970596219814
2,4,7,9-Tetramethyl-5-decyne-4,7-diol	0.609808191223996	0.642255581430919	0.685510164709857	0.687569791734703	0.879657825231845	0.877499437750333	0.713995986546558	0.825122774623377	0.874452334489402	0.884887146782001	0.73275196212796	0.905858639358636	0.755399349510266	0.734301485252142	0.849641150049387	0.711041984330071	-0.380925535134896	0.835481140019981	0.793753053000789	0.55360471216671	0.913219683764844	0.617245950275362	0.619104239440293	0.515825208925806	0.80386756969676	0.935798467658073	0.89368506895558	0.864456425988703	0.757513982628917	0.503010816463282	0.948544973007794	0.458177288634515	0.866930376328559	0.81710500112106	0.737448208723914	0.48690481122371	0.449309108302109	0.812452182921519	0.87991052817545	0.723444903676154	0.902166182811573	0.739542315439131	0.525960309772228	0.69705601589498	0.909994443931603	0.819295316072515	0.851815012720017	0.624734306868283	0.683348926573594
Nerolidol	0.599691429255851	0.645373842190423	0.684281082589497	0.684395624511124	0.886464212447028	0.884640623421022	0.712979848222617	0.828624516501822	0.879769251386839	0.891112847629558	0.744973329204309	0.909847816296241	0.759971369194964	0.736848929919825	0.851945709771986	0.723128922881153	-0.383301477072115	0.836442076145244	0.796624403394188	0.543205727144782	0.912997381437815	0.616174098051755	0.620017132711351	0.5184885918155	0.802547722791764	0.941341795361298	0.898737046952037	0.860459307833249	0.769286408875247	0.510390480113624	0.952345939716235	0.460861468759468	0.870808268018975	0.822228845085037	0.742855524535351	0.482841396360588	0.445033163995502	0.809751604789563	0.868428292829256	0.722610279940634	0.896574325429358	0.739722688641668	0.534796265316085	0.701004333990852	0.916619446588116	0.812710814809312	0.8468942633723	0.628428305061007	0.687377501750444
(5Z,8S,9E,11Z,14Z)-8-Hydroxyicosa-5,9,11,14-tetraenoylcarnitine	0.559492012944292	0.579744883136675	0.614223911762946	0.455595671214161	0.488196556401349	0.478009909006522	0.494511039155838	0.476468679088015	0.507308492417222	0.47127859988892	0.289305029910905	0.608310257176057	0.4541758737721	0.447401412933354	0.478970458802079	0.28741780977685	-0.421926732058708	0.470920823552665	0.49788383757585	0.567914282920066	0.671330408197102	0.485589950766323	0.551894535465606	0.25199327783288	0.592499822347549	0.490590017052013	0.609530772096375	0.617645036992074	0.342176475815868	0.506217621310615	0.545219910733262	0.480567899017213	0.674919852664455	0.458311057145842	0.401706681409673	0.366433668287743	0.523134742408672	0.439004222560234	0.521913962383792	0.387142259360317	0.548373976139417	0.629693154602419	0.619433104960863	0.371837908234213	0.534142857632152	0.541720056784142	0.580449857134453	0.365296238626219	0.39497768010987
Mycophenolic Acid	0.229724951966533	0.363320907728758	0.358248686912059	0.466612245479545	0.339284375555502	0.342728920441294	0.525068522298582	0.311270554118268	0.346193456711041	0.337805906035198	0.602425583063675	0.26432494282675	0.439700979638836	0.369188380666778	0.379482104149922	0.589331006849047	-0.507749724765791	0.358823943462959	0.312259994659517	0.402248123552717	0.222351708403793	0.18521430895296	0.355917797027707	0.612398782815664	0.284130277896837	0.295052247303251	0.241325224679647	0.215071507084282	0.605490429836162	0.45846435212396	0.283208172526549	0.401547531346056	0.193720462844963	0.43865699736873	0.376339828139588	0.470258091651546	0.311793198960845	0.3528010390171	0.256134321879358	0.427337232752984	0.253706461621924	0.195630105375884	0.298062115307633	0.483463034662646	0.273768670319804	0.169388622027583	0.268013327081707	0.39204218230912	0.476744508744838
Hymecromone	0.534550707958554	0.543992731647954	0.586275120919978	0.633727296709145	0.814232759799683	0.811643325681433	0.654364718191492	0.735672411778293	0.792675805531488	0.794901151303039	0.634250052315073	0.770184977397802	0.661839683417948	0.717958839926953	0.813768744708033	0.623805716317816	-0.32358778482047	0.767921548653635	0.810534300352138	0.568894330612044	0.753324130913147	0.664607443363519	0.519215962816989	0.463766828953051	0.644722581888984	0.807366712877933	0.761773984113568	0.64647889254112	0.621342061589969	0.58338531629404	0.814947083800139	0.432897658750049	0.725652659301447	0.798233528135111	0.613419668509966	0.545043940537476	0.34224053824649	0.714666410097423	0.729155802755459	0.711445987485868	0.778487608212709	0.703479369513946	0.4632365375676	0.633460412435696	0.76504738608805	0.786108986535542	0.640495640385093	0.663556129442777	0.599672066188096
Dihomo-γ-linolenic acid	0.637922324225851	0.636430609185056	0.643436233223076	0.641483481495634	0.819480332219904	0.818600273655358	0.662057887198217	0.799902648092988	0.829170373470572	0.83022438263755	0.671457576635059	0.867922909337198	0.738012210123856	0.728105288845583	0.790397578360779	0.65104903412451	-0.410912094447875	0.781873960962838	0.725475371159694	0.555011708263132	0.887207054863933	0.60207322227506	0.600606613295774	0.485936972927055	0.771262757046587	0.885580086118485	0.812418131760609	0.841115039400448	0.676367870250547	0.484618865141121	0.879989649113188	0.479768782035452	0.780358337534732	0.75580783667443	0.689229824496645	0.47337502239295	0.475010788227452	0.805817235664927	0.88944770596341	0.656708413761881	0.864935186995922	0.66126992940473	0.428465475148772	0.625121451767249	0.824013768884612	0.790605272885748	0.852466048897771	0.562586026703765	0.625059046434373
Maltose	0.634486587367339	0.517698067157801	0.54148811182198	0.519313493273066	0.68955161946049	0.686110176331645	0.563407022854153	0.671557279848843	0.642654481794623	0.669418404127656	0.512625969166992	0.719552455849247	0.547120705197557	0.594157842465784	0.661784547883444	0.499277708075491	-0.350615462388646	0.625969828982899	0.656248298869236	0.557331509285342	0.659680975438059	0.513222319589946	0.512197858370964	0.258688838107111	0.583969533939452	0.714728617952753	0.745902417126387	0.660866661355685	0.45741399682549	0.460199556309405	0.72261509410981	0.392769936188303	0.767444413865046	0.546946516617568	0.596073728617432	0.473953616096794	0.32738311153181	0.586718627918474	0.693039246983974	0.558804661928205	0.650966258448494	0.686068669461502	0.603737475964243	0.443915413223097	0.724861227138159	0.703623738098687	0.581526858771239	0.58490905151214	0.563063374084748
"Phenylacetic acid + 2O, O-Hex"	0.557786868108473	0.61486856274715	0.667489776864362	0.640809570535418	0.839235080131573	0.832786831782551	0.744124015732165	0.756409216630363	0.825363600186886	0.828640448541088	0.690201643970064	0.87256957241329	0.698813996809551	0.663846900167254	0.81525504258169	0.670909110497877	-0.338231984063432	0.806444352082044	0.79035143515251	0.571254518513921	0.878335730802012	0.550051540482358	0.591561290920302	0.456325581536302	0.763840682935483	0.884519686565921	0.912902548907773	0.82958187890742	0.755608248334267	0.589256973693128	0.929044156796544	0.434374837529747	0.896006918139717	0.824532001386428	0.680310773363477	0.470155794806591	0.381175556983713	0.738780278812287	0.796520503514487	0.692257099881213	0.873050834454462	0.818450194398967	0.651886296566711	0.704183890423791	0.901076038197327	0.780581864498765	0.799541060186859	0.589005453577283	0.680719104273253
Coatlin A	0.604849387694855	0.657988771736397	0.702437557098614	0.691046424282379	0.802680272134498	0.806143852562529	0.631441201996873	0.754581058424525	0.81194907802078	0.815908898312295	0.646324456218687	0.851797823722499	0.704181875555972	0.689126346383669	0.772419590959371	0.621171351573405	-0.345938544300456	0.789476326768148	0.699512570751818	0.549016260645618	0.866217855366939	0.673434358095096	0.617341705562999	0.556278820402114	0.772576722644875	0.867401233343929	0.765590773605587	0.820702852828655	0.697330316571164	0.45707563054484	0.850127377511697	0.48065470883666	0.731883320378939	0.778666310046962	0.687900256890067	0.447834250387936	0.556018513302785	0.737340001346982	0.789140341730064	0.676585981885492	0.820771489546261	0.636921142591454	0.428984162558135	0.648092928349248	0.807287992560312	0.795976970433758	0.797467051704259	0.59300962187426	0.654184737025701
Tricetin	0.376675673909877	0.478709829954809	0.421579212914926	0.397875412647878	0.47937895616806	0.487731578530814	0.252489206585659	0.491267448176605	0.426728651911437	0.454150218775265	0.477821419356796	0.360760083885477	0.394695736781377	0.455871628092196	0.384568697960018	0.48919758003817	-0.434525164097466	0.400264251457914	0.40168143464418	0.287327455685225	0.318115523502341	0.43312782355163	0.466938770024786	0.416554908112312	0.344016590354804	0.368131523206246	0.237625418769656	0.346442742761066	0.249594709115652	0.449261166988301	0.292581629231487	0.523937344368243	0.186881975735276	0.360493390044034	0.508015474032432	0.459345717007793	0.279141617659053	0.384337480270903	0.305145022804789	0.459286266369787	0.291322166886733	0.233204328699626	0.0693206601248205	0.375867624122744	0.279019882403975	0.377545327304746	0.343877095903981	0.491226484646665	0.366205084476135
Isopentenyladenine	0.552001217795677	0.61234299590727	0.660735169005604	0.576458428322535	0.798550288945501	0.792333056236371	0.642919531527746	0.754119725917448	0.78743749041589	0.786320497159529	0.650878224495239	0.807640886072713	0.655577086246545	0.65075806519719	0.761787526041794	0.65612355165673	-0.466878021813317	0.759342410630587	0.794033627196471	0.544048056477916	0.796559115607256	0.564164010475018	0.575873449021055	0.433823458442282	0.694386976854645	0.801457181852374	0.825048040758807	0.751592674770621	0.637367273299551	0.554185336013989	0.83615099288662	0.480297415883715	0.831051827918099	0.749678178354373	0.638894456670409	0.510584257073812	0.349543505383835	0.713146094520719	0.714639946478171	0.633936173798061	0.803603910166366	0.708661910157655	0.573483366072711	0.587029287899297	0.801340497604657	0.760368454532879	0.75057576087137	0.58255419871395	0.597507059648027
Tamoxifen	0.586362718613179	0.479146339106527	0.565210397584317	0.537316644252116	0.567623837559083	0.557855567650895	0.629501952384192	0.52748372297701	0.569308701072655	0.541864239243841	0.460192463408489	0.62921651598068	0.540213280911315	0.503048410107028	0.639146162808493	0.453508990147725	-0.400108753713473	0.630464153205767	0.663204231668221	0.547670690833902	0.61623721882014	0.362709736614024	0.503346213623579	0.305608451992363	0.56418667713644	0.571188869665298	0.774428013526748	0.59089864530505	0.474715457309035	0.711800794064286	0.668817733376595	0.389819000019899	0.793160148479773	0.594482658915683	0.457134101361463	0.477764367665583	0.189739881214357	0.527641498355286	0.551478393376581	0.507179915413449	0.583774082225494	0.786034454374197	0.796737025800228	0.583891013419083	0.629285006928918	0.608198348618311	0.534913242668489	0.537425613303505	0.512320782459328
5,7-dihydroxy-2-(4-hydroxyphenyl)-6,8-bis[3,4,5-trihydroxy-6-(hydroxymethyl)oxan-2-yl]-3,4-dihydro-2H-1-benzopyran-4-one	0.581622803562504	0.430871877107476	0.452944880008274	0.412807922854842	0.462854468469132	0.447141624880324	0.495605565607741	0.425159566926262	0.4494916015185	0.436217805216002	0.259382334183749	0.517221998026973	0.371955761366243	0.411545490984773	0.4730589600048	0.266529930876565	-0.312509166021587	0.491007416149288	0.559983794328537	0.466055538903719	0.501352932037362	0.496354826654225	0.376980693514921	0.216656098570712	0.420070044710034	0.440379612309737	0.556997429800243	0.450666037960848	0.304586315478085	0.546049521000348	0.493075679612944	0.379524426996139	0.591976817562111	0.464131855712214	0.298568500560116	0.421573404615863	0.351287018976115	0.369234915659343	0.414256570879257	0.443928862235575	0.503346657909763	0.674911548544198	0.675834723232833	0.331807646961816	0.523455274809673	0.536534427504031	0.388538087343081	0.364379093828682	0.349335624405602
15,16-DiHODE	0.535055055199148	0.501763837139619	0.500752671528955	0.461474317634294	0.46987801048837	0.451901482861718	0.470330985613817	0.495116416705789	0.482663556640182	0.459193652533053	0.330598046261274	0.51074524241731	0.521467852381259	0.541158293753271	0.567501296261205	0.323038096689366	-0.39539727039294	0.502674232458124	0.536692841864848	0.735813814204062	0.471810045852304	0.397617115346382	0.562768010056791	0.366689453656875	0.542562948178302	0.432184687049252	0.569023588542704	0.472070669188543	0.269338026014853	0.512742170306874	0.471010660216771	0.400445525157117	0.586382560394877	0.419724084343313	0.432557928336499	0.441751118514142	0.169287958268393	0.49332104946637	0.577613208507054	0.438995415006326	0.453662088802745	0.617647368656056	0.56025697365778	0.496440049200289	0.452283381856849	0.606818388766518	0.459038844950795	0.47402728286669	0.420460571880499
Zaluzanin D	0.623769185858513	0.587573932488331	0.623140849245252	0.665170026546115	0.822923008232473	0.821422522551866	0.686498540449111	0.759346724619458	0.815010717027456	0.825603309922895	0.666378056357487	0.853497326398116	0.696133085958213	0.660420907163459	0.793540775271845	0.642939946831334	-0.334271844799612	0.776363159789521	0.745393582083294	0.527716774648412	0.863937354644456	0.626754087596536	0.559323838262247	0.451082861310186	0.74363779377694	0.885431030185161	0.870355992368813	0.82743011408469	0.723572123377534	0.453815438002328	0.909020844242601	0.390057718156372	0.847045602244291	0.763284803341273	0.672097922975629	0.465805217366764	0.460436456305441	0.755871997924915	0.823376499408139	0.672388195031439	0.870839138245776	0.745835733046955	0.576796554829029	0.643149264279597	0.878183235253011	0.750305296270468	0.788313553573118	0.586969816439192	0.642844718824047
4,4,8,10,14-Pentamethyl-17-(4,5,6-trihydroxy-6-methylheptan-2-yl)-2,5,6,7,9,15-hexahydro-1H-cyclopenta[a]phenanthrene-3,16-dione	0.489169273629332	0.544512794478563	0.489119229729709	0.554201676980839	0.727561016317056	0.724057467822092	0.627515838019559	0.700073778666146	0.717662735715847	0.720299669795522	0.62945927689678	0.689301885854624	0.619099808981359	0.695881915903428	0.732072812969727	0.643061990895794	-0.487543009222291	0.73513497785901	0.72311881022982	0.570298388491004	0.622581137828839	0.590810792089698	0.507740461219626	0.550439462533671	0.568197390128975	0.702169049565308	0.614654449675818	0.609453487858638	0.548221569755503	0.531781486598683	0.685206837504049	0.562642386588511	0.564760592302678	0.777771032766021	0.639206702080301	0.717972796196202	0.261854032533695	0.734336970033806	0.698518755868583	0.739732901209096	0.764770452876925	0.560648030406355	0.27594758293855	0.627075550038395	0.674969659506669	0.682117102365125	0.680101969295562	0.651879936217862	0.659789676641689
N-(2,4-Dimethylphenyl)formamide	0.400804750773164	0.583309208367787	0.559637211584295	0.606786136158064	0.581904191101729	0.588399784412662	0.390278548738468	0.524397331919911	0.619025599984864	0.584997225633111	0.519713930328635	0.504076165849128	0.541753742488563	0.603719987902111	0.613802212260746	0.530223204652605	-0.417640574555281	0.634927869696447	0.604344393544958	0.44189066164598	0.502268629089871	0.610481608907965	0.548021894450952	0.563577540231173	0.514325645574946	0.500525471554445	0.417657895034021	0.442530635583532	0.385145177040844	0.681552560177117	0.469003072758493	0.635468632721832	0.364838110621277	0.59769210877185	0.563821696136501	0.696002024489897	0.265362828881415	0.616702738164491	0.456684918925498	0.643846463142788	0.54401574279015	0.415838334283675	0.197483933134305	0.620323618016285	0.455260837547462	0.529417113651592	0.443295595478894	0.66044414561711	0.471887067436299
2,5-Piperazinedione	0.556463794351835	0.531518910094255	0.555648714659985	0.498311386133283	0.679931470472112	0.678659199913956	0.631736939310104	0.66322066517297	0.652560500914004	0.669057222471225	0.574548603397254	0.715003967761272	0.570487511661327	0.578753949704076	0.653701469238573	0.56769537645221	-0.388941513790905	0.636467754078541	0.613487190934697	0.519346694548395	0.752232965140836	0.534186433567873	0.499993170545538	0.367931045628387	0.617586198516067	0.71018620094048	0.735472301399926	0.697225234729705	0.600713526579061	0.471273294142882	0.762896150447134	0.366910573388016	0.763615074245484	0.634614547129848	0.576633685445609	0.423978013646431	0.467345533640169	0.589657786362652	0.703417895434156	0.549476410855771	0.705134795706066	0.671129814493073	0.576635491177251	0.512441907688085	0.721307960792702	0.61312574800845	0.668447950240198	0.479013418991562	0.562429042771144
2-[(1E,3E,5E)-3,7-Dimethylnona-1,3,5,8-tetraenyl]-1,3,3-trimethylcyclohexene	0.636007960689673	0.632497125105045	0.642275435154786	0.638890909249426	0.812991735723549	0.811805830717083	0.661885625039604	0.79265615119586	0.822791283802713	0.82300810173373	0.660545654356865	0.864553794240965	0.730046373020304	0.719024668047905	0.783492517665342	0.638429576461941	-0.399319287696895	0.776770090561449	0.721286214984458	0.550887149181665	0.885987371533371	0.598337180494193	0.592616656023926	0.480513450925865	0.766440483275967	0.880430732026513	0.810086855321017	0.836060882999787	0.670234659496328	0.480644085563069	0.876347671802624	0.473800710755989	0.780558826324741	0.752069744850711	0.679339134942937	0.464954165847364	0.477968052175717	0.796635435920405	0.884569503248724	0.649823165225769	0.862419486931251	0.661900587911057	0.431819860968275	0.617404024220944	0.821899278753527	0.786323711700027	0.84939805701334	0.550760928048178	0.616968974042214
Secobryononic acid	0.520197868457853	0.375683080251484	0.38549836184317	0.469161992786774	0.445089975637189	0.445962315053661	0.370813464778693	0.450165305644363	0.442995467775779	0.425894908979598	0.349421101167077	0.398721051572253	0.37614726064425	0.530558473291364	0.503693474594896	0.370047763273829	-0.427795491469994	0.552370850862354	0.569983743812662	0.582585473693909	0.362034689005891	0.505575287636676	0.364133183290916	0.367625421685695	0.326315989116234	0.377644994759442	0.362767321033489	0.332537261443427	0.208635286752079	0.608124092462715	0.366020769508272	0.525715114495591	0.358655538756324	0.455595918167171	0.365525798333527	0.663096806244897	0.174487087147067	0.475006957702259	0.436976628784354	0.554648715355429	0.464935166819768	0.405409497409905	0.285496244279235	0.393769959564696	0.366275574873725	0.474693216192709	0.346885515924244	0.519800494052571	0.37844904963228
6-oxopristimerol	0.520200551431434	0.4899060171589	0.440598085942678	0.482540492367618	0.604190568763987	0.606321026936778	0.521092753786729	0.619839789213931	0.58997667173076	0.603904168172104	0.605144770682839	0.543058732148285	0.557571430329609	0.600463957442501	0.623243880625557	0.606360477511154	-0.540969660140114	0.580235155363726	0.598905048052878	0.487379448544705	0.49051624216578	0.501716938644532	0.431119140862293	0.486975332644064	0.469268681024414	0.583436160522931	0.475554171360689	0.511622061691451	0.469657198166577	0.435768194212405	0.554574999405276	0.482670553976192	0.461042739248896	0.56333517901005	0.594844849039972	0.654203079532765	0.291973215951933	0.629169740143581	0.611960162529606	0.637879852817659	0.597886762061812	0.403564382124354	0.252063425578231	0.518920148204579	0.570876538701359	0.553957403792743	0.516822544755824	0.535630242456329	0.559836259953792
Aloeresin	0.588804467485083	0.617636070781007	0.669921750363052	0.663385628312992	0.857150067483892	0.855138640249101	0.722535365968801	0.771627488970167	0.853423957938514	0.854938698802841	0.720233804903175	0.895273072768227	0.723906033150791	0.682655827675804	0.827835352127255	0.699394461000748	-0.369650310244243	0.818696602576485	0.773637056588503	0.560751720086725	0.905627704519935	0.581633827497682	0.596661439236789	0.472208846183305	0.779149656503877	0.922154120819488	0.892457463889483	0.845547457009061	0.784509540740688	0.581880428809899	0.943792415308615	0.45552663485639	0.869480235405265	0.829562988254073	0.713869875503157	0.469709081109035	0.438334616214017	0.783150767784192	0.836867819157266	0.695749373418785	0.880695625319501	0.772094827714975	0.58505659742958	0.692114805601478	0.906174464595275	0.789558235883218	0.820811565367987	0.601169166111785	0.70022587471709
2-(4-Hydroxyphenyl)propionic acid	0.439678760773245	0.506591833391192	0.472938005473401	0.513421870285154	0.592991397345081	0.59553138516718	0.344954654439634	0.549765518372574	0.593045357851371	0.572794587180304	0.391722734595642	0.49747877833606	0.483969595510503	0.633178337533521	0.567069953578079	0.408518797172327	-0.382140881764371	0.590417782717678	0.672551071475106	0.429538072258437	0.466619474989932	0.615364959390796	0.444783043557979	0.475864565499132	0.431981017935965	0.496698955603137	0.401623773171118	0.366470306072271	0.250749944745199	0.536483292059592	0.441133498077099	0.503431255196645	0.35520417744014	0.531998308944966	0.43564189650891	0.622429404929399	0.263113999272072	0.531107666220878	0.479395351502912	0.572051348076549	0.512921845596753	0.436385037672001	0.173327436276478	0.444340554432261	0.403879962082866	0.571322072608806	0.36435360940893	0.598751092261354	0.300300272000728
Linalyl acetate	0.459943048577712	0.583434585429865	0.582829565668955	0.530301485165157	0.62465511402098	0.621456565686408	0.540629374288766	0.620782902202341	0.665153526622879	0.638368087954276	0.63426106207105	0.660196795482903	0.696496773482644	0.606940995135854	0.653704917080062	0.643266602108491	-0.567663884258563	0.631474183717737	0.568386849064396	0.650507822312893	0.617689958293008	0.404686278370688	0.629379987440572	0.484465149246196	0.66063973781088	0.634996104104657	0.659163064791299	0.68476412687918	0.590479231648293	0.544105623856635	0.651666133540455	0.551326270289172	0.619358675397865	0.65916249748065	0.635151313081355	0.573974612213904	0.252030695033716	0.684254468277945	0.618563617438776	0.551964501958757	0.643180441936104	0.535050011432693	0.476768461467923	0.670043854854799	0.590373121619632	0.605413360697851	0.642203661138425	0.663063941461371	0.644184313459349
Tri-N-octyl trimellitate	0.534602906296201	0.529911052669769	0.467904299659058	0.582022432470397	0.623701109939295	0.61313140692366	0.52773730310748	0.617170553432024	0.636964561874127	0.614637703785219	0.528017083289051	0.597032623859828	0.599561873626379	0.650014492016024	0.667499444668828	0.545367909519917	-0.205016254489106	0.638953547632602	0.675257268040667	0.59689343095237	0.58482939712165	0.446213872855838	0.541919362099839	0.420965886836037	0.573328351570431	0.588120047642228	0.593708227643955	0.516952391812687	0.393098355381318	0.639807710689451	0.608081828491753	0.488700612798658	0.552969167072775	0.58262814769998	0.587138634275752	0.61524401849807	0.185306036479438	0.722107294842977	0.697382446768818	0.585933756677578	0.648477603862333	0.557091673424829	0.365407176554985	0.561606868829674	0.551046590849819	0.612295164403799	0.578186920925997	0.649964855500762	0.498193983322635
Alisol B Acetate	0.490077602845573	0.505100833672371	0.518954518591696	0.524830629495391	0.698386403900595	0.714024021849052	0.5196168446387	0.640653301342268	0.694833347784191	0.70786840633357	0.639519744463785	0.690865299998696	0.548996757947488	0.6015415007777	0.666366210290974	0.654432556351665	-0.451409862751169	0.727470798995053	0.655598391509694	0.581435987636111	0.640047036384069	0.580612901514001	0.438088547003361	0.46630678623763	0.524443045120826	0.712002115106614	0.60795712878524	0.622693797596934	0.610831014185521	0.504022822604815	0.680969931935832	0.590843642706465	0.586349269291694	0.680153235635488	0.593195210854957	0.637917626501848	0.319212232246762	0.688999636092177	0.663438853094581	0.750813280000254	0.740597750547696	0.54980616242132	0.31659124811704	0.532176430622172	0.719636169074446	0.566187858427489	0.586393366132393	0.562790094569746	0.633383190878495
[(1S,2R,7R,9R,11R,12S)-2-(hydroxymethyl)-1,5-dimethylspiro[8-oxatricyclo[7.2.1.02,7]dodec-5-ene-12,2'-oxirane]-11-yl] (2Z,4E,6S,7S)-6,7-dihydroxyocta-2,4-dienoate	0.677938048654453	0.598446105722016	0.610374641404932	0.495191423568991	0.674310329884288	0.66875956667682	0.564127793683492	0.705663841757447	0.68631134596495	0.673870882875966	0.537585195668574	0.749573216911686	0.654537766385861	0.610943239883386	0.671622431492881	0.53639462757565	-0.422105021726843	0.633084105942487	0.628418769642325	0.615284814010052	0.736080517401795	0.495607698099528	0.617276158438055	0.39289927836083	0.691733115980232	0.724744942743188	0.714657886801196	0.737690621869713	0.546514690210191	0.42282418841207	0.711351300300577	0.495544532423492	0.694954641390601	0.60861091646052	0.599880355469488	0.465189845886284	0.445958037179692	0.660242547890917	0.674721078324304	0.579062090961598	0.677238636907388	0.612959153813874	0.466971546907366	0.53133147073102	0.689357805710499	0.689468447513727	0.753222436883133	0.532290896648367	0.603869947336655
ent-1(10)-Halimene-15,19-dioic acid	0.40001850909882	0.571820646332124	0.429950020755448	0.50669174203029	0.537510917474551	0.541043644566706	0.340593365502795	0.564437325811639	0.56014011940751	0.561683323302117	0.643115017155783	0.475974880077984	0.666960730862326	0.657338340118418	0.59889524704703	0.644674110096737	-0.356280630132589	0.504188818603059	0.460936277088177	0.40759355842484	0.406647771420312	0.394596312462602	0.665777176383127	0.622004617538013	0.57620736227645	0.493664513843636	0.42264953582828	0.436169565612981	0.411109280339659	0.505010600642063	0.426749141218559	0.503059419774548	0.329907110188939	0.398860918901361	0.641010326659477	0.460916000441999	0.190482263703298	0.660786809436053	0.518627596346389	0.515181763182444	0.361437535301019	0.345656930410297	0.16480515330226	0.668796717646527	0.388128169112348	0.489507338775088	0.447859450861021	0.571495446579191	0.496925990444178
Inosine	-0.503502592182606	-0.429004722207777	-0.451155035626639	-0.450933809417775	-0.430626717150714	-0.427279202495995	-0.454606871056717	-0.395349338452772	-0.414708272475855	-0.412571820107975	-0.260545277413801	-0.429164609345482	-0.368092330350446	-0.411156494849916	-0.430106041234164	-0.240727078315119	0.382468884722119	-0.462039003234303	-0.449772836356393	-0.332096344914375	-0.46594490162168	-0.45094624455614	-0.349437875905528	-0.367746243249227	-0.390870156947122	-0.400557737932403	-0.460533051284692	-0.451628957962428	-0.322276867105166	-0.355609500525291	-0.41962067733269	-0.323776607329825	-0.469789680550008	-0.395763044237797	-0.274944926867816	-0.262060092889006	-0.317908197629431	-0.251880301608307	-0.372355842310145	-0.453567522714532	-0.397746320440418	-0.495265694864291	-0.460243057987858	-0.420830678300439	-0.454612691245872	-0.367591168835961	-0.362701308662715	-0.291171291915236	-0.208178743860846
3-(1-Hydroxymethyl-1-propenyl)pentanedioic acid	0.422757576052078	0.609561299344774	0.624216398877218	0.538998588866821	0.558963425190547	0.553940709467883	0.684329138402788	0.560967387501875	0.56323972492244	0.569524177680897	0.631768009884062	0.670849798599616	0.577662330645212	0.46933194779553	0.555950176126485	0.593593049744256	-0.493637753669378	0.579699400443942	0.44700002361697	0.585666414431893	0.57095025560125	0.400800057173716	0.6122697668103	0.554890148101848	0.597946630938875	0.623237388502873	0.577584987619094	0.691775723816815	0.685871922729057	0.448600553674816	0.58295085816133	0.684162859146327	0.551021403336898	0.680805294336498	0.654726414467874	0.568300120142153	0.480422504031911	0.560215932504571	0.485765155363651	0.625982871839374	0.557434719079744	0.499170507240021	0.45126969626286	0.581722250626901	0.662869537958019	0.515328804344344	0.677291897646859	0.533364475370069	0.875412023029892
3-(3-Sulfooxyphenyl)propanoic acid	0.39453870425334	0.498757980686181	0.46656260434613	0.508291616311457	0.573463713007924	0.575845198381067	0.35381025630511	0.534109937369154	0.57324341958423	0.553308777547939	0.395370796912888	0.470692942606894	0.483626094294279	0.636407899617837	0.555217765289219	0.410441645373377	-0.409705576892269	0.55814933409462	0.653907231018932	0.410733647006931	0.441219265266637	0.564422884182849	0.437639988459282	0.496949968545742	0.413579193075358	0.474109046653592	0.378247024632721	0.336658045966872	0.258375677795023	0.531459732621467	0.414867106729335	0.492012728351303	0.33462697284395	0.512875877707302	0.413139318465489	0.635590173739915	0.256017427142979	0.515887560986116	0.4486037629478	0.544139234129694	0.476749196965209	0.424616190148302	0.163003609087378	0.436652031992788	0.367860446993681	0.552523896698819	0.34184666271716	0.578936384905926	0.291510433379013
1,3-Benzodioxole	0.396504086184063	0.571076857771997	0.395725947150144	0.503817729234936	0.48651833738856	0.488562328171671	0.243883251522966	0.510737522177445	0.536164943797396	0.508428361743106	0.561621555232427	0.349251461432969	0.622603163523191	0.662161800043631	0.568198374187915	0.582328533399744	-0.428347725522119	0.458570683760789	0.449219480467423	0.421062302465014	0.337193915702928	0.3695714559236	0.605445311727477	0.62049794251372	0.505574021324113	0.377456974405284	0.309230197543973	0.294486660956609	0.26558144084043	0.525521057003551	0.337656864393128	0.443856993595458	0.235291928768546	0.301129585500846	0.580791651930445	0.479212712234797	0.109417829919533	0.601220264653434	0.481555444406399	0.437645172743428	0.294332213345908	0.206410593119374	0.0949135686043945	0.601945826335291	0.244381551681133	0.442965504012736	0.325994343667999	0.634081450069835	0.280495453969861
7-Oxodehydroepiandrosterone 3-acetate	0.424709674813673	0.523509445496447	0.531656036452497	0.444535030632777	0.513627395897045	0.508349909294524	0.456666473430018	0.57041501322912	0.516821217670194	0.510873676845684	0.570448414442333	0.536676968442491	0.500530206476415	0.519652025961474	0.484593370850878	0.560667795220257	-0.527613977240893	0.531303556900739	0.468719085268628	0.539502919489845	0.466111881132087	0.37617117911888	0.496520577724527	0.532237227051587	0.480068405261315	0.478968982134251	0.503683922682611	0.499344049732149	0.490290290375101	0.449749873578073	0.486709883868972	0.616548508434143	0.499714334636358	0.518146568385141	0.478632861353788	0.521750528286021	0.356926661121346	0.483860357970451	0.456985774787179	0.50653116769099	0.445690651239222	0.4320737652709	0.445505343208685	0.477153091612261	0.495935839283488	0.459330389283955	0.466786989088484	0.533128693030204	0.564138481407601
Sucralose	0.656978270989712	0.566769343294498	0.595392419291333	0.571897902696195	0.779768285130267	0.774163933998431	0.703297713177935	0.780921588060665	0.773362299228939	0.78589983194438	0.642509919810787	0.84244815755136	0.697034040440002	0.682561380707749	0.790714026873324	0.627785042082264	-0.340788482188469	0.774540919001409	0.719341939659166	0.601884763937134	0.83211018590067	0.520375821433682	0.555839131348868	0.413415456023353	0.726627689570279	0.863182960166852	0.878906926219407	0.817374776911045	0.674178269254574	0.469386196805171	0.891949492872891	0.393862139933261	0.871198256074778	0.7227366798518	0.650417741560675	0.448326785669653	0.364662219617182	0.746502521425915	0.841241065886077	0.639498149317599	0.838898768487068	0.753191773044918	0.61581300064167	0.613580155676123	0.862840155108105	0.760520502920304	0.814439322959933	0.535422538919532	0.661028917126615
Neriifolin	0.571700662878381	0.566371236646848	0.6062936150583	0.616736755623851	0.787191847809933	0.786254803897097	0.616655913202187	0.743764351763869	0.781274974992536	0.786339747044458	0.648605637758079	0.811385946491829	0.662222283841153	0.710056312266585	0.742497482715801	0.640171516462776	-0.393100258250324	0.807246931148708	0.7608528507653	0.509944815786955	0.781592131124568	0.630488666300495	0.517010770929148	0.471904728039419	0.652869513624363	0.814267696384742	0.796311758733109	0.696214848913353	0.642282837234084	0.52824079374346	0.805712787408248	0.476003805229124	0.763087660183252	0.751495691389643	0.619288702828189	0.522859813074895	0.376871240319796	0.706982740573751	0.738480023271624	0.706759940460868	0.771232607276866	0.695281302991595	0.504450610078429	0.630818120085522	0.817383072070786	0.733489778425331	0.689400906756698	0.609389933032735	0.579480545742146
4-Anilino-4-oxobutanoic acid	0.539022140768345	0.327112904458126	0.40743046549196	0.384597510912765	0.525517481808053	0.51513170953433	0.549848945748798	0.460901081017742	0.476135106961849	0.466778101331292	0.306583173739565	0.518573407430825	0.357427116047938	0.486303643367128	0.561335719534596	0.316672104034693	-0.268215434651236	0.560593593049535	0.68818033998778	0.501026281609622	0.437322037139364	0.529766127801792	0.337070449007454	0.179942657805453	0.357268552180782	0.47977875686325	0.590670572632149	0.40039836892187	0.301625496531752	0.626875076672075	0.512302834309206	0.398488304660415	0.60939706970126	0.580072485497417	0.296062910051319	0.535782523929774	0.172166578691017	0.402395457834365	0.446394930307164	0.596200328762072	0.538241085184642	0.759000065032311	0.640744097771357	0.383912364085781	0.56107248329739	0.594006496312964	0.348052540932105	0.451300158763924	0.440115367984685
Walleminone	0.517367954769405	0.356023592010521	0.37234489594471	0.370993037336554	0.3720111239331	0.370363044355633	0.364010291474132	0.389793701185507	0.343164109639469	0.349499668446094	0.353287320173725	0.368132128855758	0.312661909345004	0.311857666743237	0.333371228346009	0.386212325112175	-0.460521274586342	0.293876773220631	0.324314978640276	0.381100385556284	0.364883429245939	0.453480647747323	0.342561591828066	0.235914436180762	0.32048335128599	0.330506457461685	0.335741244990338	0.349025504466806	0.313573818837943	0.312409674624865	0.352490218667371	0.364215218953089	0.373828275168523	0.337315134913117	0.356139758451319	0.45547298973459	0.499084677721841	0.321481231812194	0.338676273139935	0.342562544945228	0.351483700140777	0.334124404390105	0.388872887642595	0.229909448781225	0.331572411263407	0.267506382346398	0.356205568509493	0.404236391927349	0.388478646418721
Primin	0.374688650432596	0.561937483722686	0.435859217130948	0.347985738950919	0.403799807738108	0.397371155319348	0.294485345133712	0.491917453732022	0.416910876319766	0.399796759231561	0.490299090715436	0.366728553192881	0.522167535964165	0.494252444436232	0.451583596594241	0.511905259284262	-0.500931222225814	0.353437621246716	0.399068497690466	0.567943880699818	0.304220852730281	0.224866651216639	0.587675465501591	0.424730715854818	0.452244768888244	0.316533650158495	0.36001199060669	0.335005201833139	0.224636771037718	0.526694453447274	0.314022957217215	0.549298023347295	0.353822499216623	0.302801752816827	0.54674924855277	0.600322257774143	0.144347068765031	0.484406006738025	0.357934203100296	0.408780351503395	0.268052569274424	0.32696862710103	0.339534237893813	0.489240691445326	0.30967832601134	0.405429511254113	0.321403579915486	0.611099483701835	0.451537153775394
2-Vinylpyridine	-0.532850592699679	-0.432040350271461	-0.418912514544557	-0.45825545149566	-0.480243998993857	-0.476421898757169	-0.433629449387361	-0.481137889323344	-0.460801179917307	-0.457190907335332	-0.38173019500983	-0.455364478471931	-0.440973973941995	-0.476042841496764	-0.498996522175843	-0.389145250973327	0.304272227851178	-0.468253015751792	-0.524135284128481	-0.481568845888941	-0.448294029273752	-0.420240524053535	-0.400349196495061	-0.290465834239592	-0.39558742015692	-0.446419201673239	-0.473068590698438	-0.37692316996482	-0.296765663486386	-0.462665200491228	-0.449339395614996	-0.36740488279364	-0.472949553045314	-0.374850997462422	-0.426646452086374	-0.488325493941057	-0.326455008453426	-0.467082962551658	-0.476907063667329	-0.448488008738866	-0.438415611328215	-0.468661746076778	-0.360859685709238	-0.385312507636963	-0.436865202347876	-0.492300764839987	-0.391278224497193	-0.541191731928036	-0.347836305719612
N-[4,5-dihydroxy-6-(hydroxymethyl)-2-(phenylmethoxy)-2H-3,4,5,6-tetrahydropyra n-3-yl]acetamide	-0.465396422545082	-0.517546474360312	-0.494852651291358	-0.434857403388209	-0.451788981446442	-0.454272453633262	-0.437133011696136	-0.473885095016091	-0.454332624934881	-0.453229815569476	-0.444255054636794	-0.475101342121409	-0.436645538971693	-0.424760930906269	-0.454362512519373	-0.444901348822646	0.359938557269994	-0.478846691807013	-0.427669971258829	-0.477425276767649	-0.42917132145053	-0.456942876470231	-0.496749963980968	-0.445498828789217	-0.439132355424164	-0.437052272263166	-0.429584082062267	-0.515697585764414	-0.410683941398086	-0.400949464655368	-0.422860095496927	-0.589317440267206	-0.403958531231528	-0.438454096659962	-0.485599775410897	-0.538103226167851	-0.336070610336652	-0.443767967903014	-0.374942468726543	-0.514040930708472	-0.434010048815744	-0.424934035352673	-0.371010947062846	-0.488081519883401	-0.454593184331084	-0.388739018399845	-0.449688257437346	-0.517998450805398	-0.52188524436677
5-(6-methyl-7-oxooctyl)furan-2(5H)-one	-0.454875497612102	-0.312066811474624	-0.354082785380761	-0.363775891511271	-0.438321534684633	-0.436503832006382	-0.411347653576404	-0.401426215975081	-0.408989520820426	-0.417897393402843	-0.430191645272461	-0.442780915729566	-0.364615477241447	-0.395464398492439	-0.385446459860987	-0.44690674214819	0.423674554165442	-0.482890627414867	-0.38027523575005	-0.388589795539199	-0.427776901895848	-0.429566726749373	-0.284125080260532	-0.348141410702821	-0.346394887796407	-0.432428447301881	-0.428995886535061	-0.395699502034364	-0.477089828999635	-0.353635248496583	-0.437459117313427	-0.330749899193189	-0.408218399855645	-0.460039363337079	-0.252340381021206	-0.201738853405639	-0.39163844366939	-0.332945688703955	-0.404229850140409	-0.389536026990343	-0.423686306832737	-0.415625574274746	-0.415177593111411	-0.324791232894068	-0.40337171053418	-0.380711122862994	-0.37187198880953	-0.222763641407852	-0.352383016030267
Acetaminophen sulfate ester	0.520222218649641	0.617197768389061	0.57675360540014	0.552367658988145	0.530271755435335	0.518595673326561	0.340585923751741	0.560280266139224	0.573119818277356	0.528280958208448	0.418639075573145	0.535783529158311	0.623488747402602	0.62717043027628	0.561619646018557	0.418666766991927	-0.303098040320741	0.562716157179642	0.574551647473885	0.458620143129344	0.54956064233788	0.421525753477716	0.652973503446108	0.506239466082653	0.614307832926026	0.471572935609489	0.530690061178946	0.532273850538428	0.26966593297128	0.562885693882732	0.468941787453189	0.490397848832721	0.483260762615397	0.442946391282881	0.486281042784419	0.429237150069932	0.230305396736479	0.595163082584071	0.482200003701182	0.409777929811104	0.440540109137319	0.452646416394965	0.332694148580514	0.63008171636715	0.392828208713527	0.583870562295171	0.539813980338241	0.488464025326217	0.321536907894784
1-ethyl-4-(4-methylpiperidyl)-3-nitrohydroquinolin-2-one	0.575961392480425	0.615421764241676	0.662267074793264	0.663977950682745	0.863736007330745	0.861517876300132	0.711275636388319	0.784232183569131	0.860704138918965	0.863378149469653	0.727564281958118	0.890299607916551	0.730999821142706	0.689802560086273	0.825180296388076	0.706193775394445	-0.357490757899327	0.81585787729274	0.770964233449376	0.531498526065814	0.90499943946793	0.584716478065589	0.590881864811706	0.485648606445955	0.780652792813501	0.925422077229739	0.877043877551409	0.844657929815429	0.779541095395643	0.551465064497357	0.941576848633652	0.446546409633089	0.84310760996271	0.830563196096564	0.720179020630884	0.462333064688042	0.436755486404536	0.793347689185392	0.839848901009153	0.694222298819881	0.889938459369757	0.728654324893643	0.528646043926538	0.691502447189382	0.894491073422654	0.789827926165356	0.839333939066538	0.597623164647404	0.682574951401786
Synephrine	0.514202057335376	0.613121093394517	0.63316044731694	0.631968597880685	0.835475849436302	0.832440212029159	0.649756548932485	0.785549583215515	0.829549554787278	0.834461795819212	0.719501063291873	0.830722981293399	0.72008349916101	0.750247440570367	0.806579806019527	0.720420608524002	-0.438372999377448	0.789404386302813	0.789298788191898	0.576295227121094	0.780972862293032	0.584540085522535	0.599484313216875	0.497063629744265	0.709674689418483	0.849950105668922	0.793662619107031	0.76782732771657	0.665866953793018	0.541503471033942	0.832984760687716	0.504403670382333	0.751625229468957	0.785262639380771	0.72084956895561	0.639893755388383	0.352863618646649	0.792523811771855	0.784551506196601	0.707392230699301	0.819131902301842	0.671100465411041	0.429082477218613	0.638560232661509	0.794698639624429	0.806013251280517	0.736254437043786	0.729010525870432	0.668677211414265
NCGC00385237-01_C30H48O4_	0.513771078609158	0.486219247365864	0.510946171885438	0.582121469247642	0.709870437464169	0.723157686327295	0.54091019224412	0.651129225134559	0.719919364486585	0.703916551875078	0.572434218567353	0.66743236033884	0.567315946071705	0.65751821413046	0.717209444456018	0.582865782400511	-0.400986084100944	0.767874471612843	0.73945616210681	0.586243461586585	0.642902921610805	0.623796397016461	0.458292255863038	0.467580323002512	0.538509125725448	0.696218687493714	0.601587146643544	0.613889216720851	0.518105717413164	0.633458706935934	0.681478711718396	0.600219479815551	0.558080949628807	0.748208346245996	0.563859507628119	0.717225811730254	0.246017251972244	0.701144447934747	0.666194275382588	0.817825386033029	0.77462160199879	0.560491905671748	0.286558600121051	0.614801067551905	0.682691558757153	0.64005235706561	0.616559019813891	0.664071485040356	0.581361827309358
(6R,8Z)-6-Hydroxy-3-oxotetradecenoic acid	0.409478424611258	0.65193197032518	0.583668306256873	0.608889438923421	0.654552246028031	0.654291036474011	0.441802029087815	0.629451289718421	0.688623287043443	0.673086149612234	0.629146216889109	0.614200691580025	0.671699415095383	0.691772103070463	0.652869592871826	0.637756649660142	-0.422996309099673	0.602323046656156	0.574616014130899	0.577793529436111	0.584211115854071	0.55617196008619	0.64915434418852	0.585479272172876	0.632603621011027	0.61378383435742	0.484868309990399	0.531346707028982	0.47173602016558	0.526978900143363	0.551538536903514	0.565731985040896	0.427227174322679	0.557379612464881	0.687507738155374	0.589507933757119	0.367062434658299	0.71349000768845	0.620253219897165	0.536185448884192	0.535464875827267	0.377024221958355	0.165135356593116	0.572479823599339	0.492599349748358	0.654168339314753	0.552321538434345	0.682683677025311	0.539591829691849
1-((3-methoxypropyl)amino)-3-methyl-2H-naphtho[1,2,3-de]quinoline-2,7(3H)-dione	0.552897873128479	0.615081662774864	0.62016152590478	0.687812270041167	0.732663773270061	0.729178769116971	0.541047702517469	0.704128120715613	0.747231442628854	0.734307234969121	0.659165343184017	0.703638536054315	0.739415366779488	0.738456967780013	0.804594711863294	0.63582535689787	-0.305984123146952	0.764680908531227	0.715584439101815	0.510159644220341	0.65778817323554	0.512489693915897	0.704166254423748	0.634095915237969	0.726286086174473	0.724765118552638	0.726118162637417	0.642172388439174	0.546896664006769	0.580677086083282	0.707326655632063	0.456516097959348	0.652309110990283	0.672795244909005	0.700573178531864	0.479231694170139	0.208400298693675	0.750387224091682	0.692471506555461	0.709195241191442	0.642212867935224	0.627750284107829	0.398944910108214	0.840763196284837	0.660757843969159	0.797591502627557	0.662853700288001	0.705215506612414	0.590905325903104
xi-7-Hydroxyhexadecanedioic acid	0.43459709417835	0.740074248756956	0.578899580817409	0.535957889568202	0.534020957115307	0.527032300060207	0.308500127463038	0.601976598302395	0.60000331169714	0.574993733041716	0.599047849543311	0.536379337788173	0.729606204281881	0.66814508399321	0.591151570999369	0.622758694304642	-0.446535310210335	0.465895844297774	0.406559964012722	0.536574183494354	0.512497111929014	0.406700278578986	0.817313180447403	0.634955642562592	0.710473730638031	0.485120841808616	0.4215808103213	0.536256965840988	0.345801397787845	0.431117713378473	0.434113158023637	0.616562703806305	0.362364748127386	0.37751011731936	0.740963182514269	0.535032625268142	0.333704613789554	0.73393765572303	0.548864260659998	0.397151909302722	0.394556357132589	0.246473676288499	0.138543013406094	0.638339513245164	0.354145652467891	0.563260342707309	0.582199097074325	0.643314986311975	0.530525720381815
5-[(8aS)-2,5,5,8a-tetramethyl-3-oxo-4a,6,7,8-tetrahydro-4H-naphthalen-1-yl]-3-methylpentanoic acid	0.571306275429117	0.577646453849416	0.590710483560908	0.612458734811663	0.789599937934217	0.785755970902017	0.63113092969729	0.770149610514633	0.773586589844809	0.79837903403093	0.678696803941621	0.807975260063363	0.706882513237334	0.723122897311024	0.791870175528617	0.654022381339157	-0.334347919206237	0.751297863839286	0.726921722824882	0.514870757429962	0.773708343883065	0.533161403121185	0.57739124093185	0.475140902216495	0.724657481061993	0.836937918740308	0.847061195351047	0.744827256808293	0.63490609947863	0.385432974108743	0.851209296093213	0.372666397122526	0.844391247352785	0.66391634582891	0.673171406049666	0.42417675320196	0.328185879970468	0.731689785506612	0.823089559951319	0.635771204178874	0.751977258883666	0.691144371340368	0.557500598304387	0.626867100820933	0.829039008492066	0.737371365484005	0.697498423502238	0.588236123548841	0.611966028662258
Makisteron A	0.564749668306267	0.499588092056655	0.56489501906091	0.495371798109108	0.67531901542821	0.674594628105365	0.566060568512263	0.638332576707047	0.688431815358149	0.686557844614481	0.534150971940393	0.727726571550699	0.626665423251373	0.589529702908395	0.677644943582414	0.539173566877599	-0.407845930187837	0.698790475187807	0.644875661480684	0.616334718320809	0.709799643569946	0.577102229491366	0.490501216321142	0.341899764752417	0.600252024420689	0.740381307631451	0.726257598025719	0.690335307753501	0.609384433878379	0.506908224547348	0.733337300928915	0.436400437637849	0.71738252444319	0.678475667082188	0.552708014543006	0.517679746724579	0.363829900473077	0.650602358654456	0.632114346153003	0.57936850520964	0.745370227707135	0.683284916710232	0.563112707981808	0.543576112044556	0.743340848519109	0.674966944211275	0.656942569178594	0.546305059458655	0.604060037490973
Pregnenolone sulfate	-0.544593478392217	-0.593757045439931	-0.529907371154669	-0.452580915853208	-0.585657526764693	-0.583499639273925	-0.382040443708594	-0.602434071778344	-0.592022537380568	-0.57929914836017	-0.496373642882418	-0.58073922657082	-0.545243299693172	-0.583508309466104	-0.582852304559037	-0.520096215180078	0.427462145664389	-0.571785075473031	-0.568590348763898	-0.557926601441897	-0.511594011930328	-0.469153167150204	-0.621344354277029	-0.364221611133085	-0.565700310144267	-0.538341283000032	-0.533085125911174	-0.557185843319273	-0.29866917137764	-0.568630670268712	-0.524863520178293	-0.613676931911786	-0.514352558701144	-0.496563895443897	-0.635484551302293	-0.610064371772982	-0.211432499849465	-0.587754416658359	-0.560603603735955	-0.608493440160848	-0.542196725274505	-0.488746071721567	-0.412143813950144	-0.449609068466061	-0.548992635488776	-0.585839644544936	-0.502572194441863	-0.692614718785911	-0.54230573716223
FA 18:2+4O	0.551890213247795	0.648186424177223	0.682912230382034	0.647481654956196	0.783881091409692	0.775190577169756	0.618803593011722	0.734952735599209	0.79255498270246	0.784803268540663	0.643829705420055	0.835083355948317	0.712041420739914	0.663701728304492	0.800534397976441	0.636594309482882	-0.361515522800956	0.784688261158028	0.706955253426197	0.674191722169856	0.801709889605824	0.580836826923441	0.703372594751233	0.49106720775888	0.776466407916614	0.815396742869915	0.8109357916853	0.794196066717954	0.646557021346751	0.584736340193036	0.827561553711062	0.561535700394886	0.798399984494376	0.797116729041491	0.746025018146469	0.541283092983441	0.346023750009063	0.750426142674296	0.731523813986035	0.697507849162025	0.762764448635837	0.710664088952066	0.528456835725055	0.744611837550255	0.810141851299892	0.791508930033123	0.780351928049189	0.719074622940743	0.754234006605944
27-Norcholestanehexol	0.427174346160236	0.512026430418132	0.528556936581999	0.553141666088129	0.627665961309075	0.643572536727928	0.515757423023195	0.574273275033791	0.630019725719787	0.632148677259222	0.587457017553109	0.630194589568923	0.557318258349099	0.610232156754785	0.64649977508384	0.601951918812237	-0.465457549375808	0.660968521375157	0.613957410365008	0.525025326026662	0.572349712751665	0.54118135397982	0.469563390165762	0.500028929307697	0.501610171111091	0.637294841244246	0.545312190547542	0.52972476959715	0.524706473540961	0.541146762054037	0.611652442103128	0.567690047255087	0.534778226609906	0.675490290440445	0.573372174178434	0.714073294408331	0.286784093370682	0.674069294588186	0.600284661809833	0.625495619828778	0.660730631268581	0.509709855353185	0.309671691700063	0.540205871866655	0.611221711316611	0.535669184292183	0.523125009624428	0.548881100897661	0.638108937306287
Diethadione	0.454256366026571	0.52687482007851	0.525834158761903	0.486831592912953	0.713355118233152	0.718119522679667	0.510313410910817	0.672197426531094	0.697384915549866	0.693277921323605	0.637279128550783	0.651258737519544	0.561244966144596	0.62668670193405	0.65272615583622	0.649364426148819	-0.449949921056383	0.667444445137345	0.656565489648031	0.482756565371757	0.636922280254675	0.605752660020669	0.485073509001937	0.443424818876038	0.530620058883955	0.677332580656825	0.539878749094261	0.58653340675401	0.519939405773319	0.610443790858875	0.649922628295883	0.606140154263666	0.480371053185259	0.731553615735378	0.61438843631653	0.667595803103405	0.364079246070808	0.690743251869657	0.606214632903034	0.650936395625909	0.709667579746872	0.471356745363142	0.234340096667688	0.503240545263938	0.590179741809411	0.605850754990394	0.605881571085742	0.606313437709671	0.62328750577127
Phytosphingosine acetamide	0.637992119429796	0.461257881897684	0.584215415523155	0.568339231177725	0.610365226656216	0.601785660014395	0.616275787135849	0.564229046274576	0.611200245488717	0.59202679962153	0.438306655681312	0.674704527000222	0.549929130600456	0.540410043135968	0.658261203593163	0.428921845264798	-0.377506250372692	0.6579243281099	0.675711669254119	0.54489522490387	0.696020612130652	0.424423633310535	0.465525405905773	0.290384415899913	0.582141883148711	0.632233089865044	0.804029690046296	0.625805217169645	0.480943972723459	0.554947227747809	0.707301720474134	0.32533278775628	0.812383099853793	0.582238622349158	0.441682540312336	0.403011644175098	0.260021651185251	0.559501687879941	0.63934796006219	0.531505091372867	0.657936181732943	0.767860180021542	0.698602323155642	0.547740171163468	0.68519179446475	0.653817998858313	0.575960568871434	0.513732688350208	0.429937998222006
Leucylglutamate	-0.489467715060235	-0.33037053587987	-0.369841225801875	-0.372055662656446	-0.437945692256557	-0.438103912293616	-0.40742542061118	-0.397702635825565	-0.408131349337837	-0.415235727296839	-0.35068408544609	-0.424164251848241	-0.358345762350662	-0.4123723165688	-0.419771819459123	-0.37006253267608	0.245993162047658	-0.503225112846387	-0.451666221953553	-0.363934890467467	-0.431155992392442	-0.457070218096455	-0.320455344709919	-0.345650769039487	-0.352436715705627	-0.413244396343804	-0.440079350043311	-0.365988955929943	-0.386047030896372	-0.370754459427463	-0.427322189011002	-0.285710086708955	-0.418461541627551	-0.445749281008721	-0.251069289139612	-0.150890342231394	-0.274813773247224	-0.314327684506504	-0.395057839311009	-0.411472733507973	-0.411506966751312	-0.441801282889536	-0.387897132005226	-0.388811224210019	-0.396902290672999	-0.400527205583998	-0.367325921755483	-0.247884180595229	-0.260295433530759
Senecionine	0.583261683229831	0.593092813405784	0.622833392916123	0.57221443179086	0.796320272284102	0.794305347809148	0.645524185261066	0.757364758373829	0.789085915559666	0.807123279879351	0.663373784715423	0.856749975494033	0.693009344176789	0.667069496317832	0.781380762639206	0.635413213638297	-0.341290682427666	0.764424012320451	0.712638053064092	0.558892492573987	0.823931567379295	0.559985459456319	0.57698911348791	0.441104123049247	0.739943764485257	0.864129856392929	0.852413102477998	0.811989355171257	0.688674903553357	0.431523461123512	0.859940768662019	0.47580982170064	0.824371950452876	0.711245612735278	0.662220434912974	0.429443469934976	0.41313608869849	0.716314219437152	0.766885986119616	0.67276641073445	0.806642993022036	0.728736632308504	0.5459848996204	0.615045960529636	0.855934167092747	0.715085345124625	0.757958362759661	0.54731385579543	0.676501135727041
19-hydroxyprostaglandin H2(1-)	0.478331138603715	0.620260060542826	0.595669414764492	0.513285927775032	0.653866080958134	0.64962808047113	0.455471592226623	0.650559358885472	0.677009797059074	0.649025465439317	0.637264659104404	0.674331999628063	0.664978147553382	0.609046113996546	0.630436432823127	0.643344458425409	-0.430654297107112	0.674249896410958	0.581048124109293	0.573915250454163	0.618531776532991	0.495023788883699	0.663428417365259	0.502074112590228	0.661289833191178	0.637618258903422	0.613067304549026	0.660587679683398	0.557324344653094	0.575624763116747	0.615306284500782	0.703782547737918	0.530576073147648	0.704018049809162	0.643217614497662	0.541414519233324	0.279206780484932	0.643137306248028	0.530744894117637	0.705435003935695	0.613480351579548	0.486625308930853	0.344822587903357	0.698953909665559	0.650058506061136	0.571897740898542	0.665513373226284	0.6526514230117	0.657238633216371
13,17,24,25-Tetrahydroxy-16,23-epoxydammaran-3-one	0.540980232539659	0.408907120348172	0.411754013069886	0.48769736795892	0.621378022346269	0.631390523208104	0.438727301885934	0.589079308312789	0.615156347633457	0.60901027692069	0.533183342133483	0.572505714665239	0.467153556727467	0.573815295347203	0.582157808046941	0.564662407241841	-0.447377637750737	0.648224985859762	0.626771000709822	0.572787635127319	0.527868690419061	0.571031361171769	0.320564070397899	0.403546317784446	0.408670529414523	0.597189587651003	0.49983280154686	0.4746796172447	0.470548375385204	0.477728246435771	0.579529558422655	0.516545768271513	0.466931304884907	0.61945605549452	0.468057019787794	0.701693180583242	0.265666911580386	0.617180092564611	0.602053312366937	0.66718461276328	0.648699953316176	0.465684039637468	0.232822133601376	0.470108469616804	0.593679735246427	0.500875565271577	0.499469225797477	0.559946535525108	0.493679629988974
Chenodeoxycholic acid sulfate	-0.383423054394136	-0.514545388705465	-0.422237426396196	-0.373199519567639	-0.435720650406587	-0.435905121550171	-0.471697898417866	-0.449587385200821	-0.433112763508608	-0.434075096058912	-0.513407821974076	-0.467276167518798	-0.455693106952579	-0.473820364325802	-0.410515807810924	-0.496480194746023	0.359497226352498	-0.423370415728966	-0.359320729500403	-0.410955010638398	-0.405885139758071	-0.377995971771332	-0.499365137502447	-0.445587816622065	-0.434780516305992	-0.426443439744149	-0.409420985086329	-0.472596943007286	-0.445641782099125	-0.450700316819933	-0.399114684556147	-0.531640107720644	-0.349610605878586	-0.434995095196235	-0.507633499650325	-0.480044065816728	-0.407281888284232	-0.442988884581199	-0.384079598288438	-0.462239801509721	-0.38678426956947	-0.377574604475967	-0.382967334209176	-0.405680380278752	-0.424292506879406	-0.334698915640473	-0.426418518035166	-0.480090221228067	-0.557521133768691
5α-Pregnan-3β,20β-diol 20-sulfate	0.373869626520682	0.657396287414112	0.619736988453592	0.426598764590506	0.357916906765723	0.363223934598862	0.150200822805293	0.404265256255966	0.402163971807101	0.3700849801172	0.229598429469262	0.407434317966924	0.377632639088382	0.440561869897777	0.269729377045734	0.245207166539651	-0.40885765766345	0.358609522015957	0.310173955758204	0.419325258095855	0.422986545096679	0.489707020636897	0.562771992355023	0.456279038264754	0.454504274546301	0.284052637600505	0.179281171386972	0.434023950371295	0.126409608378761	0.332132213737293	0.202939896825261	0.714450791946852	0.175817736249698	0.273200190193942	0.356221007975388	0.453080375858469	0.534906578463034	0.341016027701043	0.266316340262246	0.304397659800995	0.276120435188052	0.171519184708962	0.0402363287305014	0.271035025768713	0.188380390915339	0.3917557721785	0.376455230738518	0.378416401431342	0.252615548973621
Thermozymocidin	0.531341954716845	0.321544868644563	0.440734655623741	0.413713595552706	0.358106818899976	0.341665021011018	0.51564959157277	0.336906313694277	0.348181463681008	0.309922415127705	0.221072157267246	0.406120738298169	0.333336982555663	0.367170320387365	0.469877909705518	0.219166620420657	-0.39430609928113	0.433152505627763	0.540466453874334	0.610997945452732	0.384082423627249	0.258529504338693	0.363638003266026	0.153087158064216	0.347446082604746	0.316754874142898	0.580163242307038	0.367308066726642	0.233346796429655	0.62676162011788	0.412619473937481	0.321378221919693	0.647825483844013	0.397873091335159	0.22206025802124	0.446898855312939	0.0964591690902044	0.320387487948546	0.382508036028818	0.382505490645747	0.395540213691463	0.710295859800795	0.761510841232936	0.374375820444479	0.423365051227901	0.467783036112626	0.317516624688474	0.399035954282463	0.347748214094769
Polyporusterone D	0.526693325929791	0.550924649630824	0.52884352386584	0.498108353139752	0.684325815320533	0.692519227663131	0.592971653523599	0.692131558163603	0.684531372409458	0.684696587307371	0.594728139730943	0.699772094382063	0.59997174169883	0.664743023623995	0.695398436603569	0.600800111239021	-0.435127467104517	0.708119894208795	0.664319808948712	0.580524772909034	0.631010036652312	0.549387719465647	0.52665299456827	0.443002459866697	0.570882089195039	0.70786082029655	0.616666354604389	0.641815384889213	0.520043802827077	0.535084923069785	0.679577886163093	0.65335904636873	0.586793351964173	0.738607753221162	0.636843018831014	0.698387058562061	0.275683480746829	0.685674166365263	0.67841466199854	0.830556323481645	0.747855846703586	0.578641044905832	0.34856859238676	0.55867767029576	0.765857014840973	0.643226475677288	0.66847720586126	0.656412048757503	0.692615152040771
Phenylalanylleucine	-0.499916733415308	-0.346613762887232	-0.400257755230189	-0.418221351894674	-0.433597222121774	-0.426800984334516	-0.466991257544216	-0.384829301907881	-0.410155633173775	-0.412302975398846	-0.390428744832224	-0.436357462870488	-0.398457354816684	-0.39028239733326	-0.447065693859381	-0.389327614836516	0.343696292597375	-0.460933825277819	-0.429349744897914	-0.413221945194943	-0.397073910027478	-0.409915338507604	-0.341514824428763	-0.330028534271742	-0.367493489269635	-0.425906674739621	-0.440918537956827	-0.366762471893609	-0.408958854632092	-0.394735824096386	-0.422822915975267	-0.308167636804599	-0.439989339296377	-0.445654172958456	-0.354687275817578	-0.334107936237157	-0.360794344976405	-0.348313600023381	-0.392639725189063	-0.44341818307284	-0.420444632897504	-0.42247393425954	-0.384199492691732	-0.418322214230624	-0.442248035899343	-0.440693488689283	-0.386836500271697	-0.384316773144717	-0.389071958860553
Hydroxysuberic acid	0.372139948803785	0.560832291734768	0.522653064642355	0.49310088614617	0.555110577209178	0.547653982571959	0.29863165450243	0.555031126062792	0.557120052056207	0.544603277425414	0.458870484042497	0.470868358691771	0.52904882482198	0.622398025886584	0.559295452281202	0.465566870332039	-0.426071488303185	0.492850228058309	0.585170678421766	0.467391090022193	0.431940712585654	0.486810578864383	0.541516094355252	0.476495194817699	0.485563812286715	0.440154228680558	0.392584582801783	0.378746922851478	0.238607380244518	0.528752864691146	0.406123413609461	0.513559782821756	0.384516715512755	0.427845780126412	0.49793070863244	0.572814175675851	0.272359180876252	0.527355813412281	0.435016379581678	0.43442320709839	0.393725946482486	0.392785380025743	0.217026518501796	0.455114103485807	0.342684037261634	0.59369954379574	0.334966731907335	0.597636154690831	0.364672549134986
β-D-Fucose	0.523539002100354	0.546556173301267	0.641674734086267	0.645659879126491	0.779561750571572	0.772904348420659	0.671644796534048	0.678152585853874	0.762601957744596	0.770099128913954	0.61971220341498	0.81275993845907	0.643576464809377	0.59925045366273	0.74744614752249	0.588001842241807	-0.36914215171894	0.74436345286236	0.765859285121205	0.446474722341349	0.811398516357121	0.592811328147718	0.521286850933793	0.434067793183433	0.692119803918093	0.816857164846782	0.84415806166618	0.762552994168292	0.694852102761449	0.485095001577496	0.841011813150507	0.372854180571314	0.84406513118464	0.757371611902786	0.612795177483543	0.440354834959977	0.44556381599631	0.656458976486405	0.699337115549784	0.651561719090197	0.794096866482685	0.749353186164046	0.614624888693175	0.648240884214944	0.845854361184381	0.728180875205876	0.684913983440047	0.547104603548507	0.589681909641893
Reserpic acid	0.55476338135103	0.595248354924017	0.620731803652855	0.614748443205771	0.848023205155169	0.847675553796639	0.680631260985108	0.794673872414516	0.827382250576388	0.855208700321747	0.722717769943822	0.883186249279931	0.716617846171029	0.673188264431988	0.800609915069378	0.7035045111736	-0.337152044209073	0.785901362335767	0.729555383687407	0.512301766422679	0.864516723990204	0.574088637372315	0.584982368576545	0.465361932177163	0.761236820807121	0.917002964632826	0.858121504354441	0.855487020189123	0.75006696431557	0.44184339345076	0.915817959810593	0.442897915816556	0.819075303141492	0.788941185230913	0.729663402901612	0.45310633363222	0.409655379968182	0.783766559415474	0.836597450238249	0.695682308567959	0.875046816275156	0.716904027193795	0.479339948642813	0.65717986148618	0.893453776695838	0.7660717250766	0.830818148157079	0.570401428909792	0.710475424976764
Ginsenoside Rh2	0.459790245317393	0.516789639707651	0.532963612930904	0.420935367945182	0.513540239327945	0.513967632617773	0.400616932079717	0.513274515472791	0.499509846470118	0.518875518914368	0.394846392320804	0.557332754150035	0.433317156075821	0.464184162746367	0.452050339511214	0.398673172384493	-0.459775659383961	0.501353354938804	0.420098428947535	0.586559617720438	0.540267501540297	0.513458608235956	0.484434233254008	0.35665367187742	0.469336364133782	0.507194767442699	0.42319847387237	0.531856727191497	0.336483658929079	0.38411993466614	0.466078127063564	0.560935270053216	0.436412193604388	0.460672313968315	0.5327045967758	0.472687739317207	0.414792915095902	0.473551045771472	0.497346189116113	0.466757695572801	0.512379618469826	0.414263525637791	0.245309338610777	0.380273916686165	0.472032200354133	0.49889336490846	0.522684212708584	0.462582383189868	0.487345778290036
9,10-DiHODE	0.492507605141111	0.489718223600957	0.487642034703531	0.480518351923846	0.616433426787486	0.608827694691271	0.567284284525824	0.547211811076651	0.608665123261128	0.594987423056948	0.487023610622145	0.67468286175474	0.555487558165554	0.531634329898084	0.632103222130075	0.46790494864042	-0.342375404362807	0.639620693348169	0.640982955977378	0.575353922824181	0.628327127970137	0.43733845137976	0.482235641917504	0.302328307873355	0.556388651680835	0.643124611744173	0.724006235690473	0.559702592947942	0.499363100464162	0.621542130523774	0.665460493004723	0.446998607514314	0.71297036648498	0.653497733226009	0.479964443080582	0.438822626297473	0.210989593013723	0.557229169252491	0.583122328011007	0.588918178946089	0.631088777043849	0.720110501560372	0.649637784020406	0.533514060234631	0.708740318760216	0.603782080249947	0.548531383017717	0.487713115388558	0.546766390983394
(10E,13E)-Nonadeca-10,13-Dienoylcarnitine	0.348156849512298	0.34146495281916	0.370875444929512	0.272597973372716	0.331982689480822	0.335123908471035	0.378449326966983	0.377721047528519	0.281737708637421	0.319927498173421	0.460114134877427	0.316303560202629	0.305854245472774	0.298997205296148	0.265700345246744	0.50548573499322	-0.581218850133449	0.295179592264546	0.254980213245978	0.445401423497992	0.221692212425131	0.284117413837465	0.314396966204353	0.306452781159554	0.221276571698872	0.297667135887244	0.212342499499827	0.312347271876941	0.382664485719174	0.278825758368271	0.241845425681131	0.496247162511774	0.21394057813695	0.339139932826103	0.418038330238134	0.569173351005575	0.357508905772598	0.307081272101205	0.235758141850947	0.348582204608724	0.272342894831823	0.209690416301897	0.20507859007233	0.22141718998549	0.270973934826181	0.262605960403709	0.325614572991053	0.392712472024279	0.53165960778049
2,2,6,6-Tetramethyl-5-hydroxy-4-(α-isopropyl-2,4,6-trihydroxy-3-isobutyrylbenzyl)-4-cyclohexene-1,3-dione	0.40563301631479	0.635725857343293	0.620642690948224	0.553350762194766	0.517400454992038	0.517482797179332	0.283467383513679	0.52739909896261	0.558363272531663	0.536687739735757	0.383418278478288	0.526895359511918	0.524365399179575	0.605414845831516	0.491489906792509	0.374148679913759	-0.453984512171746	0.482834615799174	0.45674414918014	0.425356618016337	0.573579199485308	0.525286005971823	0.560113803114014	0.501170380341265	0.552738260962335	0.459003155025219	0.388687895311141	0.482910370691962	0.270900844780703	0.374860894065976	0.403817796089089	0.584304662143676	0.363403515036526	0.401045651541383	0.444843448885519	0.360762975264522	0.458699282784476	0.484097099932271	0.451742885418656	0.407147393940254	0.42486424204105	0.293873926614586	0.126153820457882	0.393235502915193	0.368405939322588	0.493891676364767	0.455974863799432	0.509896084316128	0.263164343973283
Dehydro-P-Cymene	0.603126711924577	0.596651331701411	0.68936722858306	0.686545387015186	0.792997729076625	0.789494127688901	0.61816077932791	0.729292446992887	0.797300495479279	0.789673390526432	0.603490423149873	0.829689026766661	0.683369472666033	0.649306748945381	0.771196843618113	0.58591966690604	-0.296824066710261	0.761763293972558	0.751994033221934	0.530120983818533	0.878879357851251	0.559164013858714	0.573677584402176	0.431008998154716	0.746875858443348	0.833172715298645	0.859401713996188	0.775998787733465	0.651769660934867	0.501441458117538	0.867968739211796	0.375187981905291	0.843563304041967	0.728889957400272	0.629434166359984	0.41151016343545	0.422935232944414	0.712367710920524	0.761640118016449	0.611181099199429	0.796568539614923	0.711042375334087	0.542868721898439	0.663507939565126	0.819964619046675	0.75453550487307	0.745115899977694	0.609348662558934	0.530122923176827
Ethylglucuronide	0.487195528921867	0.58820116930571	0.621451710211751	0.591437233233487	0.753497305972246	0.751231228191614	0.666781647441233	0.692538975354254	0.744342147443352	0.746843274179963	0.658641138031645	0.784071364404723	0.624267046141411	0.615371264971589	0.732553327031404	0.636420118409435	-0.41620548648721	0.735611657886302	0.707975784375603	0.514778408503706	0.732898787614157	0.530567304304782	0.583034213107554	0.440421617346098	0.670138540028063	0.78577127655371	0.751387540253787	0.735485813330125	0.671338129541099	0.567262099940642	0.778896616979761	0.62200938375617	0.732077459506389	0.784064336377302	0.691708199525817	0.550399191297122	0.364637961193682	0.655127087059329	0.658898013360836	0.846733843908469	0.753121886313147	0.676251712797353	0.516037469038574	0.645053728083908	0.889759925459914	0.664377479490031	0.687528360775529	0.690465412961235	0.731522288259355
3-adamantanyl-7,9-dimethyl-1-benzyl-5,7,9-trihydro-4H-1,2,4-triazino[4,3-h]pur ine-6,8-dione	0.402305510569402	0.406797020872452	0.459059830626148	0.315722609511996	0.216807388266942	0.204162375381873	0.265118225489927	0.229531809616362	0.214732285485593	0.179491866662606	0.0236870703368887	0.283307183645821	0.193814031177217	0.295309822847007	0.207336665978568	0.0407978401026957	-0.391613363105733	0.277227627786743	0.361153006977266	0.456234460673843	0.253465564652492	0.394790051064658	0.367269288383796	0.197732790271364	0.252112080165344	0.120045353365298	0.242432827285697	0.25926285021308	-0.0120023390975435	0.424127407091461	0.119651267361758	0.543239723306755	0.299706817509131	0.230175995759748	0.103204875770276	0.421616118782295	0.356681198786394	0.119516009866165	0.115459036023076	0.252666804180104	0.17863322685504	0.419708701283858	0.421823967457726	0.144402379315475	0.155770455792576	0.318778277305667	0.176592046471132	0.291200424119767	0.183545493413981
10,20-Dihydroxyeicosanoic acid	0.423348773201255	0.671377911853923	0.549677666060578	0.391713455501066	0.507090427259247	0.502140856931914	0.317902630711002	0.616753846762641	0.521382118918864	0.535378432029733	0.536357108543406	0.526951454163222	0.618574857964299	0.596002392895671	0.50519381626662	0.545114563772674	-0.431290554112136	0.443977059653921	0.362294490707347	0.526523495640587	0.449910486508519	0.395971420859789	0.730588001724006	0.541186765149509	0.612700287826309	0.469252285683948	0.379415093040078	0.578803795181988	0.330290486169713	0.304638658865362	0.396085690839478	0.641646915458916	0.325201306274718	0.401769499894814	0.656922362360194	0.460813400063401	0.330546419697456	0.548669448741143	0.47576245317298	0.470642712244859	0.368970577229451	0.277450423304902	0.128268546859126	0.523139212159423	0.392656422452813	0.528145706832516	0.541980261609699	0.569282066155578	0.56242336863579
Fructosyl-lysine	0.516861601565185	0.410219732265996	0.421492210534354	0.345157967990585	0.415340107325499	0.402368437357224	0.336745030881954	0.422306119590612	0.389428542508657	0.378560655264333	0.225707121445508	0.436641261262317	0.34856190740051	0.495186904376061	0.434238129126389	0.244213170150107	-0.39994049847136	0.451805954333818	0.510308280979052	0.553216646950036	0.342485802487717	0.49639465251276	0.405710944883405	0.222599641303688	0.332429254404978	0.355178657226195	0.392756338276906	0.342028408130555	0.0954131467199646	0.490845630842095	0.313123463148989	0.50202306012489	0.400761209562814	0.40676475614939	0.336016288302554	0.571037942256916	0.239700073388936	0.361599475432619	0.364482598221512	0.480205011080801	0.360176026217747	0.520520858926527	0.354280377521712	0.298467577435863	0.361403860817806	0.547965627586464	0.276042539771737	0.528039108264296	0.381108445669625
Glutaminylleucine	-0.41295096767459	-0.404350118030174	-0.430313169224322	-0.419626640787123	-0.415678317008524	-0.413123027413483	-0.415015476921209	-0.399183509609313	-0.405302000899583	-0.405488328883473	-0.409143377333169	-0.425481974412136	-0.391105675409376	-0.396492153365965	-0.411335463654177	-0.415072980413604	0.572434603504201	-0.454504585534131	-0.323736094948792	-0.434754699422104	-0.402454344448487	-0.447789259502686	-0.395382113536614	-0.419985714423768	-0.393543432245018	-0.39551945673528	-0.381720345478943	-0.415046909429318	-0.405730097783531	-0.35363028089205	-0.380256823137493	-0.449551289646954	-0.367617192591304	-0.472475886111805	-0.3651578143609	-0.3338525200016	-0.367829110485386	-0.336520383220909	-0.355276084872578	-0.472683414966837	-0.386812328767861	-0.374899028365884	-0.317761793448481	-0.463621511087252	-0.406240127002876	-0.404198836191463	-0.41123679444389	-0.355378356699142	-0.447976704199142
Diethyltoluamide	0.286499080436888	0.314638211122643	0.43247249611617	0.508428674174824	0.427790898382818	0.430383424096746	0.646742178521359	0.354952892717171	0.405708925460385	0.41810097685316	0.545497492787806	0.399456780017769	0.383951489615224	0.292508936232207	0.404612078859484	0.515019806098439	-0.406685979527971	0.430941156765134	0.354814838373752	0.403674959761568	0.406589674543782	0.353708081235605	0.255917290306593	0.536680478399017	0.322394343651986	0.444820073793718	0.36995469077208	0.354032328823196	0.717026026340262	0.319528903958283	0.452663306086121	0.286769238687697	0.343612852679911	0.58444835648558	0.36613044551266	0.399655555065758	0.474948722436081	0.35138708353071	0.346997052942412	0.395575873237022	0.446470332077997	0.321069072958924	0.355312790934344	0.449965118556718	0.417041588017657	0.284839639619328	0.429277867013935	0.273708574937244	0.538774808023894
Isoleucylleucine	-0.477433045531656	-0.378641706631572	-0.418840193235856	-0.454096944296678	-0.419624170165017	-0.413278481766893	-0.420861122467072	-0.395898477472826	-0.403841356933021	-0.405291117619295	-0.393788137319832	-0.41411292336461	-0.40463430230789	-0.386772494031766	-0.427054354027511	-0.391371792264164	0.411361546633099	-0.433734928863514	-0.379067530360628	-0.411066242664233	-0.391866160009034	-0.408953892960343	-0.366451540433433	-0.36552203840164	-0.375333000892684	-0.401492554747922	-0.405583729007347	-0.364519115960704	-0.381083287274836	-0.364992638094491	-0.391581104886063	-0.337322408106052	-0.406189916455346	-0.398575942288985	-0.366163047678867	-0.354111072438081	-0.399553744187234	-0.359623791372537	-0.382727463361144	-0.413067088569021	-0.384967741160114	-0.385272914882395	-0.342504622368601	-0.410227028106216	-0.399444177439289	-0.434083929884077	-0.377395624869009	-0.384532425723978	-0.37804164413808
6,10,14-Trimethyl-5,9,13-pentadecatrien-2-one	0.508628407786493	0.598068887353004	0.595491432329017	0.539891661671664	0.572846225084045	0.571327694949186	0.507965653192639	0.624988924476939	0.580788243622565	0.579300022641763	0.499200524438585	0.609479606422191	0.557118058627468	0.547664278018695	0.578515239344583	0.478358035744775	-0.301641582403166	0.570546085532338	0.489046593810476	0.605280249343687	0.588500257393521	0.522582336409557	0.574798499193632	0.519862977510898	0.602618005998594	0.579935560927589	0.511667315863281	0.617536896174644	0.473168032931621	0.339646917272341	0.573292268015954	0.542457373554638	0.494015476423638	0.598346726554031	0.577513530749454	0.493696213897076	0.449793280440082	0.556782484121333	0.588409368938775	0.582517756099413	0.574753964742846	0.436170710749364	0.289890504648671	0.553954759441066	0.562310290262813	0.631715735263456	0.631660063100496	0.562752439818578	0.615149247723979
Tropic acid	0.578785613855737	0.303172089049225	0.39877675513632	0.431489989391213	0.391076138168226	0.39626053837459	0.427781466582043	0.373646161481012	0.369113481801003	0.350644707954301	0.211436662863439	0.414893400597306	0.250614303034407	0.380449293895636	0.443564325511137	0.213630313146226	-0.289936785379826	0.453310351053325	0.510326558230263	0.542705586646417	0.414752108691331	0.537002042187369	0.293508994903016	0.137716808954631	0.293737278897629	0.366140315019533	0.484175750851506	0.371519403475593	0.219942847575619	0.574409371071607	0.440125342393462	0.349176995352508	0.537886669462685	0.433420796837084	0.230933788680272	0.509798417700819	0.299984537969237	0.331840459229966	0.389572501249754	0.46008120866188	0.469416665262994	0.603944448790193	0.568181776639693	0.283779332114355	0.441114409949149	0.44086976079617	0.334371735595274	0.440520877607026	0.367833181014258
Capsaicin	0.531455800977635	0.339993760050204	0.435053533237103	0.389104246650808	0.438810740857809	0.420882571299813	0.605257273929696	0.410273734082688	0.414470536192454	0.395026118909687	0.306057521225701	0.528667853007796	0.375654978055415	0.377422479556444	0.508329280467846	0.296155706520607	-0.358145907278115	0.479766531579205	0.527769537308353	0.702605071264088	0.491770631267219	0.288880905788806	0.378777988175973	0.134211307715641	0.425801098152272	0.452702924576873	0.693659440131697	0.495961192263028	0.381666751928774	0.539644655353401	0.54881442308945	0.312260426282897	0.75053378840043	0.49337852933618	0.305298969985837	0.396533767570658	0.174020330511926	0.390636867652175	0.496577175418703	0.419993729837965	0.521362767067854	0.778381158359981	0.839119980139281	0.379631111125724	0.577293184119841	0.493813169143553	0.452357655355985	0.360676682054036	0.507682601461271
Leucyl-Isoleucine	-0.464638525805278	-0.383058869836381	-0.423955517467308	-0.456238372498749	-0.391852144171846	-0.386901533885408	-0.405567000784602	-0.377192850875997	-0.381197321767881	-0.376350742836255	-0.374184968990397	-0.387558021234433	-0.37722557574955	-0.359750879031289	-0.401692404088766	-0.373146409563658	0.387604314783348	-0.417406112833993	-0.358758780000957	-0.423435721401629	-0.365900545707786	-0.402720761346291	-0.371634216670095	-0.382061976150869	-0.36422106023532	-0.36640626154094	-0.377317893245301	-0.347333517052397	-0.36774690133486	-0.364928791477942	-0.362354690544945	-0.361552201432204	-0.379898393069673	-0.3964277239464	-0.347547065156158	-0.374291683185484	-0.400031636377761	-0.33391464662994	-0.347972205219338	-0.425141052915752	-0.359399966533751	-0.374711455479413	-0.335742666102836	-0.43183290490369	-0.380200652035027	-0.411762744755681	-0.359241012581494	-0.400500655237332	-0.380803767708927
Maltitol	-0.468135780770003	-0.46728574785227	-0.470410933199475	-0.41637646496045	-0.423887521865764	-0.42308186186502	-0.351353052885547	-0.45160443916403	-0.424314286408615	-0.411573939379413	-0.3492994001641	-0.395993857103594	-0.404036877079382	-0.442993134625673	-0.454573804512791	-0.359684042258791	0.425622567096866	-0.407788559433515	-0.459371065849793	-0.500526161468531	-0.381326209141636	-0.455130570888213	-0.446828993714075	-0.3270580656334	-0.371061902256561	-0.349064641308952	-0.388435283008022	-0.368836706355796	-0.220674989152249	-0.432423522831436	-0.361836240041877	-0.512140345276097	-0.402870174687893	-0.37934321627887	-0.460326568887325	-0.594898867079763	-0.240820434607682	-0.406734289043091	-0.33800489826431	-0.466645432398441	-0.378786627908747	-0.374837416771756	-0.372607931759837	-0.380520525497933	-0.379772224693916	-0.379312233180402	-0.320761043470665	-0.583302858117682	-0.399928255589268
Bisdemethoxycurcumin	-0.400343934653784	-0.426000504814118	-0.437400396576532	-0.399567161528509	-0.384663696604663	-0.381975287874899	-0.390459763603843	-0.392068746270092	-0.387346751812832	-0.381184432597654	-0.411259664967128	-0.349759644163523	-0.396883495052399	-0.406785088253734	-0.378305938678539	-0.431510227475191	0.753682018460332	-0.373116788187772	-0.346954558458875	-0.373553295144345	-0.372023463418762	-0.346375683556228	-0.355976175780779	-0.442626823375697	-0.338570877957905	-0.328097002670037	-0.343392478589557	-0.348927167136283	-0.352563896868102	-0.353420614399346	-0.340511563850872	-0.318305311370778	-0.354189586443836	-0.365048500652823	-0.394591980396929	-0.507725407300881	-0.345959988964198	-0.351595320494892	-0.326143483414775	-0.294179514873899	-0.338935225050921	-0.283287262272157	-0.345960846602477	-0.377187294623815	-0.287860206675825	-0.332894924118686	-0.341142628689249	-0.410462435755712	-0.318944684038461
9-(2,3-dihydroxypropoxy)-9-oxononanoic acid	0.58268527930153	0.558905583757385	0.640512508921053	0.648171236618664	0.797443105083921	0.791789676979991	0.708003718964288	0.739424099958785	0.787908105686684	0.792448110841649	0.654974028528979	0.841728983131918	0.670444800518596	0.633537844174787	0.791839997963267	0.637007444825663	-0.331146097350435	0.767246272704334	0.739142068312749	0.540396131993175	0.851336002731147	0.506004589865993	0.559711025976603	0.404564413844628	0.729953556101818	0.851316445166887	0.896703406124199	0.801249806349274	0.70915610708313	0.51976140902248	0.898336473358958	0.405882837796301	0.87106754080805	0.771109741507105	0.651932381125253	0.43186797918875	0.342666637695405	0.734088373267316	0.790410571121241	0.662174502221741	0.850316638157671	0.761077602861316	0.601976940312465	0.651367503236234	0.866597502257854	0.757489056729953	0.796277840059972	0.609348673099884	0.64380405236486
Ceanothic acid	0.438957000039817	0.333644533258441	0.361563965774193	0.45670368182105	0.507924880871549	0.512863751496556	0.431003806247255	0.452385579693162	0.497783356031436	0.481672077163745	0.392485740079191	0.451736668268895	0.324362713843045	0.482086828330569	0.525882782863463	0.405917236845324	-0.423249931725909	0.601643001229846	0.61427688434168	0.52258239321966	0.424831710455381	0.573843541113735	0.261838891407088	0.335984115415026	0.292715939144949	0.445041259124169	0.410724933908828	0.367417597302296	0.320618899811264	0.585210467817905	0.455639346007945	0.555932712810853	0.400541296926682	0.599187656925857	0.358210273010684	0.702269099618197	0.191602475750864	0.490846125940471	0.449852165755189	0.657206962138191	0.605038536223077	0.454285139329546	0.294420557362319	0.389559357153866	0.488835400634915	0.414938162751816	0.369744695987981	0.513704754838292	0.443530762630148
17-Hydroxyandrostane-3-glucuronide	0.447899992521228	0.546786593970665	0.546487198280385	0.4581850886595	0.540377293100533	0.534795795658926	0.576098296159108	0.511454843012853	0.557142638072632	0.545937109034408	0.574675379326489	0.618218352691905	0.552941559059031	0.474747492057153	0.521216575993549	0.558623681539759	-0.470902203856508	0.539441253847875	0.448611325539558	0.56651538388743	0.552511861827299	0.36190705407288	0.523211113911492	0.448207650214539	0.560042988236039	0.579640561231394	0.521616751418376	0.593726455031155	0.601033322328187	0.467403143090329	0.549370104444467	0.615964377500756	0.475903696876089	0.609959408195305	0.581006130268055	0.536859030222621	0.452711576411288	0.525890237498659	0.482926030894225	0.589307643629818	0.546351719257937	0.439734385822422	0.391353650666599	0.508965833915986	0.60854973613798	0.479180786839809	0.570142015312396	0.548012861542971	0.689658835690129
[(4R,5S,6R,6aS,7R,10aR,11bR)-5-Acetoxy-6-hydroxy-10a-methoxy-4,7,11b-trimethyl-9-oxo-1,2,3,4,4a,5,6,6a,7,9,10a,11,11a,11b-tetradecahydrophenanthro[3,2-b]furan-4-yl]methyl acetate	0.585581858747443	0.489499122532254	0.531761858080367	0.493552328840156	0.654455758595777	0.647485495778216	0.600664166005007	0.656021643401654	0.654808094786092	0.650364232580049	0.551289789258376	0.712743654350881	0.619221939220386	0.573897700028979	0.665747220547919	0.558009343011575	-0.432828972746666	0.631475624193291	0.647257274349246	0.605298453450911	0.699805743736992	0.430774007746321	0.526557876901244	0.345970079963097	0.632127786809432	0.703948685874932	0.736350055408167	0.689496450319034	0.590025008166743	0.450043880859532	0.725777329663337	0.380544411614283	0.729846968170788	0.632419037882782	0.551576186538289	0.455152032446334	0.34913343753746	0.671777863799479	0.687889345466367	0.540037022881915	0.704558533489771	0.654970806543085	0.52590370952948	0.526944518827413	0.688883563852993	0.673978793506913	0.727507183230885	0.478802133791898	0.60510949764357
Bestatin	0.364244223794476	0.655756242130978	0.57928570290454	0.48992396407014	0.467702167877276	0.46402299781118	0.239509172868959	0.513097805407443	0.506645499344795	0.48334830549904	0.41898041925945	0.462006462963671	0.554421996594145	0.553263618339146	0.445950850407637	0.445599522033236	-0.390545135568601	0.401495340072089	0.396577265956251	0.530084181295672	0.426634752667596	0.487567613305265	0.642836370522683	0.531909568982945	0.550144898602028	0.376464855844742	0.286069435076432	0.413962070366691	0.223072263543305	0.350011972998796	0.304652275708408	0.660469495219617	0.242272410259626	0.369899961986809	0.551705934937561	0.555019973300106	0.407351800941572	0.503327167256312	0.357309258616725	0.420089923518988	0.318201015369148	0.183632515578189	0.0451361926205504	0.480224511042653	0.286882070004919	0.461550767775418	0.427715466543344	0.602472815055467	0.39808598392779
Butyryl-n-trihexylcitrate	0.466325065518616	0.349982635712951	0.426542311726292	0.358770456319894	0.376666285508336	0.367019640718818	0.618436468138574	0.346524634299799	0.366520296889794	0.349453225620693	0.349509873888776	0.469722425395365	0.364684856080842	0.329384255132877	0.442537826148912	0.347501939109983	-0.393863983748881	0.464471368226537	0.457749019767	0.504691257955167	0.427661271006758	0.271787416500679	0.350944715870674	0.231501325639634	0.368869975112033	0.39171204310017	0.569221962170268	0.42609705310242	0.401011508653544	0.634509201752357	0.477334521620291	0.396842778445227	0.601587419017266	0.501429600765666	0.32950389277282	0.499368985275526	0.208975528627308	0.368241131999534	0.38508965051573	0.404671328608743	0.448314428793883	0.677849230289706	0.733673295445004	0.417264522527244	0.469591602527438	0.423006258656529	0.403635734068519	0.361135496822588	0.524655085818796
Matrine	0.503070240629955	0.588771966588521	0.612289532535854	0.603335035003269	0.723402050665003	0.718999234272045	0.648691998150107	0.682277166063631	0.738952146042375	0.736308445051006	0.634740405875425	0.808052491062244	0.687677101972342	0.602013397587953	0.715369061750735	0.610724866937058	-0.277807836720474	0.698250305509034	0.628029494388393	0.534083052238296	0.789967351427791	0.521142750611613	0.63563203562597	0.460439397107808	0.759053754564721	0.794335414109683	0.787175606875756	0.830168199070574	0.696804447203857	0.497032859369746	0.796853857434875	0.514173310198096	0.728473548186937	0.719216976490657	0.642905126810817	0.40832599887274	0.403908362455446	0.757837414792867	0.739077892856909	0.618875701119033	0.785612092606438	0.693151963405374	0.470669773588145	0.677833524382775	0.767243883329974	0.700041618367665	0.828432671008345	0.488947840884416	0.699086263311991
3-Hydroxypicolinic acid	0.552755788208178	0.522607746483029	0.579479349809335	0.572084008073163	0.72810693473192	0.729773557150396	0.581980017934531	0.645999188295626	0.733819115501901	0.717403865376715	0.592132523147937	0.742724981414453	0.60710212897932	0.644410187140249	0.701034373479945	0.585932461722453	-0.368414145307374	0.749545122688527	0.716240345007455	0.471442772184796	0.751202037789221	0.561885389785733	0.471617068745005	0.435819632932017	0.589311629946015	0.767087612455904	0.674930343246348	0.633741052864323	0.617886910032422	0.683239169320311	0.735729733545839	0.487802036210325	0.630031058918516	0.734884605814102	0.569878044300812	0.520432944286174	0.396983358602518	0.670776775913362	0.640450405875862	0.621386373891008	0.715920121064313	0.614899630897287	0.387942481517284	0.581484181619791	0.693135137087957	0.689740770035762	0.636874486719251	0.554767223669407	0.541981253676254
Sedanonic acid	0.406291562513682	0.668676754491334	0.731065577504242	0.567464534731329	0.56855964244349	0.569025493418154	0.3272612205194	0.54920285708181	0.599342922249187	0.580945628815632	0.383025063402491	0.625159874484163	0.530356850233381	0.556813541071593	0.501881360370033	0.374475578150066	-0.490057183388179	0.552500648015817	0.545123961575415	0.417609146077876	0.656949060742917	0.5055915525868	0.625728637304623	0.474560492386508	0.631700041137333	0.536339061347457	0.481471443920074	0.676832340046367	0.358073947999335	0.390208141166039	0.492728768524799	0.614580972866045	0.498393018432647	0.482704126234589	0.477100285894833	0.399645827166499	0.4721733918048	0.484442779611059	0.454623662348169	0.433993126470029	0.498367514671803	0.424484563957148	0.253540086656204	0.449088212015035	0.469169268560602	0.577783758247745	0.552535318020344	0.430208495645326	0.366260137657324
8-[(2-methylphenyl)methylthio]-9-phenylhydropurin-6-one	-0.390637555555154	-0.432763674678285	-0.438646631997082	-0.399828841495174	-0.374632839900345	-0.372672584646013	-0.402425940680445	-0.385596362260404	-0.377216956392279	-0.373739430088699	-0.395777542843289	-0.368015714934998	-0.396606083921498	-0.394227122141979	-0.386221465067369	-0.422457716760071	0.636976630377744	-0.404636958231913	-0.351453405363773	-0.338437275539	-0.379250622908798	-0.365203418248869	-0.394203719233323	-0.48106766342515	-0.357350729202156	-0.342545581836171	-0.357915650534031	-0.400531204427441	-0.382232179607773	-0.326593014482892	-0.338875820779683	-0.404161085019058	-0.356826675589816	-0.394211866828808	-0.377357268669086	-0.491768594538996	-0.329797407957855	-0.366393336790311	-0.283756413581775	-0.371756859083063	-0.338807234301724	-0.322667037678518	-0.325625838524427	-0.45321864007835	-0.327222772050465	-0.306625999353454	-0.381240200838554	-0.362543684691956	-0.367056670176408
2-Phenethylmalonic Acid	0.546659680101414	0.266675633306382	0.338473107294684	0.397801712575117	0.376213734960944	0.369221260228802	0.45640203083938	0.32708236715418	0.356488391399808	0.326882227076075	0.176058311461045	0.407695813361935	0.229319375222309	0.379284771942206	0.428288691875981	0.170369904243644	-0.306411565735794	0.453241805851677	0.51519635019257	0.539763381255242	0.407257380646893	0.498148466255295	0.232536462599882	0.0964469018337614	0.254055682172387	0.346640382507435	0.497120607956293	0.347234161215507	0.209291170153099	0.603608233567292	0.423177394105056	0.328038624650614	0.573361060612346	0.433511791412445	0.175707304135715	0.514412802535995	0.298248944564742	0.310401929941261	0.388636638904893	0.421289456456724	0.466995804774937	0.668979442083293	0.649927389170722	0.240045286096322	0.449380740187912	0.415544601411434	0.29228283735972	0.394419575925467	0.338093249276871
2-Aminobicyclo[3.1.0]hexane-2,6-dicarboxylic acid	0.350789181707375	0.703480841920188	0.583153663586926	0.496966408799828	0.449951976494075	0.452569754973524	0.25355005549822	0.501681504263484	0.460533821807748	0.474706915386447	0.465179305936076	0.472921307060309	0.502475655402646	0.473883964965165	0.391310964321568	0.464329400873384	-0.351814386100991	0.411745991570155	0.289341164707062	0.358844354638266	0.42009369293602	0.42119686374139	0.699565512512339	0.600614034293942	0.55853391517517	0.398941924734063	0.286855423742002	0.535033186300707	0.293945847202848	0.295440326474037	0.294364582918186	0.710257719206901	0.241168743081319	0.321755749770439	0.633817280431369	0.455759524637215	0.449338087859095	0.451261923521664	0.31109957633572	0.448935270369261	0.268575625414683	0.208801133609163	0.0445848789953275	0.516429570462029	0.335743101647549	0.425599909382099	0.475284630039331	0.540029928199699	0.505658856774712
γ-Glutamylisoleucine	-0.452138482108273	-0.38255019623644	-0.426927093946819	-0.455282513019128	-0.416767474080293	-0.411866928232909	-0.345830037102414	-0.391012389251594	-0.404012931302827	-0.405671716895566	-0.342636955516132	-0.420844856818952	-0.371484432566222	-0.394682874791574	-0.388534520487937	-0.344501018556764	0.392643588028559	-0.464084537767283	-0.365456689334013	-0.378810865028138	-0.431083933592449	-0.449637798013127	-0.350153650710905	-0.416187364396813	-0.39385333761009	-0.383725549086551	-0.397401881178438	-0.413972988407526	-0.357061102056146	-0.330435132357236	-0.390172878697057	-0.288734111390635	-0.40098250049845	-0.39337598966776	-0.253486947063697	-0.220667162327849	-0.404925044848183	-0.324024795445863	-0.397886432897669	-0.294642749889831	-0.365750285934907	-0.406514669855833	-0.327694688254566	-0.398505007179488	-0.320517567305953	-0.441925725610316	-0.379048027177223	-0.223114518420001	-0.272774173948818
-Pentadec-9-enoylcarnitine	0.617513427921872	0.560961873769079	0.625017637827904	0.630520488257292	0.790034382722117	0.788655237110926	0.627788113863677	0.75293618593246	0.793534590334383	0.794697096123035	0.631336408683414	0.828893092653746	0.700174519613859	0.6795573846121	0.758940031942904	0.614662418195254	-0.365223360964496	0.785252830322995	0.737846343431244	0.481570529190071	0.852613588160101	0.557060547408247	0.532731667534951	0.44742548199101	0.717234196898288	0.847268160965179	0.842483124548259	0.783060944243354	0.651335202676728	0.43807324183608	0.861310583045923	0.382272286404013	0.800304719994338	0.723335554248622	0.630307294123165	0.422830004557696	0.39258258655647	0.741720294013947	0.800017049003494	0.634839037013245	0.814791732812067	0.665992121876673	0.474499729684967	0.636078057617503	0.813893340707976	0.741734231197214	0.769359795392703	0.565634363369647	0.543252670312198
Furanone A	-0.30090430039404	-0.457532419232716	-0.39047998792108	-0.313010918863347	-0.395753852629544	-0.394764890501016	-0.437263586675969	-0.40456633476652	-0.386323672692222	-0.393836340954881	-0.477300085271927	-0.359283202867084	-0.383758099615082	-0.413903848145473	-0.366490528619377	-0.48691952976742	0.606867347466505	-0.33585082160953	-0.356840235531091	-0.291425518598042	-0.32808914188536	-0.252599149372386	-0.371590927516995	-0.456378362258764	-0.331736668724752	-0.350851048005198	-0.303523355452935	-0.36867807126091	-0.426866009664612	-0.379491180548339	-0.344717526651189	-0.400170032913511	-0.321860219108178	-0.372018061620904	-0.422592098100334	-0.526332063574312	-0.362045105896276	-0.352831263863164	-0.313108428338949	-0.342307721041966	-0.356733563775066	-0.270394912733866	-0.335360099255192	-0.301868981218345	-0.339485015042562	-0.281164318496588	-0.367324460381219	-0.369468327366684	-0.41062353228849
3-Methylnonanedioylcarnitine	0.457059375820279	0.404076529389971	0.444796642169179	0.439444221099907	0.395714563981808	0.398260581627696	0.244929220967233	0.352595439729457	0.406287989891579	0.366834497053065	0.223700459210789	0.355922832985438	0.30018104508569	0.439770460110667	0.383938051583652	0.260734368324008	-0.333247708377329	0.483992867914035	0.506344266071154	0.452034567673314	0.336963093972542	0.416216416655967	0.318866357693911	0.285850699611022	0.277357899426517	0.293147564297792	0.32023655859841	0.264925597214652	0.126264229987218	0.544899910743277	0.293589000063702	0.532042077295119	0.321776747717171	0.37644699116975	0.216853021963473	0.540797321619221	0.140222930884586	0.334507697532749	0.292488148957352	0.472393921280122	0.369236003999068	0.38829199125866	0.304050704853672	0.284848880216723	0.317847365781884	0.380151517416403	0.219651056092912	0.43782348926743	0.177438576578184
Myricetin	0.406389221635727	0.258701956484369	0.33364357965153	0.326266689778587	0.399105148231993	0.381557747367333	0.511016835397149	0.368051435820174	0.340116193762281	0.338098155420547	0.251731046527363	0.379718354440151	0.305460863370658	0.363185301201426	0.402282727748743	0.257327423886185	-0.33660226671784	0.36336617351312	0.5361304544503	0.429883010682912	0.318863589508698	0.340685980483635	0.280534276669796	0.150268889898386	0.26230245426939	0.333572141349673	0.499479016437931	0.284054913518126	0.242688933269885	0.472149428528841	0.370071371866381	0.207204407256367	0.53323481379716	0.415926909042003	0.216400558873833	0.364040985244892	0.189621248172353	0.255347070483626	0.293722593793827	0.381947752010588	0.371801722415664	0.582064466798958	0.644739199843943	0.264571257640921	0.398928851903991	0.410554631577455	0.293824464761015	0.3429422127765	0.298313691683573
Cadabicilone	0.670307586667393	0.616523727560248	0.5120936759965	0.420728238094847	0.526530702862986	0.51912523774269	0.247675355198815	0.636930976074112	0.548092604411591	0.550799219340874	0.399235297578827	0.577135981209525	0.592918898611465	0.634999374978037	0.52993557527207	0.398130783983497	-0.232372870445115	0.487195336179783	0.446298836617034	0.505944509764786	0.513150301303589	0.529829972728505	0.649052883829375	0.407326586789917	0.613925170824072	0.528253123050137	0.461074287754023	0.551860060418299	0.214941596811642	0.278297151900929	0.453134736879576	0.537934319623447	0.427796840395087	0.304528720385091	0.577398159604413	0.349041682341044	0.397627328046135	0.545547931793847	0.554627763865012	0.462128454395283	0.401088952269826	0.341656955386587	0.219114839326158	0.39292789174119	0.476127433115439	0.561929274568187	0.538844004296721	0.531973400698911	0.411951266452384
Leucylleucine	-0.423049038805481	-0.377561465986263	-0.401436420296111	-0.371809352379876	-0.415056028478501	-0.410688855955485	-0.368142268941053	-0.383801611250202	-0.403920491182378	-0.407680178530181	-0.412715092809012	-0.434360148334404	-0.408172311083736	-0.408610025439715	-0.400521882393761	-0.430874355370151	0.523449134489338	-0.462855332819988	-0.325022472255724	-0.417692114129993	-0.417762030122154	-0.445567980367471	-0.38154514047686	-0.397707021122751	-0.393025988040651	-0.400307247547499	-0.397817156698603	-0.3974173184642	-0.39458512685978	-0.352912104723273	-0.38656707484716	-0.352258059327025	-0.374532612748043	-0.435294216013736	-0.349421312573218	-0.260506820997551	-0.364211330562669	-0.369058551094281	-0.380199538713295	-0.333027052724359	-0.378025634803667	-0.374310589038369	-0.320598485618827	-0.415158519916881	-0.337508515363325	-0.41867798691065	-0.392866378568664	-0.27347993016513	-0.400489649197589
Kynurenic acid	0.360035212898633	0.597137125918243	0.547296304211011	0.5694303631242	0.558844108691312	0.563025914382386	0.4452326053647	0.557824517042326	0.598343883409255	0.582693654864996	0.656837313680745	0.517959710525074	0.619766258922572	0.594836265730912	0.599276735591232	0.651497059570472	-0.444490406238129	0.59300075928382	0.459365652215849	0.505509029883442	0.4645208299333	0.433893794021179	0.652494824608568	0.695453536123876	0.596764929663684	0.529023091707406	0.411255540795227	0.511327773221759	0.534262950689353	0.473077767711883	0.479969808376562	0.624440371199925	0.352105477192633	0.571920673693739	0.683652343743892	0.570517335968693	0.287000649621147	0.607371551954049	0.50784550293467	0.654380283255772	0.454794408533985	0.289294839389649	0.157181869182454	0.719834929536603	0.488096546242932	0.497820898427704	0.541459466146654	0.664292676372317	0.631718613480229
Arabinosylhypoxanthine	-0.468354303691202	-0.315670836431591	-0.397170352552553	-0.43790002739393	-0.40515812776657	-0.402941397951679	-0.395685249232415	-0.374450448533803	-0.38228439216287	-0.384600801831867	-0.289154787878545	-0.411599978942963	-0.349802609578351	-0.364795065954379	-0.395629699669023	-0.290262411521237	0.378433963324167	-0.442725191512683	-0.405376194497607	-0.3306706612352	-0.452392760624808	-0.368285641091456	-0.278318577010876	-0.299301869026352	-0.361173700444281	-0.396422029663953	-0.456175164277549	-0.403161556705404	-0.368457946973915	-0.312335718060613	-0.420647334487331	-0.271134504580583	-0.465334609038566	-0.399360160605023	-0.203336545719921	-0.198648273706912	-0.294625471419682	-0.253936775518763	-0.359183128396411	-0.438115039476031	-0.395036139794908	-0.472666609680306	-0.449577070854996	-0.391083647465118	-0.451251954100884	-0.338159035203416	-0.344965559477704	-0.225713007404008	-0.212934504942128
Sedoheptulose	0.593527139717403	0.336652685696673	0.35203597924784	0.31140951924048	0.364623230090414	0.353235409110695	0.44466303629064	0.332283063456121	0.353721290625346	0.330702494721882	0.189325155476778	0.433615238905754	0.282823221381102	0.300815834576972	0.400186647424247	0.185008966404782	-0.270221374356373	0.398931061010261	0.451874706066624	0.42796343878704	0.441222635676507	0.44767589687068	0.314831521439663	0.1048320721822	0.361997716515225	0.376280557855473	0.552350019386581	0.436996054065537	0.273525534531697	0.472650271447328	0.462126243420448	0.2338180008784	0.601903855198253	0.38921503521624	0.238924399665578	0.297767952857599	0.297237595528645	0.276085998053162	0.373081232466687	0.379888101111722	0.4586556939081	0.67112531582396	0.763338280722609	0.331192551126164	0.509659509967471	0.409210369255322	0.349763752640265	0.28807601573563	0.317140057138929
Glycylleucine	-0.469002937465989	-0.346060599546972	-0.376928454061526	-0.298720763849739	-0.398958281512139	-0.397445137382928	-0.333876844605645	-0.381106067893392	-0.387087945565556	-0.379282775057505	-0.320131021995432	-0.4245648929672	-0.311406619787961	-0.395954459267279	-0.385317033918376	-0.354838825000896	0.494011106848988	-0.460256873266524	-0.363238873251431	-0.421214191516459	-0.391357529313132	-0.481553257674488	-0.351693547436643	-0.274959142886156	-0.362447009927455	-0.372439458655462	-0.356458897365632	-0.440690995625925	-0.319720455120748	-0.388365550986343	-0.376990297115252	-0.5136023572335	-0.366814441948297	-0.465629914716748	-0.281627727098156	-0.316846494348044	-0.319813303633428	-0.295286803647693	-0.343074023876192	-0.527327899519407	-0.425844646520983	-0.387903285054848	-0.363741790987282	-0.333055786537222	-0.436782531322704	-0.371179211331227	-0.389849885983595	-0.286209620242052	-0.398638805930938
Bexarotene	0.608319262513249	0.485446239166263	0.52369899535592	0.492300360221907	0.558967197115258	0.545304113220613	0.471336926181461	0.590409629749169	0.55950359514201	0.551963144997669	0.393647734227928	0.635474152025143	0.533500743353446	0.567037513451285	0.628179274930101	0.406849092652305	-0.194009934963823	0.596630526339605	0.586420874296594	0.773255693140385	0.58220324565459	0.470166259501773	0.521468550730981	0.252553615495899	0.562832987190524	0.572656410410758	0.653512435749457	0.549799630583539	0.313546196696117	0.502981863317994	0.601731072221541	0.468875993609862	0.670520144026479	0.531234437242402	0.530481439555294	0.567877605077125	0.237146421643122	0.597143132301767	0.617393933613313	0.526261820432287	0.579592962704851	0.629620669048038	0.521074171660512	0.479195111923088	0.60293520142077	0.667922155188028	0.534651157999073	0.647800500922405	0.569322841700124
Glutamylserine	-0.413460290039061	-0.320927508555272	-0.416680176762574	-0.429569969600216	-0.431665253414227	-0.428495495888403	-0.369272657579092	-0.399352225177928	-0.405952537581557	-0.41368762189378	-0.392671175626359	-0.432520968724051	-0.35488576742826	-0.378330966426417	-0.399267724902122	-0.399312332897803	0.470770395138715	-0.481933551496493	-0.375128591473668	-0.392411223842713	-0.440726296010014	-0.407396763592661	-0.308944517674964	-0.386149998736766	-0.366844078717732	-0.410023006544526	-0.414631332233038	-0.40615342909574	-0.42244334438421	-0.342098019555487	-0.418854526013843	-0.325733919805499	-0.424782073645078	-0.452707389672989	-0.256229543442924	-0.235221850582034	-0.383005635054518	-0.320773737619931	-0.396137486391148	-0.368985819049321	-0.405409996309896	-0.411723724735101	-0.340779075888127	-0.388490882475497	-0.376002928811707	-0.416664074940545	-0.381842087357904	-0.251579714732934	-0.332446550040276
N6-Acetyl-L-lysine	-0.375632601936926	-0.38944917095056	-0.411727421715206	-0.331429480313555	-0.42142524964367	-0.41927236535945	-0.356836623966215	-0.402662945584855	-0.411439652465552	-0.416417862917331	-0.433796619974888	-0.431024810849106	-0.403102394008689	-0.412757031558922	-0.398509073085398	-0.442860849724212	0.483723606684905	-0.447573900307139	-0.328899488661881	-0.413557551116008	-0.411595555145868	-0.420552930744782	-0.400194282762916	-0.41883830414097	-0.403086782185122	-0.402801446729641	-0.365179979605399	-0.386061415764911	-0.413873802360805	-0.343224774068173	-0.38000029837146	-0.402479910537992	-0.346298381434496	-0.450041471285841	-0.360633571390373	-0.185312256257669	-0.347748514731259	-0.339403972538733	-0.382299446518522	-0.383622812581178	-0.374489803710273	-0.323244484319869	-0.264810996309689	-0.397964211893866	-0.360520452960296	-0.392104690366014	-0.399957266521736	-0.282625836278066	-0.39636612981138
Leucylvaline	-0.399933658443265	-0.392081199249443	-0.391265595283754	-0.389337622401789	-0.385066283841348	-0.380854733652445	-0.367087149300369	-0.368501407497834	-0.377046367961892	-0.382020388515787	-0.420895483144187	-0.404371206000345	-0.403632222362434	-0.389966148729291	-0.376232101686915	-0.440726469395019	0.536130100115413	-0.420119851242447	-0.274705709729219	-0.404200686592751	-0.389108899771803	-0.433944320442077	-0.392546735904856	-0.416500428749978	-0.376421875834599	-0.371320524201211	-0.362962231105056	-0.386069764354334	-0.391576907097891	-0.335730537595311	-0.352016014685361	-0.36700141982935	-0.3316019456148	-0.401672687549411	-0.367483210024322	-0.322187031553124	-0.393033808350554	-0.385551758503501	-0.354192557939196	-0.312224334047191	-0.343106615216948	-0.341401026444218	-0.311807518963487	-0.394515285192545	-0.306412642268647	-0.384284358800012	-0.377081280385434	-0.278288358849535	-0.423792182576401
N-(3,4-Dimethoxyphenethyl)-2-(3,4-dimethoxyphenyl)acetamide	0.400635373972276	0.527628410358865	0.583161878940858	0.591241041581758	0.546462229095713	0.544305713646374	0.503362931188894	0.519757547210627	0.567269660033804	0.546375790691705	0.573719910603331	0.566043313824255	0.567227275392137	0.529718545449136	0.591598767811545	0.564399928827246	-0.255978310779298	0.665174234278926	0.535580718669256	0.502044654392329	0.515123657039515	0.401295613213674	0.587626534857738	0.676895692971883	0.591193096057566	0.548091943754822	0.552517545857798	0.540319189874722	0.567429406683358	0.47341483131017	0.53658482826281	0.525420591931155	0.501141665489197	0.648830356623651	0.522697164097871	0.483308556437649	0.279270283433048	0.556951803875256	0.468891362124867	0.638645636469813	0.513867635289318	0.490210183883407	0.348542873778607	0.788114586117107	0.542589652745957	0.5398197821528	0.565303739314904	0.538055757533451	0.602390701410382
Eicosanedioic acid	0.275017878762645	0.505934636414898	0.421791410204859	0.350082240000888	0.325549634143415	0.328229776786182	0.287777625249237	0.417869768682198	0.318765541353565	0.342571042475233	0.424357582831294	0.299198907018222	0.413413318628197	0.426784916997318	0.30807553664362	0.409164824406216	-0.445575896840817	0.270532731375801	0.240459296093827	0.372114495140188	0.235394674686649	0.297467184304288	0.499812187418793	0.504013550333357	0.354885777884501	0.261133976145911	0.16101634898995	0.359832201332103	0.264219312045668	0.22499135877468	0.193300241350186	0.504894909549483	0.128292490923663	0.255163979126262	0.444981826246648	0.439817222977209	0.343107993957214	0.336954329301942	0.276924055943822	0.307956425433052	0.178156362345852	0.117600753940398	0.0351688524285466	0.347113221901447	0.178094199845961	0.314980288029209	0.305134945270473	0.397820654628496	0.4150661757982
Glycyrrhetinic acid	0.393569101994207	0.277518255024973	0.344957489264337	0.396305740198894	0.414052339278374	0.424088696892894	0.299880062524321	0.351594372055502	0.395603295597938	0.37380090100012	0.29584650531927	0.31370573125688	0.263579921090105	0.475097643391326	0.428621135850444	0.324234283547034	-0.380439637831491	0.519904647785361	0.536245926017888	0.487337997744811	0.278697276030656	0.534968336039332	0.241377365235975	0.34381184075487	0.190564819862456	0.31541504058625	0.246948210983248	0.204733905003822	0.191930847865873	0.59419295113189	0.296930752569535	0.500857836802256	0.242887790999936	0.500134153754586	0.262499948791074	0.675792994136663	0.152361041205291	0.366089802192359	0.325462582567758	0.580358972348837	0.418990091789238	0.372552976912933	0.172414295698174	0.342285991645195	0.305457302941943	0.402131479467374	0.214448683866428	0.497334387969367	0.325853470540397
N-Acetylalanine	0.548786820510645	0.476630133964315	0.49733780288589	0.473029804025719	0.577850571687665	0.574848369458085	0.531741944527969	0.552342619734959	0.574119894894097	0.575871673646075	0.497953455673722	0.614913732910475	0.558262651092356	0.498422822144748	0.588552086964859	0.463117512630646	-0.286823529319287	0.545609376482227	0.530972723657345	0.38971726259192	0.580588997719953	0.46878188248924	0.493679192232449	0.389166390505089	0.579622361809759	0.630704228596625	0.654591665526534	0.594234108735655	0.533974859875717	0.37496468702634	0.644392664629276	0.285489537123049	0.631672954049912	0.524268294151632	0.486027654132947	0.322119332066253	0.362300406375559	0.541309718883847	0.546353902654421	0.45885674706531	0.560687194237949	0.572126194795233	0.595478495770939	0.49054026575939	0.612697671750055	0.603450730247737	0.561609369090541	0.357843863702668	0.519587455037072
Threonylleucine	-0.353367354512687	-0.36228413876784	-0.354996041993241	-0.312139757379288	-0.441421173364114	-0.439638083008853	-0.383248045916086	-0.412349562718889	-0.428643339518939	-0.435148661607946	-0.453469473515527	-0.443959232735816	-0.399653877030326	-0.434697417923923	-0.408665133826334	-0.461284193302627	0.5011011797733	-0.443966205992067	-0.339383917892554	-0.389416526947924	-0.423466320864714	-0.419996556081555	-0.360719850777587	-0.376877857941714	-0.385359226714912	-0.428678304977148	-0.394145177089262	-0.39983372637164	-0.439141976108481	-0.37065598900529	-0.409846696973277	-0.384692451270574	-0.356369126990008	-0.456903567858788	-0.343179602364252	-0.181294511135599	-0.325698386836034	-0.365771607825608	-0.404611088579276	-0.365023812203709	-0.399326615226545	-0.359612504546481	-0.284526141326287	-0.351407483415388	-0.367663859232679	-0.365649901095086	-0.400570185591689	-0.283308642085389	-0.398873662694749
6,7-Dimethoxy-1,2,3,4-tetrahydroisoquinoline-3-carboxylic acid	0.36604141276108	0.563207889369777	0.532768423831485	0.485539183715484	0.542412328828778	0.547952315761578	0.255002184952797	0.517139520887108	0.555980308624961	0.534418272514128	0.428558340698384	0.484453399649183	0.465810818898903	0.569178854499119	0.494311899485717	0.455176423690067	-0.316051187421252	0.548353452971199	0.55982497757366	0.483490384758361	0.453431456401184	0.496369189193638	0.52856843827871	0.471469661965668	0.469823661993146	0.452151043229534	0.32675631571661	0.436373754358657	0.239384894961283	0.513026137925983	0.393796815708514	0.608446830275901	0.289542285721988	0.481631667584744	0.496554257539812	0.568844413829899	0.241322429490762	0.52219962577996	0.442989590170655	0.511380835244674	0.444627811303018	0.292093796146804	0.0503392426095393	0.442663117189745	0.360879115170359	0.542844585998266	0.399778584900762	0.58783030425775	0.356622814716816
Bentazone	0.544102551218225	0.355031002466542	0.427172313113244	0.352930234905613	0.418513030052551	0.402061195239075	0.62847360636443	0.392830647568601	0.407577537449815	0.383610936392627	0.324921140494059	0.547217679393528	0.380005513133142	0.337564986776154	0.500116907254753	0.313093115401144	-0.335740122169792	0.476227693741331	0.480797407672654	0.637760791528735	0.521116601552474	0.254677451315415	0.394193179254728	0.115724961110651	0.447676931465345	0.467439539379492	0.695479423540938	0.53710044552229	0.421432134495419	0.623012135014187	0.575237639440048	0.340704576168831	0.755546053707284	0.501720827641932	0.340941776169376	0.385199018460936	0.203311827126417	0.405921195774405	0.494470139852188	0.388326491616438	0.519021831232345	0.790305444256404	0.866492687273557	0.39793879747598	0.579792101093798	0.489216180619528	0.491110552975095	0.337562489821996	0.565539916366579
Vitexin-2-O-Rhamnoside	0.582553691320414	0.380617856297679	0.439515953751297	0.383746728157496	0.463717432143672	0.448354914223242	0.610720510933318	0.432724591494341	0.455577383463763	0.43175129986737	0.3310103746646	0.579353143551004	0.406203865639439	0.370131189266189	0.521253753127972	0.328129353535238	-0.298880677014039	0.526530290712647	0.510007963986363	0.601218414205116	0.573434675731348	0.287495081893639	0.391382613764582	0.136275442980672	0.480335362440902	0.516706321259791	0.713567135409707	0.574725150980267	0.434000013069317	0.586761397818678	0.613262976608631	0.333602392381824	0.767506026512362	0.504033629811506	0.338920683670544	0.347331537173332	0.230051885445979	0.426670209032691	0.53392967058124	0.410508384929932	0.558832596319871	0.778285996377714	0.83862190882091	0.394753184919592	0.617370927348088	0.519642085477401	0.528855205512822	0.307826060744908	0.507585645069258
6-Oxopurine	-0.364458126139011	-0.358457841063534	-0.396801267944619	-0.429958275454412	-0.288962848011754	-0.284910789401172	-0.272643664430777	-0.28412824343393	-0.283189971910009	-0.274935593975702	-0.255095998020729	-0.298693391071156	-0.337625829109473	-0.29449835905405	-0.279274711175681	-0.273578528804554	0.369325897247971	-0.282912881961967	-0.256193094633647	-0.357527665166595	-0.343875792609554	-0.289007881582354	-0.362047735216223	-0.300906187955941	-0.348587523416605	-0.246918036100953	-0.307321430294453	-0.307746146143087	-0.262402899521362	-0.271844342289243	-0.248419130854663	-0.324669689840882	-0.305279821138515	-0.271915953688457	-0.248928884253687	-0.228536201995612	-0.298108687995694	-0.20943449899284	-0.229246356876355	-0.317553882030245	-0.224710630637978	-0.308292244234314	-0.340115109940052	-0.350349228464525	-0.274036712614632	-0.220397058540278	-0.25204620229099	-0.282196120042515	-0.203267359348117
2-Methylpyrrolidine	-0.404781600870505	-0.412695162292663	-0.446481111399527	-0.500917478535301	-0.369809773073464	-0.369503681657036	-0.376359216359267	-0.380628668180181	-0.35294082449184	-0.354059789052212	-0.340550742102382	-0.37278561548724	-0.348451171909941	-0.318027970579528	-0.357785071498361	-0.291473056963545	0.349704251770235	-0.362303708150621	-0.378274866130158	-0.395195375054946	-0.323171181810732	-0.298429109727738	-0.362680917649016	-0.424930609632339	-0.328063043604616	-0.352634119513345	-0.338853718430464	-0.357587210336034	-0.341289160587313	-0.332559155895183	-0.337283740119084	-0.348776360356196	-0.322650903283259	-0.400031547639828	-0.346168332097737	-0.422701156691057	-0.317035738940511	-0.329304806974797	-0.323168705704247	-0.398429572132658	-0.328420336128422	-0.363686533824088	-0.352433962194028	-0.366080339204627	-0.362028890485233	-0.417361072373464	-0.291797993093112	-0.407350773666261	-0.404627619439198
Oct-5-enedioylcarnitine	0.525859730352765	0.386053324085593	0.493186652402136	0.44450930817555	0.377910103038966	0.37284716556672	0.344001311885859	0.349133994550356	0.391746490705583	0.35682557777486	0.201419058806077	0.420345381451248	0.327644655714503	0.347073878407337	0.384063373795757	0.223941087701506	-0.378313002086569	0.445040034599213	0.507641435345435	0.453812893456503	0.422085866816969	0.380151973440115	0.33086719017361	0.199585763534472	0.359543900734259	0.341040119642912	0.439226938686521	0.393953230489351	0.214897807694243	0.470450835397145	0.376478563470396	0.421068884000277	0.502890171378649	0.354727365251356	0.214475176462366	0.439411895495572	0.270856175515442	0.314767653275009	0.329098818851814	0.396763560517398	0.40127748561189	0.492832019952753	0.505142368137242	0.279495429242198	0.414653333447097	0.432662519535509	0.32297335151299	0.321329167355348	0.235651101022313
o-Dodecylbenzenesulfonic acid	0.502023638767337	0.560043996253634	0.561251175577948	0.478893529640162	0.646611046863428	0.63593879674132	0.605551604167817	0.633379992163184	0.658618230591201	0.663138208416257	0.581650255254607	0.721569244961522	0.614040771444438	0.576934236834256	0.67148625712523	0.571672897597896	-0.347593468700256	0.666387595694397	0.612876048219208	0.532927390743324	0.6632340320571	0.425963857383905	0.594277719699026	0.41812880120594	0.66225419231368	0.69745809960202	0.718694415388241	0.718491920882633	0.594635376189598	0.459713868863621	0.70676206409018	0.488080674848631	0.700950531520389	0.651514225032029	0.611063433470418	0.457156892211793	0.319822395302363	0.641512555428483	0.655724195820751	0.616240937422991	0.680880131944068	0.665979093352011	0.542929549234653	0.556197595915673	0.739193123452227	0.637404263872017	0.667996046267396	0.54471867285741	0.664674164558827
1-Naphthalenepentanoic acid, 4-(acetyloxy)-3,4,4a,5,6,7,8,8a-octahydro-β,2,5,5,8a-pentamethyl-3-oxo-, (4S,8aS)-	0.472363424998579	0.590236398835155	0.659011251247287	0.624346312091022	0.810305830245679	0.809718561362441	0.602362807626314	0.716593776494952	0.79307361625958	0.799556719176933	0.694877175038113	0.819159025984065	0.668927571441037	0.623541580046746	0.757338605471956	0.671608748488747	-0.314062947645134	0.750733658069531	0.72435724261443	0.443873009341943	0.807864241434475	0.54486716844153	0.581386343808191	0.475779924330474	0.721862951592256	0.840978868197436	0.828483164398258	0.73354998640603	0.729431047890728	0.503724522708969	0.855338368160117	0.42455956815292	0.81587671238461	0.772442405893248	0.67750995799764	0.400479306019114	0.384124349570106	0.657160254899662	0.661856600350766	0.651284303425473	0.736849358660091	0.683105211431898	0.548158492120335	0.685433559798119	0.846630394087825	0.700211688501798	0.705324160143474	0.597822980300413	0.640004147546717
(E)-5-hydroxy-3-isobutyl-6-(3-methylbenzylidene)-1,6-dihydropyrazin-2(3H)-one	0.336740399053969	0.54841365357698	0.53609197086469	0.618868539427002	0.571550019721138	0.570646162926816	0.450674379064525	0.533891735204151	0.609711510485442	0.585616092856131	0.651720534289508	0.531906008917042	0.638805373675295	0.607812947315637	0.63980503654904	0.655041763660035	-0.377250261142878	0.620627039294658	0.532417898238658	0.481711367947903	0.482970499271774	0.353466023341561	0.646044712341282	0.672092626787863	0.614076570476378	0.535977521729862	0.516524736060136	0.531227914905404	0.57101493677612	0.525473001394572	0.526283126638359	0.472285743512562	0.451836577217472	0.601577442437998	0.607646634033819	0.521389944099217	0.179337343856489	0.633605037466699	0.524541490924691	0.585077709175605	0.476266126076947	0.417651970737273	0.258241464855068	0.802755325747192	0.469203006238092	0.556063845174797	0.522775393946041	0.665704654766798	0.561809848552162
5-[5-(acetyloxymethyl)-1,2,4a-trimethyl-7-oxo-3,4,8,8a-tetrahydro-2H-naphthalen-1-yl]-3-methylpentanoic acid	0.291118289249339	0.514076528684555	0.425817228893476	0.356113331305055	0.472647856799046	0.47217355956113	0.337909338815537	0.482800918661681	0.491021888459895	0.491357473224784	0.60822913824441	0.439042557926289	0.545112921767288	0.501375191846551	0.441497812954212	0.650472583626919	-0.5550619914271	0.406815108306845	0.368101998784257	0.394557293814023	0.354291528031303	0.350113040598078	0.531241871851241	0.521203511084904	0.455664836646198	0.438047954008063	0.295189223330712	0.389785257682413	0.482221939708167	0.356992329629524	0.365332831178192	0.528789401157235	0.246791552306911	0.452306786402491	0.582951625333949	0.544592102596909	0.303147081298308	0.533318072009755	0.364647365788632	0.417631817830158	0.337399979680332	0.169192743734515	0.109566738882365	0.48487965079214	0.35644402259748	0.377158461693373	0.424368717229829	0.512159653051783	0.539054710134624
Leucylasparagine	-0.414897801882827	-0.400971540756459	-0.431724005784686	-0.39167615190582	-0.387559970230051	-0.383648005565505	-0.400331880985537	-0.375856828132442	-0.376826556262742	-0.376132736419754	-0.354611822200777	-0.415781634176816	-0.338996642773546	-0.353005986809649	-0.382168852096618	-0.344232366311745	0.507951401120594	-0.43591986001469	-0.312533608251042	-0.390256679992502	-0.390752539039774	-0.437017876511642	-0.376538002854485	-0.390020676727667	-0.379526544181962	-0.372037054435305	-0.367735941889155	-0.431705470880029	-0.372528566368607	-0.330519323122592	-0.368019274183581	-0.441441588146687	-0.378912049172697	-0.436108972752018	-0.32192446118753	-0.289617130885302	-0.407418703201728	-0.283334204217426	-0.342194894895732	-0.452491844446645	-0.36994425035082	-0.387587505214289	-0.343816652209361	-0.41093150570928	-0.411822695812001	-0.417717840916678	-0.388695777039794	-0.28942427742073	-0.421542336741163
Monoketocholic acid	0.440502606930968	0.578250896499264	0.569881356581741	0.498870317935123	0.704462087186566	0.705950693681511	0.516197850135185	0.638744815850184	0.709261078466472	0.717539015878456	0.587491547963211	0.769743501445168	0.611190254679375	0.61984917441617	0.665820897943187	0.598219867886122	-0.436189722461816	0.71102481799061	0.654122143419456	0.459000462924349	0.710530842758472	0.569970087205941	0.549178466662145	0.397092688857723	0.636904639929131	0.730849000127249	0.686593603162877	0.690035424138118	0.566599283419026	0.506887578387779	0.689731930504005	0.607636716089561	0.639812893222879	0.669631793114195	0.61994110642619	0.520957611327434	0.341208210253814	0.658882275440022	0.625534321518911	0.687026933952673	0.684145447128636	0.606283159403383	0.370020533566103	0.56723843059144	0.740399332333106	0.637478522826237	0.606934205802956	0.585875621672675	0.606520993854
2-Hydroxyphenazine	0.611001503269876	0.533560768297592	0.53477027574805	0.503126061501505	0.700383103205298	0.69256291159346	0.59631324708435	0.73250465258101	0.694760955186438	0.718351435127748	0.628030847652516	0.796156653766505	0.674638653530628	0.637505223259907	0.729160594829241	0.61250675818261	-0.313135020059177	0.695461836796645	0.60218066015017	0.630193812802869	0.714074889232246	0.50183441674689	0.592013009212766	0.375581971346257	0.684665464468056	0.799631191098278	0.775390607368589	0.766822442433114	0.596045647394529	0.417004138045858	0.776437923779311	0.475554257480006	0.751072649670976	0.651217003818137	0.70851111771816	0.492620615138015	0.349574947755859	0.752579806327704	0.745278104606564	0.609268400252478	0.723439133771183	0.655327559702667	0.498466215008866	0.559854132681663	0.784713274886676	0.727353324164452	0.763473588007507	0.584623503036401	0.790217270986406
β-Amyrin	-0.402324634846881	-0.383732541045685	-0.428975228525874	-0.376761576977544	-0.380517674367652	-0.378264020973318	-0.326780831758359	-0.408523986710885	-0.387678225304199	-0.380020753651478	-0.39574863164613	-0.381933848853165	-0.403149099181964	-0.391185984792169	-0.396944234483747	-0.416900731843163	0.5507395944099	-0.389642048930511	-0.355968607939903	-0.446876302184061	-0.351243793900761	-0.327465531017041	-0.396938935850998	-0.402053520629566	-0.376785626006372	-0.344591611652146	-0.366475808354798	-0.373066133589096	-0.359984183061313	-0.343397077282335	-0.353861700748174	-0.404134715493044	-0.356494815116748	-0.394071466968326	-0.375271608773498	-0.51584817087449	-0.27768041168826	-0.394365436113712	-0.326417957398918	-0.400969347751529	-0.35184686205557	-0.351387011094448	-0.344566739478389	-0.459057520675378	-0.353424173874025	-0.37739367318923	-0.342261969736025	-0.443592628036433	-0.396236500813221
9-HOTrE	0.518209922039737	0.364876317732857	0.392035325999609	0.484005318948394	0.361284285333072	0.348379055515936	0.383158832469591	0.365160926309612	0.366848783099148	0.343018619855256	0.295374157939618	0.409194259377416	0.35353589622651	0.374779964591162	0.431129914109799	0.288272856214504	-0.240475103291609	0.424018796625605	0.357949997426073	0.708807433868578	0.359442608370733	0.32889967320452	0.406799355810412	0.343984813710428	0.409725085463683	0.354088403153179	0.442490758398927	0.389127142348783	0.298519044896892	0.342151599488928	0.392040309311251	0.351477182728127	0.473644823687553	0.372200730333204	0.343579614125507	0.429151103234014	0.254482567736747	0.391955527511249	0.46437165517261	0.378438393195815	0.353223119453576	0.431861835245045	0.476080094607941	0.419917676598191	0.40372686412144	0.424433378215511	0.363081461490728	0.446540012139126	0.458634795994391
Pyridoxine	0.546463938317111	0.295140926268667	0.372100948178287	0.312168231405198	0.320077455387283	0.301517988417903	0.52697795762744	0.349035975378419	0.304011867125165	0.278711320698885	0.242092244336949	0.39513324438948	0.30992174976391	0.318438190133329	0.428980619538582	0.232516996072517	-0.351490695206393	0.406878156448105	0.442922851693101	0.510793940765006	0.349803442793222	0.243546422232046	0.362781341220163	0.118031667475023	0.345300845106429	0.317050538264781	0.539880432307832	0.43554116265463	0.242728589320957	0.60389800873597	0.416532666107261	0.338099814873177	0.607534878877079	0.39886219694624	0.276268407810302	0.420678878604563	0.106892582358165	0.329644031566013	0.414613543890372	0.379241846936088	0.394631280186388	0.681317793543155	0.713375327469963	0.374135418486202	0.433867961058046	0.458167249889824	0.397451211751734	0.32770659433436	0.459934078081806
Verbascose	0.583637827327019	0.524811501347033	0.514087131194726	0.526619875973538	0.670193997412271	0.664416540954438	0.482075749054036	0.710962311271416	0.664469769496812	0.689735587898116	0.555013300384362	0.714255851493915	0.624092969548536	0.656818838243122	0.646227912929354	0.535434914648586	-0.297204261214278	0.649102953987968	0.585690852971565	0.460955489414774	0.680722322229875	0.525960766177508	0.513689756205898	0.432647191221305	0.630192491635624	0.731739015122701	0.662300043283855	0.662928059222248	0.509057698325363	0.2837283984424	0.690130233332416	0.4096330398479	0.647776565376844	0.526207787399293	0.582010992284838	0.347895486724742	0.405046407423512	0.611940044543625	0.668506012475496	0.491932161347845	0.604985967586236	0.44399542891735	0.373787116372333	0.469988835846232	0.666121372002552	0.651363650317777	0.644607838464519	0.48950236171271	0.517082135976569
3,9-Dihydroxypterocarpan	0.350658580154641	0.307899358679304	0.293712864053648	0.358376034166302	0.379636050315383	0.392186961643014	0.163025608511207	0.348675663620713	0.371438618604309	0.360530168815196	0.296121514939837	0.253757146353598	0.266102776100216	0.491477632452891	0.393035340792473	0.319467981942024	-0.378491331372671	0.463343257120713	0.484149159965222	0.382284693942298	0.199115078419125	0.488734879616059	0.25030111254939	0.367870413440235	0.156533729068335	0.263688238955827	0.162207888568618	0.142226424059785	0.11101237104364	0.525583235889916	0.211103826825048	0.508931572995757	0.145695362922863	0.353399298067987	0.266757190928775	0.61429540325529	0.0810304748001953	0.353735120190891	0.273952243519157	0.535835556094354	0.316440996896881	0.254819639953562	0.0499859490086841	0.295210542178124	0.239160144965885	0.309851121779432	0.123034638727079	0.477383848925043	0.222610828128218
(Z)-2-((Z)-1-(hydroxyimino)ethyl)-6,6-dimethylbicyclo[3.1.0]hexan-3-one oxime	0.347712333750255	0.369506359847007	0.381325025263056	0.369425571605357	0.33941886865643	0.346348222205784	0.240253486478134	0.331829357706377	0.329938165344253	0.306773478528628	0.26240882259031	0.262798364385653	0.289745802726837	0.444213345599193	0.359843543656325	0.290813984845872	-0.324476416651317	0.395860455061132	0.437684370947538	0.380889755204313	0.196651697243197	0.44940981627173	0.373112584220936	0.403208388490245	0.249730297921752	0.2261352675078	0.165810183613266	0.184253591241968	0.0899068725343319	0.485506527283288	0.168976614796058	0.521467460916858	0.138837590423074	0.372347359235966	0.292137793672322	0.605769205906035	0.194103453919332	0.312913111660039	0.225177242626244	0.498752972653395	0.245607635195385	0.283648826143161	0.0979833100505901	0.34511574706851	0.181536178185769	0.372587957611705	0.191258620512977	0.474349404233495	0.306577505016687
[truncated: 251 more columns]
